# Supplementary material for: Rare diseases in China: analysis of 2014–2015 hospitalization summary reports for 281 rare diseases from 96 tertiary hospitals
Source: Orphanet J Rare Dis. 2019 Jul 1;14:160. doi: 10.1186/s13023-019-1137-y (PMC6604331; doi:10.1186/s13023-019-1137-y)
Supplement: Supplementary file 2 — The number of hospitalizations with each rare disease in TRDL 2017. (XLSX 275 kb) [file 13023_2019_1137_MOESM2_ESM.xlsx]

## Sheet: 原始结果
2017版罕见病名称及分布（281个名称）
疾病编码	疾病名称	年份	人次	最终结果核实	男性	Age_mean	Age_sd	0-4	5-14	15-24	25-34	35-44	45-54	55-64	65-74	75-84	85+	医院个数	重返人次	人数=总人次-重返人次	北京	天津	河北	山西	内蒙古	辽宁	吉林	黑龙江	上海	江苏	浙江	安徽	福建	江西	山东	河南	湖北	湖南	广东	广西	海南	重庆	四川	贵州	云南	西藏	陕西	甘肃	青海
1	进行性多灶性白质脑病	2014	10		5	37.9	21.3565	0	0	4	2	0	2	0	1	1	0	6	0	10	0	0	0	0	0	0	1	3	0	0	0	0	0	0	0	0	1	0	1	0	0	2	0	0	2	0	0	0	0
2	朊蛋白病	2014	32		13	60.4062	9.71151	0	0	0	0	1	6	16	8	1	0	17	2	30	2	0	0	0	0	0	0	2	1	3	0	0	2	0	8	3	1	5	2	0	0	0	0	0	1	0	1	0	1
3	肺毛细血管瘤样增生症	2014	10		6	48.7	10.6045	0	0	0	1	3	2	4	0	0	0	8	0	10	3	2	0	0	0	1	0	0	1	0	1	0	0	0	0	0	0	1	1	0	0	0	0	0	0	0	0	0	0
4	POEMS综合征	2014	595		340	51.2017	12.383	0	1	5	48	142	153	159	76	11	0	54	192	403	198	4	1	0	0	8	6	7	32	12	37	0	15	0	20	72	24	24	25	8	0	3	94	0	0	0	2	0	0
5	Castleman病	2014	67		53	50.9701	17.3668	0	1	4	3	17	13	16	7	6	0	15	16	51	26	3	1	0	0	3	0	0	0	9	2	0	6	0	0	0	0	8	0	0	0	0	0	0	9	0	0	0	0
6	木村病	2014	97		86	38.4124	17.4378	0	15	11	7	24	21	17	2	0	0	24	27	70	2	0	0	0	0	2	0	0	3	2	1	0	6	0	2	12	14	0	41	1	0	0	1	0	0	0	1	0	0
7	甲状旁腺癌	2014	93		50	49.4194	13.2569	0	0	3	12	21	21	25	9	2	0	38	6	87	25	2	0	0	0	2	4	5	17	2	1	0	4	0	6	3	5	3	2	2	0	1	2	0	1	0	4	2	0
8	多发性内分泌腺瘤病	2014	120		45	43.0833	14.7367	0	5	4	29	22	35	16	7	2	0	29	13	107	54	0	0	0	0	6	0	1	27	2	10	0	3	0	0	1	0	2	1	0	0	3	7	0	0	0	0	3	0
9	雷特综合征	2014	45		28	10.4444	11.9935	13	25	4	0	0	3	0	0	0	0	14	2	43	6	0	0	0	0	0	1	0	1	2	0	0	1	0	0	2	0	1	26	0	0	0	3	0	0	0	0	0	0
10	先天性视网膜劈裂症	2014	1		1	12	NA	0	1	0	0	0	0	0	0	0	0	1	0	1	0	0	0	0	0	0	0	0	0	0	0	0	1	0	0	0	0	0	0	0	0	0	0	0	0	0	0	0	0
11	视网膜血管病变伴有大脑白质脑病	2014	0	未查询到此病	0	0	0	0	0	0	0	0	0	0	0	0	0	0	0	0	0	0	0	0	0	0	0	0	0	0	0	0	0	0	0	0	0	0	0	0	0	0	0	0	0	0	0	0	0
12	视网膜色素变性	2014	886		451	50.3081	15.7242	10	15	20	89	154	211	240	109	38	0	74	118	768	178	8	4	0	0	23	56	15	60	16	45	0	38	0	21	47	39	59	118	10	0	16	42	0	9	0	17	4	13
13	Leber 遗传性视神经病	2014	5		4	16	6.44205	0	3	1	1	0	0	0	0	0	0	3	0	5	0	0	0	0	0	0	2	0	0	0	0	0	0	0	0	0	3	0	0	0	0	0	0	0	0	0	0	0	0
14	慢性进行性眼外肌麻痹	2014	0	47个疾病名称无完全匹配，无“慢性”	0	0	0	0	0	0	0	0	0	0	0	0	0	0	0	0	0	0	0	0	0	0	0	0	0	0	0	0	0	0	0	0	0	0	0	0	0	0	0	0	0	0	0	0	0
15	KSS 综合征	2014	7		4	28.4286	24.2133	0	4	0	0	0	1	2	0	0	0	6	0	7	3	0	0	0	0	0	0	0	0	0	0	0	0	0	0	0	0	0	2	0	0	0	2	0	0	0	0	0	0
16	常染色体显性遗传性美尼尔病	2014	0	1465疾病名称无“常染色体显性遗传”表述，仅能查到梅（美）尼尔	0	0	0	0	0	0	0	0	0	0	0	0	0	0	0	0	0	0	0	0	0	0	0	0	0	0	0	0	0	0	0	0	0	0	0	0	0	0	0	0	0	0	0	0	0
17	遗传性肺动脉高压	2014	17		5	35.2941	11.5908	0	1	0	7	6	2	1	0	0	0	2	5	12	16	0	0	0	0	0	0	0	0	0	0	0	0	0	0	0	0	0	0	0	0	0	1	0	0	0	0	0	0
18	特发性肺动脉高压	2014	4661		1837	46.6958	24.7089	495	110	275	618	505	609	746	655	528	120	63	281	4380	786	0	4	0	0	95	7	644	330	294	36	0	20	0	438	53	358	46	91	82	0	382	192	0	6	0	203	4	434
19	常染色体显性遗传性脑动脉病伴皮层下梗死和白质脑病	2014	34		16	49.0588	9.49941	0	0	1	1	7	16	8	1	0	0	9	0	34	22	0	0	0	0	0	0	0	0	0	6	0	0	0	0	0	2	1	0	0	0	0	3	0	0	0	0	0	0
20	常染色体隐性遗传性脑动脉病伴皮层下梗死和白质脑病	2014	0	未查询到此病	0	0	0	0	0	0	0	0	0	0	0	0	0	0	0	0	0	0	0	0	0	0	0	0	0	0	0	0	0	0	0	0	0	0	0	0	0	0	0	0	0	0	0	0	0
21	烟雾病	2014	3441		1642	41.0131	15.2767	64	237	174	465	916	988	478	102	17	0	73	355	3086	956	29	11	0	0	63	189	146	428	163	126	0	96	0	162	516	179	67	90	23	0	25	68	0	30	0	43	0	2
22	红斑肢痛症	2014	47		27	49.2553	21.1911	0	7	1	3	5	7	13	6	5	0	23	3	44	5	0	0	0	0	2	0	0	0	0	2	0	2	0	5	9	6	3	0	0	0	2	2	0	1	0	2	0	0
23	儿童原发性小肠淋巴管扩张症	2014	2	疾病名称无“儿童”仅用限制患者年龄确定	0	14	0	0	2	0	0	0	0	0	0	0	0	1	1	1	0	0	0	0	0	0	0	0	0	0	0	0	2	0	0	0	0	0	0	0	0	0	0	0	0	0	0	0	0
24	大动脉转位	2014	1082		707	6.57579	13.1183	788	125	59	44	28	17	13	6	2	0	46	125	957	401	7	2	0	0	6	9	24	241	4	4	0	9	0	36	40	42	31	167	11	0	0	26	0	0	0	3	1	1
25	主动脉缩窄	2014	1269		865	9.1576	14.7693	756	255	81	65	47	35	25	1	4	0	53	242	1027	753	2	0	0	0	3	16	12	165	19	2	0	10	0	23	18	25	25	122	8	0	2	51	0	2	0	2	3	0
26	左心发育不全综合征	2014	65		31	1.90769	3.64744	55	9	1	0	0	0	0	0	0	0	16	5	60	29	2	0	0	0	0	2	0	6	3	1	0	0	0	2	2	2	6	8	0	0	0	2	0	0	0	0	0	0
27	DiGeorge综合征	2014	13		7	2.69231	4.4793	10	2	1	0	0	0	0	0	0	0	9	2	11	2	0	0	0	0	0	0	0	2	0	0	0	0	0	2	1	0	2	4	0	0	0	0	0	0	0	0	0	0
28	致心律失常性右心室心肌病	2014	170		123	41.6882	17.3459	4	9	18	21	36	44	23	12	3	0	18	10	160	114	0	1	0	0	3	6	6	0	18	10	0	0	0	0	0	6	2	0	0	0	0	0	0	3	0	0	1	0
29	特发性心肌病	2014	10		3	38.2	24.1468	2	0	0	2	3	0	1	1	1	0	10	0	10	4	0	0	0	0	1	0	1	0	0	0	0	0	0	3	0	0	0	0	0	0	0	1	0	0	0	0	0	0
30	地中海贫血	2014	6782		1761	28.5161	17.0293	771	593	736	2988	805	311	293	173	87	25	66	1265	5517	192	22	0	0	0	6	7	1	68	4	19	0	165	0	0	8	179	153	3565	1455	0	199	656	0	69	0	4	2	2
31	溶血尿毒综合征	2014	265		153	18.1962	17.331	46	115	9	40	16	31	3	4	1	0	38	106	159	109	14	0	0	0	8	11	3	10	1	0	0	0	0	37	30	9	4	15	1	0	1	4	0	0	0	0	0	0
32	陈发性睡眠性血红蛋白尿症	2014	629		352	40.9507	15.9224	1	9	106	122	135	130	74	33	19	0	60	153	476	44	137	5	0	0	33	78	51	17	8	8	0	1	0	18	34	44	28	47	12	0	3	15	0	1	0	2	5	2
33	范可尼贫血	2014	164		94	23.5061	20.8525	26	63	9	14	18	13	13	7	1	0	29	19	145	31	69	0	0	0	1	0	0	4	0	4	0	1	0	3	9	3	10	13	3	0	4	6	0	0	0	2	0	0
34	先天性纯红细胞再生障碍性贫血	2014	546		254	49.326	23.8235	49	17	22	42	70	86	104	83	52	21	49	191	355	53	182	0	0	0	13	25	7	33	25	2	0	9	0	26	4	66	17	17	4	0	13	3	0	3	0	9	1	10
35	先天性中性粒细胞减少伴胰腺机能不全综合征	2014	0	未查询到此病	0	0	0	0	0	0	0	0	0	0	0	0	0	0	0	0	0	0	0	0	0	0	0	0	0	0	0	0	0	0	0	0	0	0	0	0	0	0	0	0	0	0	0	0	0
36	先天性中性粒细胞缺乏	2014	1		1	5	NA	0	1	0	0	0	0	0	0	0	0	1	0	1	0	0	0	0	0	0	0	0	0	0	0	0	0	0	0	0	0	1	0	0	0	0	0	0	0	0	0	0	0
37	原发性慢性肉芽肿病	2014	52		43	4.21154	3.98692	40	12	0	0	0	0	0	0	0	0	6	22	30	43	0	0	0	0	2	0	0	1	0	0	0	0	0	0	0	5	0	0	0	0	0	0	0	1	0	0	0	0
38	朗格汉斯组织细胞增生症	2014	3302		2114	7.05421	10.4937	1927	1040	124	76	50	54	26	4	1	0	59	2164	1138	2080	6	0	0	0	15	1	3	163	26	9	0	13	0	55	142	135	94	314	88	0	18	65	0	2	0	4	0	0
39	家族性噬血细胞综合征	2014	25		13	30.76	26.8999	7	2	3	0	5	2	4	0	2	0	4	1	24	25	0	0	0	0	0	0	0	0	0	0	0	0	0	0	0	0	0	0	0	0	0	0	0	0	0	0	0	0
40	X-连锁无丙种球蛋白血症	2014	34		33	10.2353	16.4815	7	24	1	0	0	0	0	1	1	0	10	12	22	2	0	0	0	0	0	0	0	6	0	0	0	0	0	1	1	0	3	1	17	0	0	2	0	0	0	0	0	0
41	血管性假性血友病	2014	14		3	26.7857	20.4758	0	7	2	0	1	3	0	1	0	0	10	1	13	3	0	0	0	0	1	0	0	0	0	2	0	0	0	0	2	2	0	0	0	0	0	1	0	0	0	0	0	0
42	生物素酶缺乏症	2014	3		3	25	36.428	1	1	0	0	0	0	0	1	0	0	3	0	3	0	0	0	0	0	0	0	0	1	0	0	0	0	0	0	0	0	1	1	0	0	0	0	0	0	0	0	0	0
43	(重症) 联合免疫缺陷	2014	7		6	8.42857	22.2999	6	0	0	0	0	0	1	0	0	0	4	0	7	0	0	0	0	0	0	0	0	5	0	0	0	0	0	0	0	0	0	1	0	0	0	1	0	0	0	0	0	0
44	湿疹血小板减少伴免疫缺陷综合征	2014	3		3	0.666667	0.57735	3	0	0	0	0	0	0	0	0	0	2	1	2	0	0	0	0	0	0	1	0	0	0	0	0	0	0	0	0	0	2	0	0	0	0	0	0	0	0	0	0	0
45	X-连锁淋巴增生症	2014	7		1	34.7143	28.6282	1	2	0	0	1	0	3	0	0	0	6	0	7	2	0	0	0	0	1	1	1	0	0	0	0	0	0	0	0	0	0	0	0	0	1	0	0	1	0	0	0	0
46	高IgE综合征	2014	64		52	22.4375	22.9913	15	22	4	4	6	1	8	3	1	0	22	9	55	24	0	0	0	0	1	0	0	3	0	0	0	16	0	1	2	2	3	5	0	0	3	3	0	1	0	0	0	0
47	遗传性血管性水肿	2014	6		5	36	20.3765	0	1	1	1	0	2	1	0	0	0	4	0	6	2	0	0	0	0	0	0	0	0	0	0	0	0	0	0	0	2	0	0	0	0	0	1	0	0	0	1	0	0
48	血栓性血小板减少性紫癜	2014	403		162	35.0769	20.155	4	85	47	63	61	66	43	26	8	0	55	72	331	37	42	0	0	0	16	12	31	15	6	17	0	11	0	92	19	12	30	8	4	0	13	16	0	10	0	5	0	2
49	先天性无巨核细胞性血小板减少症	2014	37		16	36.5405	26.3086	3	9	0	8	0	6	4	5	1	1	10	5	32	8	0	0	0	0	0	3	0	3	0	1	0	0	0	3	0	1	0	0	0	0	0	0	0	0	0	0	0	2
50	葡萄糖-6-磷酸脱氢酶缺乏症	2014	390		258	15.6205	24.6344	259	12	9	22	17	19	25	21	5	1	5	15	375	0	4	0	0	0	0	0	0	0	0	0	0	3	0	0	0	0	4	1	378	0	0	0	0	0	0	0	0	0
51	GATA1相关性全血细胞减少	2014	0	未查询到此病	0	0	0	0	0	0	0	0	0	0	0	0	0	0	0	0	0	0	0	0	0	0	0	0	0	0	0	0	0	0	0	0	0	0	0	0	0	0	0	0	0	0	0	0	0
52	血小板无力症	2014	6		2	12.1667	7.05455	1	4	1	0	0	0	0	0	0	0	3	0	6	1	4	0	0	0	0	1	0	0	0	0	0	0	0	0	0	0	0	0	0	0	0	0	0	0	0	0	0	0
53	遗传性纤维蛋白原异常血症	2014	125		73	24.384	21.1861	22	34	19	10	12	15	9	2	2	0	25	19	106	61	30	0	0	0	1	0	2	8	0	2	0	0	0	1	3	1	3	8	1	0	3	0	0	0	0	0	0	0
54	铁粒幼红细胞性贫血	2014	52		33	57.6731	24.1732	4	0	2	2	6	5	8	10	14	1	26	5	47	5	7	0	0	0	2	6	2	0	0	0	0	2	0	1	4	1	2	3	2	0	1	7	0	0	0	0	0	0
55	先天性红细胞生成不良性贫血	2014	12		8	32.5833	22.1707	2	2	0	0	5	2	0	1	0	0	5	0	12	2	6	0	0	0	0	0	0	0	0	0	0	0	0	0	2	1	0	0	0	0	0	0	0	0	0	0	0	0
56	Erdheim-Chester病	2014	9		4	58.6667	10.1858	0	0	0	0	1	3	3	2	0	0	7	1	8	2	0	0	0	0	2	0	0	0	0	0	0	0	0	0	0	0	0	2	0	0	1	0	0	0	0	0	1	0
57	桥本脑病	2014	121		31	50.3802	15.4004	0	1	9	13	14	23	44	12	5	0	25	9	112	1	1	0	0	0	12	0	22	5	2	0	0	5	0	32	14	1	10	7	4	0	0	2	0	0	0	1	0	1
58	先天性高胰岛素性低血糖血症	2014	2		2	0	0	2	0	0	0	0	0	0	0	0	0	1	0	2	0	0	0	0	0	0	0	0	0	0	0	0	0	0	0	0	0	2	0	0	0	0	0	0	0	0	0	0	0
59	肢端肥大症	2014	870		417	45.8448	13.9353	1	5	39	158	195	222	188	35	27	0	66	179	691	311	16	6	0	0	26	9	17	118	12	26	0	73	0	29	11	33	21	54	7	0	7	29	0	7	0	16	9	1
60	卡尔曼综合征	2014	78		72	20.2692	8.83863	0	14	49	11	3	0	0	0	1	0	25	8	70	22	2	1	0	0	1	0	1	3	12	1	0	1	0	4	10	8	0	6	2	0	0	1	0	1	0	0	1	0
61	先天性肾上腺发育不良	2014	5		2	21.8	29.7187	2	1	1	0	0	0	0	1	0	0	4	0	5	3	0	0	0	0	1	0	0	0	0	0	0	0	0	0	0	0	0	0	0	0	0	0	0	1	0	0	0	0
62	先天性肾上腺皮质增生症	2014	475		223	8.19368	10.1266	235	144	55	28	11	1	0	1	0	0	36	69	406	10	5	0	0	0	4	0	4	56	5	7	0	1	0	57	21	3	38	187	15	0	2	0	0	2	0	5	0	2
63	巴特综合征	2014	184		102	25.0489	18.271	33	26	36	35	22	18	13	1	0	0	43	17	167	48	3	0	0	0	8	1	3	6	1	4	0	3	0	12	21	3	18	21	11	0	0	11	0	2	0	2	1	0
64	Gitelman 综合征	2014	137		67	31.292	15.05	3	13	32	36	23	21	5	4	0	0	36	8	129	21	3	0	0	0	3	0	1	29	11	20	0	2	0	2	5	4	13	11	1	0	2	2	0	0	0	3	0	0
65	拉伦氏综合征	2014	5		1	13.6	3.91152	0	2	3	0	0	0	0	0	0	0	5	0	5	0	1	0	0	0	0	0	0	0	0	0	0	0	0	2	0	0	1	1	0	0	0	0	0	0	0	0	0	0
66	早老症	2014	15		9	22.4	16.578	3	4	1	1	5	1	0	0	0	0	6	4	11	7	0	0	0	0	0	0	0	0	0	0	0	0	0	0	0	1	1	5	0	0	0	1	0	0	0	0	0	0
67	全羧化酶合成酶缺乏症	2014	0	未查询到此病	0	0	0	0	0	0	0	0	0	0	0	0	0	0	0	0	0	0	0	0	0	0	0	0	0	0	0	0	0	0	0	0	0	0	0	0	0	0	0	0	0	0	0	0	0
68	四氢生物蝶呤缺乏症	2014	0	未查询到此病	0	0	0	0	0	0	0	0	0	0	0	0	0	0	0	0	0	0	0	0	0	0	0	0	0	0	0	0	0	0	0	0	0	0	0	0	0	0	0	0	0	0	0	0	0
69	苯丙酮尿症	2014	122		71	4.38525	10.1619	94	18	4	3	0	2	0	1	0	0	21	9	113	89	4	3	0	0	0	0	1	1	1	0	0	0	0	1	3	2	1	3	0	0	0	0	0	1	0	8	3	0
70	高苯丙氨酸血症	2014	79		36	3.1519	9.94225	69	5	2	1	0	1	0	1	0	0	10	0	79	73	0	0	0	0	0	0	0	1	0	0	0	0	0	1	0	0	0	0	0	0	0	2	0	0	0	0	0	1
71	酪氨酸血症	2014	8		5	10.875	26.8138	5	2	0	0	0	0	0	0	1	0	7	0	8	1	0	0	0	0	0	0	0	3	0	0	0	0	0	0	0	1	2	0	0	0	0	0	0	0	0	0	0	1
72	斑驳病	2014	0	未查询到此病	0	0	0	0	0	0	0	0	0	0	0	0	0	0	0	0	0	0	0	0	0	0	0	0	0	0	0	0	0	0	0	0	0	0	0	0	0	0	0	0	0	0	0	0	0
73	Chediak-Higashi综合征	2014	0	未查询到此病	0	0	0	0	0	0	0	0	0	0	0	0	0	0	0	0	0	0	0	0	0	0	0	0	0	0	0	0	0	0	0	0	0	0	0	0	0	0	0	0	0	0	0	0	0
74	白化病	2014	166		91	23.1928	25.0749	67	17	11	21	15	9	9	9	7	1	46	18	148	27	5	1	0	0	5	1	1	8	2	7	0	2	0	56	11	4	15	2	0	0	2	10	0	1	0	0	0	1
75	多种酰基辅酶A脱氢酶缺乏症	2014	0	未查询到此病	0	0	0	0	0	0	0	0	0	0	0	0	0	0	0	0	0	0	0	0	0	0	0	0	0	0	0	0	0	0	0	0	0	0	0	0	0	0	0	0	0	0	0	0	0
76	枫糖尿症	2014	16		11	39.6875	28.4247	4	1	0	2	0	4	2	2	1	0	8	3	13	5	4	0	0	0	0	0	0	3	0	0	0	0	0	0	0	1	0	0	0	0	0	0	0	2	0	0	0	0
77	异戊酸血症	2014	0	未查询到此病	0	0	0	0	0	0	0	0	0	0	0	0	0	0	0	0	0	0	0	0	0	0	0	0	0	0	0	0	0	0	0	0	0	0	0	0	0	0	0	0	0	0	0	0	0
78	丙酸血症	2014	29		18	1.41379	2.38323	27	2	0	0	0	0	0	0	0	0	13	2	27	11	0	0	0	0	1	0	0	1	0	0	0	0	0	6	4	0	0	0	0	0	0	0	0	0	0	4	1	0
79	甲基丙二酸血症	2014	237		132	4.10127	7.51653	171	53	6	4	1	2	0	0	0	0	21	32	205	116	0	2	0	0	11	5	0	20	0	0	0	0	0	32	25	8	0	4	0	0	0	0	0	0	0	14	0	0
80	长链3-羟酰基辅酶A脱氢酶缺乏症	2014	0	未查询到此病	0	0	0	0	0	0	0	0	0	0	0	0	0	0	0	0	0	0	0	0	0	0	0	0	0	0	0	0	0	0	0	0	0	0	0	0	0	0	0	0	0	0	0	0	0
81	中链酰基辅酶A脱氢酶缺乏症	2014	0	未查询到此病	0	0	0	0	0	0	0	0	0	0	0	0	0	0	0	0	0	0	0	0	0	0	0	0	0	0	0	0	0	0	0	0	0	0	0	0	0	0	0	0	0	0	0	0	0
82	极长链酰基辅酶A脱氢酶缺乏症	2014	0	未查询到此病	0	0	0	0	0	0	0	0	0	0	0	0	0	0	0	0	0	0	0	0	0	0	0	0	0	0	0	0	0	0	0	0	0	0	0	0	0	0	0	0	0	0	0	0	0
83	肾上腺脑白质营养不良	2014	47		42	17.0851	14.6922	4	24	6	6	3	4	0	0	0	0	30	3	44	11	0	0	0	0	0	1	1	7	0	0	0	2	0	5	0	2	5	4	1	0	1	1	0	1	0	0	1	0
84	原发性肉碱缺乏症	2014	31		25	10.871	12.347	11	13	5	0	1	0	1	0	0	0	17	2	29	19	0	0	0	0	0	0	0	3	0	0	0	1	0	0	0	0	2	3	0	0	0	0	0	0	0	2	0	0
85	鸟氨酸氨甲酰基转移酶缺乏症	2014	0	未查询到此病	0	0	0	0	0	0	0	0	0	0	0	0	0	0	0	0	0	0	0	0	0	0	0	0	0	0	0	0	0	0	0	0	0	0	0	0	0	0	0	0	0	0	0	0	0
86	N – 乙酰谷氨酸合成酶缺乏症	2014	0	未查询到此病	0	0	0	0	0	0	0	0	0	0	0	0	0	0	0	0	0	0	0	0	0	0	0	0	0	0	0	0	0	0	0	0	0	0	0	0	0	0	0	0	0	0	0	0	0
87	瓜氨酸血症	2014	29		23	21.0345	20.4232	11	4	0	1	12	1	0	0	0	0	12	6	23	5	0	0	0	0	4	0	0	5	0	0	0	0	0	1	1	0	1	0	0	0	0	1	0	0	0	11	0	0
88	戊二酸血症Ⅰ型	2014	0	未查询到此病	0	0	0	0	0	0	0	0	0	0	0	0	0	0	0	0	0	0	0	0	0	0	0	0	0	0	0	0	0	0	0	0	0	0	0	0	0	0	0	0	0	0	0	0	0
89	精氨酸酶缺乏症	2014	1		1	17	NA	0	0	1	0	0	0	0	0	0	0	1	0	1	1	0	0	0	0	0	0	0	0	0	0	0	0	0	0	0	0	0	0	0	0	0	0	0	0	0	0	0	0
90	糖原累积病	2014	611		399	22.1146	23.42	251	71	38	71	56	46	40	21	13	4	42	107	504	86	0	0	0	0	2	0	0	50	0	3	0	16	0	15	0	23	30	354	15	0	2	0	0	1	0	5	1	0
91	遗传性果糖不耐受症	2014	1		0	13	NA	0	1	0	0	0	0	0	0	0	0	1	0	1	0	0	0	0	0	0	0	0	0	0	0	0	0	0	0	0	0	0	0	1	0	0	0	0	0	0	0	0	0
92	半乳糖血症	2014	5		3	0	0	5	0	0	0	0	0	0	0	0	0	4	0	5	3	0	0	0	0	0	0	0	0	0	0	0	0	0	0	0	0	2	0	0	0	0	0	0	0	0	0	0	0
93	伴钙化与囊变的脑白质病	2014	0	未查询到此病	0	0	0	0	0	0	0	0	0	0	0	0	0	0	0	0	0	0	0	0	0	0	0	0	0	0	0	0	0	0	0	0	0	0	0	0	0	0	0	0	0	0	0	0	0
94	山德霍夫氏病	2014	0	未查询到此病	0	0	0	0	0	0	0	0	0	0	0	0	0	0	0	0	0	0	0	0	0	0	0	0	0	0	0	0	0	0	0	0	0	0	0	0	0	0	0	0	0	0	0	0	0
95	GM1神经节苷脂贮积症	2014	0	未查询到此病	0	0	0	0	0	0	0	0	0	0	0	0	0	0	0	0	0	0	0	0	0	0	0	0	0	0	0	0	0	0	0	0	0	0	0	0	0	0	0	0	0	0	0	0	0
96	卡纳万型脑白质营养不良	2014	0	未查询到此病	0	0	0	0	0	0	0	0	0	0	0	0	0	0	0	0	0	0	0	0	0	0	0	0	0	0	0	0	0	0	0	0	0	0	0	0	0	0	0	0	0	0	0	0	0
97	亚历山大病	2014	0	未查询到此病	0	0	0	0	0	0	0	0	0	0	0	0	0	0	0	0	0	0	0	0	0	0	0	0	0	0	0	0	0	0	0	0	0	0	0	0	0	0	0	0	0	0	0	0	0
98	巨脑型脑白质营养不良	2014	0	未查询到此病	0	0	0	0	0	0	0	0	0	0	0	0	0	0	0	0	0	0	0	0	0	0	0	0	0	0	0	0	0	0	0	0	0	0	0	0	0	0	0	0	0	0	0	0	0
99	克拉贝病	2014	1		1	1	NA	1	0	0	0	0	0	0	0	0	0	1	0	1	0	0	0	0	0	0	0	0	0	0	0	0	0	0	0	0	0	1	0	0	0	0	0	0	0	0	0	0	0
100	戈谢病	2014	69		45	23.2609	26.3392	25	14	5	6	2	4	3	6	4	0	22	11	58	14	2	0	0	0	2	0	1	3	2	1	0	1	0	0	6	5	10	17	1	0	0	1	0	0	0	0	0	0
101	佩梅病	2014	0	未查询到此病	0	0	0	0	0	0	0	0	0	0	0	0	0	0	0	0	0	0	0	0	0	0	0	0	0	0	0	0	0	0	0	0	0	0	0	0	0	0	0	0	0	0	0	0	0
102	尼曼匹克病	2014	41		23	16.0976	20.4607	17	9	5	4	2	0	2	0	2	0	20	3	38	8	1	0	0	0	0	5	0	6	0	0	0	0	0	7	5	0	5	0	0	0	0	1	0	1	0	0	0	0
103	异染性脑白质营养不良	2014	6		3	11.6667	17.282	4	0	0	1	1	0	0	0	0	0	6	0	6	2	0	0	0	0	0	0	0	1	0	0	0	0	0	0	0	0	1	1	0	0	0	0	0	0	0	1	0	0
104	法布雷病	2014	34		27	31.6765	11.9512	0	2	8	8	13	2	1	0	0	0	10	1	33	13	0	0	0	0	5	0	0	14	0	0	0	0	0	0	0	0	0	2	0	0	0	0	0	0	0	0	0	0
105	神经元蜡样质脂褐素沉积症	2014	10		5	9.6	6.9634	2	6	1	1	0	0	0	0	0	0	4	0	10	8	0	0	0	0	1	0	0	0	0	0	0	0	0	0	0	0	0	0	0	0	0	0	0	0	0	0	0	0
106	黏多糖贮积症	2014	391		236	51.5703	22.6693	18	24	9	32	41	49	89	75	44	10	28	79	312	10	0	0	0	0	338	2	1	3	1	0	0	0	0	6	1	3	5	10	1	0	0	3	0	0	0	3	0	1
107	家族性高乳糜微粒血症	2014	0	10个疾病名称无”家族性”	0	0	0	0	0	0	0	0	0	0	0	0	0	0	0	0	0	0	0	0	0	0	0	0	0	0	0	0	0	0	0	0	0	0	0	0	0	0	0	0	0	0	0	0	0
108	线粒体胃肠脑肌病	2014	0	未查询到此病	0	0	0	0	0	0	0	0	0	0	0	0	0	0	0	0	0	0	0	0	0	0	0	0	0	0	0	0	0	0	0	0	0	0	0	0	0	0	0	0	0	0	0	0	0
109	卟啉病	2014	50		16	26.9	12.1121	1	3	21	16	3	4	1	1	0	0	20	7	43	17	1	6	0	0	0	4	0	1	1	0	0	0	0	2	1	4	1	0	2	0	6	3	0	0	0	0	0	0
110	体质性肝功能不良性黄疸	2014	103		76	32.9903	19.257	8	7	24	17	18	9	15	2	3	0	33	2	101	23	1	0	0	0	4	1	0	3	2	0	0	1	0	1	13	33	7	7	1	0	0	2	0	2	0	1	1	0
111	遗传性低镁血症	2014	0	未查询到此病	0	0	0	0	0	0	0	0	0	0	0	0	0	0	0	0	0	0	0	0	0	0	0	0	0	0	0	0	0	0	0	0	0	0	0	0	0	0	0	0	0	0	0	0	0
112	肝豆状核变性	2014	1433		773	23.9156	13.275	58	337	420	327	184	75	20	10	2	0	71	233	1200	158	15	5	0	0	29	30	9	186	10	45	0	61	0	75	81	82	142	228	18	0	9	189	0	21	0	3	7	1
113	门克斯病	2014	4		4	11.5	19.7062	3	0	0	0	1	0	0	0	0	0	3	0	4	1	0	0	0	0	0	0	0	0	0	0	0	0	0	0	0	0	2	0	0	0	0	1	0	0	0	0	0	0
114	低碱性磷酸酶血症	2014	3		3	10.3333	16.1967	2	0	0	1	0	0	0	0	0	0	3	0	3	0	0	0	0	0	0	0	0	0	0	0	0	0	0	1	0	0	1	0	0	0	0	0	0	0	0	0	0	0
115	囊性纤维化	2014	39		15	19.8718	20.4967	4	23	4	0	2	3	1	0	1	1	11	18	21	27	0	0	0	0	0	0	0	2	0	1	0	1	0	0	0	3	3	0	0	0	0	2	0	0	0	0	0	0
116	家族性地中海热	2014	15		2	40.8667	31.7892	0	6	1	0	0	0	0	8	0	0	4	3	12	4	0	0	0	0	0	0	0	7	0	0	0	0	0	0	0	0	0	4	0	0	0	0	0	0	0	0	0	0
117	家族性淀粉样周围神经病	2014	7		6	45.4286	18.99	0	0	0	3	1	1	1	0	1	0	6	0	7	2	1	0	0	0	0	0	0	1	0	0	0	0	0	0	1	0	1	0	0	0	0	1	0	0	0	0	0	0
118	遗传性脑类淀粉血管病	2014	0	未查询到此病	0	0	0	0	0	0	0	0	0	0	0	0	0	0	0	0	0	0	0	0	0	0	0	0	0	0	0	0	0	0	0	0	0	0	0	0	0	0	0	0	0	0	0	0	0
119	原发性轻链型淀粉样变性	2014	0	未查询到此病	0	0	0	0	0	0	0	0	0	0	0	0	0	0	0	0	0	0	0	0	0	0	0	0	0	0	0	0	0	0	0	0	0	0	0	0	0	0	0	0	0	0	0	0	0
120	家族性高胆固醇血症	2014	1610		801	58.9857	13.9515	1	8	23	57	124	350	480	357	192	18	28	42	1568	43	1	0	0	0	4	0	0	11	1	3	0	0	0	0	1	3	4	10	0	0	0	0	0	0	0	0	0	0
121	假性甲状旁腺功能减低症	2014	92		52	18.1413	13.6523	12	33	24	13	7	1	1	0	1	0	40	2	90	11	4	0	0	0	4	1	4	7	3	5	0	2	0	5	14	5	7	2	0	0	0	9	0	2	0	1	4	1
122	遗传性低血磷性佝偻病	2014	0	38个疾病名称无“遗传性”	0	0	0	0	0	0	0	0	0	0	0	0	0	0	0	0	0	0	0	0	0	0	0	0	0	0	0	0	0	0	0	0	0	0	0	0	0	0	0	0	0	0	0	0	0
123	ACTH非依赖性大结节样肾上腺增生	2014	0	未查询到此病	0	0	0	0	0	0	0	0	0	0	0	0	0	0	0	0	0	0	0	0	0	0	0	0	0	0	0	0	0	0	0	0	0	0	0	0	0	0	0	0	0	0	0	0	0
124	原发性色素性结节样肾上腺病	2014	12		6	35.0833	14.588	0	0	3	3	1	5	0	0	0	0	8	0	12	1	0	0	0	0	1	0	1	3	0	0	0	0	0	0	1	1	0	1	0	0	0	0	0	0	0	3	0	0
125	甲状腺激素抵抗综合征	2014	33		16	37.5758	20.4985	3	1	5	6	6	4	4	4	0	0	17	2	31	0	0	0	0	0	1	0	0	8	1	2	0	1	0	4	2	0	5	1	0	0	1	0	0	0	0	1	0	1
126	低促性腺激素性性腺功能减退症	2014	424		309	25.4434	11.6026	1	28	224	101	39	12	13	6	0	0	34	31	393	5	16	0	0	0	10	0	3	76	37	12	0	16	0	11	71	32	13	66	15	0	3	3	0	3	0	2	0	0
127	果糖-1，6-二磷酸酶缺乏症	2014	0	8个疾病名称无完全匹配仅有“果糖代谢紊乱”	0	0	0	0	0	0	0	0	0	0	0	0	0	0	0	0	0	0	0	0	0	0	0	0	0	0	0	0	0	0	0	0	0	0	0	0	0	0	0	0	0	0	0	0	0
128	丙酮酸脱氢酶E1-a缺乏症	2014	0	30个疾病名称无完全匹配仅有“丙酮酸羧化酶缺乏”	0	0	0	0	0	0	0	0	0	0	0	0	0	0	0	0	0	0	0	0	0	0	0	0	0	0	0	0	0	0	0	0	0	0	0	0	0	0	0	0	0	0	0	0	0
129	a1－抗胰蛋白酶缺乏症	2014	3		3	43	32.909	0	0	2	0	0	0	0	0	1	0	2	1	2	1	0	0	0	0	0	0	0	0	0	0	0	2	0	0	0	0	0	0	0	0	0	0	0	0	0	0	0	0
130	亨廷顿舞蹈症	2014	52		28	48.9038	14.1577	0	2	2	4	6	21	13	4	0	0	27	1	51	14	2	0	0	0	6	0	1	3	1	2	0	0	0	0	6	3	0	2	0	0	0	7	0	2	0	1	0	1
131	脊髓小脑性共济失调	2014	44		26	43.0909	19.1734	0	3	4	9	8	7	7	4	0	2	22	0	44	6	2	0	0	0	0	0	0	2	0	5	0	8	0	0	5	4	4	3	1	0	0	0	0	1	0	0	0	0
132	遗传性共济失调	2014	189		114	42.4392	16.3503	2	10	14	28	40	53	34	3	1	4	53	14	175	13	2	1	0	0	8	3	1	18	4	5	0	6	0	29	5	6	22	21	6	0	10	10	0	5	0	7	0	4
133	弗里德赖希共济失调	2014	10		4	31.1	14.2786	0	1	3	2	2	2	0	0	0	0	4	0	10	0	0	0	0	0	0	0	0	0	0	0	0	0	0	0	7	1	0	0	1	0	0	0	0	0	0	0	0	0
134	毛细血管扩张共济失调症	2014	4		2	31	34.2053	0	2	0	1	0	0	0	0	1	0	3	0	4	2	0	0	0	0	0	0	0	1	0	0	0	0	0	0	0	1	0	0	0	0	0	0	0	0	0	0	0	0
135	遗传性痉挛性截瘫	2014	144		103	32.1319	15.3396	3	13	39	34	24	16	12	3	0	0	42	6	138	40	1	0	0	0	4	0	1	9	2	1	0	2	0	7	12	9	4	19	1	0	11	11	0	3	0	6	0	0
136	运动神经元病	2014	2030		1331	55.8256	13.9117	10	11	39	70	238	486	627	424	118	7	70	200	1830	432	33	13	0	0	78	54	39	108	48	98	0	70	0	122	152	132	110	119	18	0	51	201	0	36	0	32	3	8
137	脊延髓肌萎缩症	2014	42		41	48.3571	14.0727	0	1	1	2	12	10	13	1	2	0	21	2	40	21	0	0	0	0	0	4	0	0	0	2	0	1	0	2	3	2	2	5	0	0	0	0	0	0	0	0	0	0
138	脊髓性肌萎缩症	2014	199		130	23.3015	25.2038	81	21	16	18	12	14	21	12	2	2	49	6	193	39	4	0	0	0	10	3	4	19	0	1	0	8	0	13	12	3	12	18	6	0	8	8	0	2	0	10	0	1
139	帕金森病（青年型、早发性）	2014	149	年龄小于40	89	35.9396	4.21103	0	0	4	39	106	0	0	0	0	0	35	10	139	47	2	0	0	0	3	4	1	14	2	2	0	2	0	2	11	21	9	9	0	0	1	9	0	5	0	3	0	0
140	苍白球脑桥黑质变性	2014	10		6	43.8	28.8436	1	1	1	1	0	1	3	0	2	0	8	0	10	2	0	0	0	0	1	0	0	0	0	0	0	1	0	0	1	1	2	1	0	0	0	0	0	0	0	0	0	0
141	遗传性肌张力不全	2014	14		2	27.3571	23.6988	1	5	1	1	4	0	0	1	1	0	8	0	14	0	0	0	0	0	0	0	0	0	0	0	0	1	0	0	0	5	2	2	1	0	0	1	0	1	0	0	0	0
142	额颞叶痴呆	2014	49		26	63.0408	12.5498	0	0	1	0	2	5	18	13	8	2	21	2	47	0	0	0	0	0	2	0	3	3	1	1	0	8	0	0	4	1	3	10	1	0	1	2	0	2	0	1	0	0
143	亚急性坏死性脑脊髓病	2014	145		98	47.1862	21.2658	8	11	5	11	20	27	32	22	9	0	18	19	126	9	0	0	0	0	0	19	0	1	35	0	0	0	0	64	0	1	1	1	1	0	0	2	0	0	0	2	0	0
144	路易体痴呆	2014	146		87	73.8219	9.88603	0	0	0	0	1	5	19	43	61	17	34	16	130	40	3	1	0	0	10	1	9	5	0	15	0	5	0	1	5	2	2	31	1	0	0	14	0	0	0	1	0	0
145	高血钾型周期性瘫痪	2014	3		3	6.66667	0.57735	0	3	0	0	0	0	0	0	0	0	2	1	2	0	0	0	0	0	0	0	0	0	0	0	0	0	0	0	0	0	2	1	0	0	0	0	0	0	0	0	0	0
146	肌阵挛性癫痫伴破碎红纤维（MERRF）	2014	0	未查询到此病	0	0	0	0	0	0	0	0	0	0	0	0	0	0	0	0	0	0	0	0	0	0	0	0	0	0	0	0	0	0	0	0	0	0	0	0	0	0	0	0	0	0	0	0	0
147	常染色体显性遗传性癫痫伴听觉特征	2014	0	未查询到此病	0	0	0	0	0	0	0	0	0	0	0	0	0	0	0	0	0	0	0	0	0	0	0	0	0	0	0	0	0	0	0	0	0	0	0	0	0	0	0	0	0	0	0	0	0
148	常染色体显性遗传性夜发性额叶癫痫	2014	1		0	18	NA	0	0	1	0	0	0	0	0	0	0	1	0	1	0	0	0	0	0	0	0	0	0	0	0	0	0	0	0	0	0	0	1	0	0	0	0	0	0	0	0	0	0
149	良性家族性新生儿婴儿惊厥	2014	1		1	2	NA	1	0	0	0	0	0	0	0	0	0	1	0	1	0	0	0	0	0	0	0	0	0	0	0	0	0	0	0	1	0	0	0	0	0	0	0	0	0	0	0	0	0
150	青少年肌阵挛癫痫	2014	14		8	15.8571	5.69557	0	7	7	0	0	0	0	0	0	0	6	0	14	0	0	0	0	0	1	0	0	1	0	0	0	0	0	0	0	0	0	11	1	0	0	0	0	0	0	0	0	0
151	Lennox-Gastaut 综合征	2014	66		42	7.09091	6.29463	30	27	8	1	0	0	0	0	0	0	15	8	58	41	0	1	0	0	0	0	0	2	0	0	0	1	0	0	0	1	2	5	0	0	0	0	0	0	0	0	0	0
152	婴儿严重肌阵挛性癫痫	2014	31		14	2.35484	2.02564	29	2	0	0	0	0	0	0	0	0	10	5	26	0	0	0	0	0	0	0	1	1	0	0	0	0	0	0	2	0	20	1	2	0	0	0	0	1	0	2	0	0
153	维生素B6依赖性癫痫	2014	0	未查询到此病	0	0	0	0	0	0	0	0	0	0	0	0	0	0	0	0	0	0	0	0	0	0	0	0	0	0	0	0	0	0	0	0	0	0	0	0	0	0	0	0	0	0	0	0	0
154	早发家族性偏瘫型偏头痛	2014	1		1	51	NA	0	0	0	0	0	1	0	0	0	0	1	0	1	0	0	0	0	0	0	0	0	0	0	0	0	0	0	0	0	0	0	1	0	0	0	0	0	0	0	0	0	0
155	发作性睡病	2014	529		382	18.7429	17.4849	12	346	45	29	34	30	16	14	2	1	50	14	515	129	1	1	0	0	29	3	8	34	3	30	0	2	0	43	179	13	19	10	0	0	2	10	0	3	0	7	0	0
156	遗传性感觉神经病	2014	9		8	36.3333	24.9499	1	2	0	1	1	0	4	0	0	0	5	0	9	6	0	0	0	0	2	0	0	0	0	1	0	0	0	0	0	0	0	0	0	0	0	0	0	0	0	0	0	0
157	遗传性运动神经病	2014	21		15	27.5714	24.1735	4	5	3	2	1	2	2	1	1	0	12	2	19	11	0	0	0	0	0	0	0	1	0	0	0	0	0	0	2	0	0	1	0	0	0	6	0	0	0	0	0	0
158	遗传性自主神经病	2014	0	未查询到此病	0	0	0	0	0	0	0	0	0	0	0	0	0	0	0	0	0	0	0	0	0	0	0	0	0	0	0	0	0	0	0	0	0	0	0	0	0	0	0	0	0	0	0	0	0
159	腓骨肌萎缩症	2014	117		78	38.5641	18.1124	0	8	23	21	18	23	15	5	4	0	43	8	109	25	5	1	0	0	3	2	4	12	2	6	0	1	0	9	7	2	9	11	0	0	3	5	0	2	0	2	1	0
160	巨轴索神经病	2014	1		1	52	NA	0	0	0	0	0	1	0	0	0	0	1	0	1	1	0	0	0	0	0	0	0	0	0	0	0	0	0	0	0	0	0	0	0	0	0	0	0	0	0	0	0	0
161	多灶性运动神经病	2014	61		43	50.3443	13.3052	0	1	2	3	12	18	17	6	2	0	22	9	52	18	1	0	0	0	0	0	1	5	0	5	0	1	0	2	6	1	6	4	2	0	6	0	0	0	0	0	0	0
162	慢性炎性脱髓鞘性多发神经病	2014	696		431	46.6724	19.3463	18	29	66	84	65	147	170	71	44	2	63	112	584	146	16	2	0	0	8	10	24	84	9	36	0	28	0	16	21	42	57	48	11	0	19	93	0	14	0	6	3	1
163	先天性肌无力综合征	2014	2		2	39.5	47.3762	0	1	0	0	0	0	0	1	0	0	2	0	2	1	0	0	0	0	0	0	0	0	0	0	0	0	0	0	0	0	1	0	0	0	0	0	0	0	0	0	0	0
164	线粒体脑肌病伴高乳酸血症和脑卒中样发作（MELAS）	2014	105		54	24.1905	14.1694	5	27	33	14	14	7	5	0	0	0	13	10	95	85	2	0	0	0	0	1	0	0	0	1	0	3	0	0	0	2	1	0	0	0	0	10	0	0	0	0	0	0
165	肢带型肌营养不良1型	2014	0	未查询到此病	0	0	0	0	0	0	0	0	0	0	0	0	0	0	0	0	0	0	0	0	0	0	0	0	0	0	0	0	0	0	0	0	0	0	0	0	0	0	0	0	0	0	0	0	0
166	肢带型肌营养不良2型	2014	0	未查询到此病	0	0	0	0	0	0	0	0	0	0	0	0	0	0	0	0	0	0	0	0	0	0	0	0	0	0	0	0	0	0	0	0	0	0	0	0	0	0	0	0	0	0	0	0	0
167	抗肌萎缩蛋白病	2014	421		319	18.6452	18.8242	123	112	51	42	36	25	25	6	0	0	62	41	380	42	10	2	0	0	19	3	10	18	4	12	0	9	0	25	54	27	30	41	26	0	9	21	0	5	0	14	4	1
168	远端性肌病	2014	11		8	31	10.4499	0	0	4	1	5	1	0	0	0	0	7	0	11	8	0	0	0	0	0	0	0	1	0	0	0	0	0	0	0	0	0	1	0	0	0	1	0	0	0	0	0	0
169	中央核肌病	2014	0	未查询到此病	0	0	0	0	0	0	0	0	0	0	0	0	0	0	0	0	0	0	0	0	0	0	0	0	0	0	0	0	0	0	0	0	0	0	0	0	0	0	0	0	0	0	0	0	0
170	中央轴空病	2014	0	未查询到此病	0	0	0	0	0	0	0	0	0	0	0	0	0	0	0	0	0	0	0	0	0	0	0	0	0	0	0	0	0	0	0	0	0	0	0	0	0	0	0	0	0	0	0	0	0
171	性连锁肌管肌病	2014	0	未查询到此病	0	0	0	0	0	0	0	0	0	0	0	0	0	0	0	0	0	0	0	0	0	0	0	0	0	0	0	0	0	0	0	0	0	0	0	0	0	0	0	0	0	0	0	0	0
172	软骨萎缩性肌强直	2014	0	未查询到此病	0	0	0	0	0	0	0	0	0	0	0	0	0	0	0	0	0	0	0	0	0	0	0	0	0	0	0	0	0	0	0	0	0	0	0	0	0	0	0	0	0	0	0	0	0
173	埃梅里－德赖弗斯肌营养不良	2014	0	未查询到此病	0	0	0	0	0	0	0	0	0	0	0	0	0	0	0	0	0	0	0	0	0	0	0	0	0	0	0	0	0	0	0	0	0	0	0	0	0	0	0	0	0	0	0	0	0
174	眼咽型肌营养不良	2014	9		5	39.7778	21.7645	0	2	0	2	1	1	2	1	0	0	9	0	9	4	0	0	0	0	0	0	0	1	0	1	0	1	0	1	0	0	1	0	0	0	0	0	0	0	0	0	0	0
175	面肩肱型肌营养不良	2014	19		11	28.7368	16.9012	0	2	10	0	3	1	3	0	0	0	14	1	18	4	0	0	0	0	2	2	0	1	0	0	0	1	0	0	0	1	2	5	0	0	0	0	0	0	0	0	0	0
176	肌强直性肌营养不良	2014	61		36	40.4754	12.5534	2	0	4	11	18	18	8	0	0	0	25	2	59	23	0	0	0	0	3	0	0	3	0	4	0	0	0	14	1	1	1	4	0	0	0	5	0	1	0	0	0	0
177	先天性肌强直	2014	10		9	29.3	23.8842	1	0	6	0	0	0	2	1	0	0	8	0	10	4	0	0	0	0	0	0	0	1	0	0	0	0	0	0	1	0	0	3	0	0	1	0	0	0	0	0	0	0
178	先天性肌营养不良	2014	11		8	8.72727	8.36769	3	5	2	1	0	0	0	0	0	0	6	0	11	9	0	0	0	0	0	0	0	0	0	0	0	0	0	0	0	0	1	0	0	0	0	1	0	0	0	0	0	0
179	杆状体肌病	2014	0	未查询到此病	0	0	0	0	0	0	0	0	0	0	0	0	0	0	0	0	0	0	0	0	0	0	0	0	0	0	0	0	0	0	0	0	0	0	0	0	0	0	0	0	0	0	0	0	0
180	先天性肌型比例失调	2014	0	未查询到此病	0	0	0	0	0	0	0	0	0	0	0	0	0	0	0	0	0	0	0	0	0	0	0	0	0	0	0	0	0	0	0	0	0	0	0	0	0	0	0	0	0	0	0	0	0
181	周期性瘫痪	2014	352		306	34.7188	13.8302	2	20	63	101	91	49	16	7	3	0	62	19	333	41	8	12	0	0	16	18	25	13	12	8	0	3	0	26	76	14	7	5	14	0	2	1	0	6	0	21	1	7
182	低血钾型周期性瘫痪	2014	1130		984	36.4726	14.3282	2	27	216	322	270	167	81	26	14	5	68	26	1104	88	47	4	0	0	28	18	110	71	24	26	0	21	0	49	94	77	79	47	14	0	46	94	0	35	0	40	7	53
183	包涵体肌炎	2014	17		12	56.4706	14.8497	0	0	1	2	0	4	4	5	1	0	9	1	16	5	1	0	0	0	3	0	0	4	0	0	0	0	0	0	3	0	0	0	1	0	0	0	0	0	0	0	0	0
184	遗传性包涵体肌病	2014	1		1	33	NA	0	0	0	1	0	0	0	0	0	0	1	0	1	1	0	0	0	0	0	0	0	0	0	0	0	0	0	0	0	0	0	0	0	0	0	0	0	0	0	0	0	0
185	Lambert-Eaton综合征	2014	130		84	57.2615	16.0631	0	1	7	2	18	18	34	36	12	2	38	9	121	39	4	1	0	0	4	12	6	14	2	1	0	3	0	13	10	2	5	2	2	0	0	1	0	0	0	0	0	2
186	特发性肺纤维化	2014	1470		1001	67.3116	12.7712	0	0	6	18	54	132	358	427	386	89	59	137	1333	165	4	3	0	0	83	41	41	64	55	10	0	12	0	63	164	5	62	34	29	0	43	101	0	7	0	70	0	364
187	进行性家族性肝内胆汁淤积症	2014	0	未查询到此病	0	0	0	0	0	0	0	0	0	0	0	0	0	0	0	0	0	0	0	0	0	0	0	0	0	0	0	0	0	0	0	0	0	0	0	0	0	0	0	0	0	0	0	0	0
188	皮肤松弛症	2014	668		111	49.8922	14.8845	0	4	22	66	153	214	102	52	46	9	43	46	622	539	10	0	0	0	4	9	8	3	6	1	0	7	0	0	8	33	5	17	0	0	3	3	0	4	0	2	0	1
189	先天性厚甲	2014	2		2	4.5	0.707107	1	1	0	0	0	0	0	0	0	0	2	0	2	0	0	0	0	0	0	0	0	0	0	0	0	0	0	0	0	1	1	0	0	0	0	0	0	0	0	0	0	0
190	遗传性色素性皮肤病	2014	26		17	58	16.3218	0	0	1	1	2	9	4	3	5	1	12	1	25	0	0	0	0	0	4	2	0	1	0	0	0	0	0	2	0	0	3	2	0	0	3	0	0	0	0	3	0	0
191	毛囊闭锁三联症	2014	15		15	27	12.3809	0	0	9	3	1	1	1	0	0	0	9	4	11	6	0	0	0	0	1	1	0	1	1	0	0	0	0	0	2	0	1	0	0	0	0	0	0	0	0	0	0	0
192	结节性多动脉炎	2014	158		101	47.8924	17.9062	2	4	11	18	37	25	27	24	10	0	44	25	133	28	2	1	0	0	17	8	1	6	4	8	0	2	0	6	14	8	8	20	5	0	2	2	0	1	0	0	0	0
193	系统性硬化病	2014	1522		286	51.4915	13.8204	2	10	52	125	229	445	415	190	49	5	66	321	1201	374	102	20	0	0	121	69	60	48	3	123	0	34	0	51	11	55	209	22	24	0	1	57	0	65	0	6	13	1
194	免疫性坏死性肌肉病	2014	48		29	47.75	18.082	1	1	3	6	9	12	6	8	1	1	12	1	47	16	0	0	0	0	0	0	0	0	0	0	0	0	0	1	0	11	1	0	0	0	1	18	0	0	0	0	0	0
195	进行性骨化性肌炎	2014	10		2	37.4	24.2725	1	2	1	0	0	3	3	0	0	0	7	0	10	4	0	0	0	0	0	0	1	0	1	1	0	0	0	0	0	0	2	0	0	0	0	1	0	0	0	0	0	0
196	骨膜增生厚皮症	2014	17		15	30.6471	12.3184	0	0	7	6	1	2	1	0	0	0	9	0	17	8	1	0	0	0	0	0	0	0	2	0	0	1	0	0	0	0	2	0	0	0	0	2	0	0	0	0	0	0
197	变形综合征	2014	0	未查询到此病	0	0	0	0	0	0	0	0	0	0	0	0	0	0	0	0	0	0	0	0	0	0	0	0	0	0	0	0	0	0	0	0	0	0	0	0	0	0	0	0	0	0	0	0	0
198	淋巴管肌瘤病	2014	28		2	42.0357	11.9334	0	0	4	5	4	10	5	0	0	0	18	2	26	10	1	0	0	0	2	3	1	0	1	1	0	1	0	0	0	1	3	2	0	0	0	2	0	0	0	0	0	0
199	多巴反应性肌张力不全	2014	30		10	28.1	17.4442	1	10	2	3	10	3	1	0	0	0	14	4	26	2	0	0	0	0	3	0	0	3	0	0	0	2	0	0	2	2	4	4	3	0	0	1	0	0	0	0	0	0
200	先天性脊柱侧凸	2014	802		353	15.4314	16.98	215	339	108	45	22	27	18	18	8	2	62	29	773	304	0	1	0	0	14	4	7	6	139	2	0	6	0	77	26	26	33	53	11	0	5	36	0	3	0	9	5	4
201	常染色体隐性遗传激素抵抗肾病综合征	2014	0	43213个名称不完全匹配仅有“肾病综合征”	0	0	0	0	0	0	0	0	0	0	0	0	0	0	0	0	0	0	0	0	0	0	0	0	0	0	0	0	0	0	0	0	0	0	0	0	0	0	0	0	0	0	0	0	0
202	常染色体显性遗传激素抵抗肾病综合征	2014	0	43213个名称不完全匹配仅有“肾病综合征”	0	0	0	0	0	0	0	0	0	0	0	0	0	0	0	0	0	0	0	0	0	0	0	0	0	0	0	0	0	0	0	0	0	0	0	0	0	0	0	0	0	0	0	0	0
203	先天性肾性尿崩症	2014	0	未查询到此病	0	0	0	0	0	0	0	0	0	0	0	0	0	0	0	0	0	0	0	0	0	0	0	0	0	0	0	0	0	0	0	0	0	0	0	0	0	0	0	0	0	0	0	0	0
204	Lowe综合征	2014	12		9	6	11.7783	10	1	0	0	1	0	0	0	0	0	8	0	12	6	0	0	0	0	1	0	0	2	0	0	0	0	0	0	0	0	0	1	0	0	0	1	0	0	0	0	0	0
205	多发性大动脉炎	2014	752		182	34.5824	17.7944	15	87	141	173	125	97	65	34	14	1	65	159	593	230	22	0	0	0	21	9	44	67	27	5	0	14	0	57	79	24	11	30	0	0	3	53	0	4	0	32	4	2
206	遗传性囊性肾病	2014	0	未查询到此病	0	0	0	0	0	0	0	0	0	0	0	0	0	0	0	0	0	0	0	0	0	0	0	0	0	0	0	0	0	0	0	0	0	0	0	0	0	0	0	0	0	0	0	0	0
207	特发性结节样肾小球硬化	2014	1		1	33	NA	0	0	0	1	0	0	0	0	0	0	1	0	1	0	0	0	0	0	0	0	0	0	0	0	0	0	0	0	0	0	0	0	0	0	0	0	0	1	0	0	0	0
208	永久性新生儿糖尿病	2014	0	未查询到此病	0	0	0	0	0	0	0	0	0	0	0	0	0	0	0	0	0	0	0	0	0	0	0	0	0	0	0	0	0	0	0	0	0	0	0	0	0	0	0	0	0	0	0	0	0
209	Joubert 综合征	2014	0	未查询到此病	0	0	0	0	0	0	0	0	0	0	0	0	0	0	0	0	0	0	0	0	0	0	0	0	0	0	0	0	0	0	0	0	0	0	0	0	0	0	0	0	0	0	0	0	0
210	无虹膜症	2014	66		25	20.3788	20.1661	23	7	12	9	5	5	3	2	0	0	13	9	57	32	0	3	0	0	1	1	1	2	0	0	0	0	0	4	0	3	0	18	0	0	0	1	0	0	0	0	0	0
211	Alagille 综合征	2014	439		283	55.1253	20.8012	22	15	11	8	36	72	111	103	51	10	46	59	380	69	2	2	0	0	2	1	8	21	14	14	0	4	0	55	1	9	34	126	3	0	2	6	0	6	0	45	3	9
212	常染色体隐性遗传多囊肾病	2014	1		1	76	NA	0	0	0	0	0	0	0	0	1	0	1	0	1	0	0	0	0	0	1	0	0	0	0	0	0	0	0	0	0	0	0	0	0	0	0	0	0	0	0	0	0	0
213	轴前肢端骨发育不全	2014	0	未查询到此病	0	0	0	0	0	0	0	0	0	0	0	0	0	0	0	0	0	0	0	0	0	0	0	0	0	0	0	0	0	0	0	0	0	0	0	0	0	0	0	0	0	0	0	0	0
214	软骨发育不良	2014	116		67	8.62931	17.2599	84	12	3	6	3	2	3	2	1	0	31	14	102	21	0	0	0	0	3	1	2	8	11	0	0	1	0	3	4	2	35	1	3	0	0	1	0	3	0	12	1	0
215	软骨发育不全	2014	43		24	3.86047	6.49022	29	11	2	1	0	0	0	0	0	0	19	3	40	0	0	0	0	0	0	0	0	5	0	0	0	7	0	3	6	2	0	4	4	0	0	3	0	0	0	6	0	0
216	成骨不全症	2014	238		124	11.2311	9.96456	51	142	19	16	5	3	2	0	0	0	33	60	178	19	1	0	0	0	8	1	0	11	1	1	0	2	0	129	6	6	9	3	1	0	8	9	0	0	0	0	0	0
217	McCune-Albright 综合征	2014	63		20	16.127	14.1826	9	35	4	5	5	5	0	0	0	0	20	7	56	19	0	0	0	0	1	0	1	18	0	4	0	0	0	7	1	0	1	5	1	0	0	1	0	0	0	0	0	0
218	多发性骨骺发育不良	2014	28		16	12.1429	7.6532	3	16	7	2	0	0	0	0	0	0	11	0	28	19	0	0	0	0	2	1	0	0	1	0	0	0	0	0	2	0	0	1	1	0	1	0	0	0	0	0	0	0
219	X-连锁鱼鳞病	2014	0	未查询到此病	0	0	0	0	0	0	0	0	0	0	0	0	0	0	0	0	0	0	0	0	0	0	0	0	0	0	0	0	0	0	0	0	0	0	0	0	0	0	0	0	0	0	0	0	0
220	遗传性大疱性表皮松解症	2014	0	未查询到此病	0	0	0	0	0	0	0	0	0	0	0	0	0	0	0	0	0	0	0	0	0	0	0	0	0	0	0	0	0	0	0	0	0	0	0	0	0	0	0	0	0	0	0	0	0
221	掌跖角化症	2014	16		8	42.0625	20.7058	1	0	3	2	1	2	5	2	0	0	12	3	13	4	1	0	0	0	0	1	0	1	0	1	0	0	0	0	1	0	2	1	0	0	0	3	0	0	0	1	0	0
222	着色性干皮病	2014	27		11	28.6667	16.9479	4	3	3	3	12	1	1	0	0	0	11	10	17	14	0	0	0	0	0	0	0	0	0	0	0	0	0	0	2	0	2	0	0	0	0	5	0	0	0	0	0	0
223	色素失禁症	2014	50		8	5.66	14.5091	40	4	2	1	0	1	1	1	0	0	24	3	47	20	0	0	0	0	1	2	1	4	0	0	0	1	0	3	5	2	3	4	1	0	0	1	0	0	0	0	0	0
224	外胚层发育不良	2014	38		27	6.57895	13.2352	27	5	2	1	2	0	1	0	0	0	17	0	38	17	0	0	0	0	3	0	0	4	0	0	0	0	0	4	0	0	1	2	3	0	0	2	0	1	0	0	0	0
225	先天性角化不良	2014	10		8	40.5	19.3003	0	1	2	0	1	2	4	0	0	0	6	3	7	7	0	0	0	0	0	1	0	0	0	0	0	0	0	0	0	0	0	0	0	0	0	2	0	0	0	0	0	0
226	神经纤维瘤	2014	940		471	30.9862	20.4395	59	187	189	126	103	113	99	54	8	2	74	94	846	162	34	6	0	0	21	26	7	29	35	47	0	94	0	74	9	17	153	100	16	0	7	46	0	17	0	9	3	2
227	结节性硬化症	2014	643		353	24.6423	16.8332	119	50	146	170	64	54	31	4	5	0	57	249	394	350	0	0	0	0	23	55	2	48	1	3	0	12	0	36	31	8	20	20	8	0	3	6	0	2	0	2	0	0
228	黑斑息肉综合征	2014	51		21	31.8627	17.7494	0	7	17	8	4	8	5	2	0	0	12	12	39	13	0	0	0	0	0	0	0	2	0	0	0	3	0	8	0	0	19	0	3	0	0	0	0	3	0	0	0	0
229	林岛综合征	2014	41		26	37.2439	11.8148	0	0	5	11	15	6	4	0	0	0	24	4	37	15	6	0	0	0	1	0	0	2	4	1	0	2	0	3	1	1	1	4	0	0	0	0	0	0	0	0	0	0
230	Goldenhar综合征	2014	36		25	6.22222	7.86715	22	7	6	1	0	0	0	0	0	0	8	1	35	26	0	0	0	0	4	0	0	0	0	0	0	0	0	0	0	1	0	1	0	0	0	0	0	2	0	2	0	0
231	歌舞伎面谱综合征	2014	3		1	1.33333	1.52753	3	0	0	0	0	0	0	0	0	0	1	0	3	3	0	0	0	0	0	0	0	0	0	0	0	0	0	0	0	0	0	0	0	0	0	0	0	0	0	0	0	0
232	Fraser综合征	2014	15		11	5.33333	7.30623	9	5	0	1	0	0	0	0	0	0	4	3	12	0	0	0	0	0	0	0	0	0	0	0	0	0	0	7	0	0	0	5	0	0	1	0	0	0	0	2	0	0
233	Silver-Russell 综合征	2014	6		4	6.33333	3.26599	1	5	0	0	0	0	0	0	0	0	1	0	6	6	0	0	0	0	0	0	0	0	0	0	0	0	0	0	0	0	0	0	0	0	0	0	0	0	0	0	0	0
234	德朗热综合征	2014	2		1	23.5	14.8492	0	1	0	1	0	0	0	0	0	0	2	0	2	1	0	0	0	0	0	1	0	0	0	0	0	0	0	0	0	0	0	0	0	0	0	0	0	0	0	0	0	0
235	柯凯因综合征	2014	5		2	10.8	2.77489	0	5	0	0	0	0	0	0	0	0	3	0	5	5	0	0	0	0	0	0	0	0	0	0	0	0	0	0	0	0	0	0	0	0	0	0	0	0	0	0	0	0
236	Noonan综合征	2014	5		4	17.4	18.3657	0	4	0	0	0	1	0	0	0	0	4	0	5	3	0	0	0	0	0	0	0	0	0	0	0	0	0	1	0	0	1	0	0	0	0	0	0	0	0	0	0	0
237	指甲髌骨综合症	2014	1		1	71	NA	0	0	0	0	0	0	0	1	0	0	1	0	1	0	0	0	0	0	0	0	0	0	0	1	0	0	0	0	0	0	0	0	0	0	0	0	0	0	0	0	0	0
238	Rubinstein-Taybi 综合征	2014	1																	1
239	马凡综合征	2014	820		493	29.6768	15.3457	35	112	154	228	142	91	48	8	2	0	65	81	739	252	8	2	0	0	16	16	15	86	20	36	0	28	0	24	30	21	53	109	20	0	9	49	0	5	0	3	0	0
240	威廉姆斯综合征	2014	0	未查询到此病	0	0	0	0	0	0	0	0	0	0	0	0	0	0	0	0	0	0	0	0	0	0	0	0	0	0	0	0	0	0	0	0	0	0	0	0	0	0	0	0	0	0	0	0	0
241	Alport 综合征	2014	102		73	12.7745	10.5257	16	55	18	10	1	1	0	1	0	0	17	6	96	33	2	0	0	0	1	2	0	1	0	0	0	1	0	0	0	29	5	20	0	0	0	1	0	5	0	0	0	0
242	Prader-Willi 综合征	2014	50		23	7.16	6.64358	19	26	3	2	0	0	0	0	0	0	10	8	42	23	0	0	0	0	0	7	0	0	0	0	0	0	0	7	0	0	3	5	0	0	1	0	0	2	0	2	0	0
243	原发性纤毛运动障碍	2014	30		17	27.1333	20.7709	2	9	6	5	1	1	5	0	1	0	17	2	28	2	0	0	0	0	1	0	1	1	1	0	0	4	0	4	1	0	2	0	3	0	0	5	0	1	0	0	0	0
244	猫叫综合征	2014	12		6	7.16667	22.6549	11	0	0	0	0	0	0	0	1	0	10	0	12	1	1	0	0	0	2	0	0	1	0	0	0	0	0	1	3	1	1	0	0	0	0	1	0	0	0	0	0	0
245	Angelman 综合征	2014	12		7	3.5	2.43086	8	4	0	0	0	0	0	0	0	0	7	0	12	3	0	0	0	0	1	2	0	2	0	0	0	0	0	0	0	0	4	0	0	0	0	0	0	0	0	0	0	0
246	特纳综合征	2014	135		0	18.5556	10.2547	8	49	47	15	14	2	0	0	0	0	44	7	128	19	1	0	0	0	1	0	0	13	2	4	0	8	0	3	15	4	9	15	2	0	1	17	0	5	0	3	5	0
247	克氏综合症	2014	47		43	26.766	10.2919	2	3	15	17	9	1	0	0	0	0	27	2	45	11	2	0	0	0	0	2	0	5	4	3	0	3	0	2	2	2	1	2	0	0	0	4	0	0	0	2	0	0
248	脆性X染色体综合征	2014	8		7	17.875	21.2296	3	3	0	0	0	1	1	0	0	0	6	0	8	5	0	0	0	0	0	0	0	0	0	0	0	0	0	0	0	0	1	2	0	0	0	0	0	0	0	0	0	0
249	巴德尔－别德尔综合征	2014	15		1	32	15.9687	1	2	1	4	3	4	0	0	0	0	6	1	14	11	0	0	0	0	0	0	0	0	0	1	0	0	0	0	1	1	0	0	0	0	0	0	0	0	0	0	0	0
250	特发性肺含铁血黄素沉着症	2014	3		2	12.3333	6.50641	0	2	1	0	0	0	0	0	0	0	2	0	3	0	0	0	0	0	0	0	0	0	0	0	0	0	0	0	0	0	0	0	0	0	0	0	0	0	0	0	2	0
251	先天性中枢性低通气综合征	2014	0	5个疾病名称不完全匹配，无“先天性”	0	0	0	0	0	0	0	0	0	0	0	0	0	0	0	0	0	0	0	0	0	0	0	0	0	0	0	0	0	0	0	0	0	0	0	0	0	0	0	0	0	0	0	0	0
252	遗传性支气管扩张	2014	0	未查询到此病	0	0	0	0	0	0	0	0	0	0	0	0	0	0	0	0	0	0	0	0	0	0	0	0	0	0	0	0	0	0	0	0	0	0	0	0	0	0	0	0	0	0	0	0	0
253	IgG4相关性疾病	2014	330		182	53.0424	17.1926	6	8	11	22	28	70	108	52	23	2	35	83	247	34	10	0	0	0	25	0	3	47	25	7	0	7	0	72	10	1	6	47	9	0	0	9	0	0	0	1	0	0
254	Treacher Collins 综合征	2014	19		9	11.2632	7.53394	4	8	7	0	0	0	0	0	0	0	11	0	19	8	0	0	0	0	0	0	0	1	0	0	0	0	0	1	1	0	3	0	0	0	0	3	0	0	0	0	0	0
255	石骨症	2014	65		49	13.6308	19.8428	38	8	3	5	3	4	2	2	0	0	22	24	41	44	0	0	0	0	2	1	0	3	0	0	0	1	0	1	2	3	2	2	0	0	0	2	0	0	0	2	0	0
256	肺静脉闭塞病	2014	15		6	43	21.8632	0	1	2	4	1	2	1	3	1	0	8	0	15	7	0	0	0	0	1	2	0	0	0	1	0	0	0	0	0	0	1	2	0	0	0	0	0	0	0	0	1	0
257	消化道神经内分泌肿瘤	2014	0	未查询到此病	0	0	0	0	0	0	0	0	0	0	0	0	0	0	0	0	0	0	0	0	0	0	0	0	0	0	0	0	0	0	0	0	0	0	0	0	0	0	0	0	0	0	0	0	0
258	胰腺囊性肿瘤	2014	0	未查询到此病	0	0	0	0	0	0	0	0	0	0	0	0	0	0	0	0	0	0	0	0	0	0	0	0	0	0	0	0	0	0	0	0	0	0	0	0	0	0	0	0	0	0	0	0	0
259	X-连锁高IgM血症	2014	0	未查询到此病	0	0	0	0	0	0	0	0	0	0	0	0	0	0	0	0	0	0	0	0	0	0	0	0	0	0	0	0	0	0	0	0	0	0	0	0	0	0	0	0	0	0	0	0	0
260	丙酮酸激酶缺乏症	2014	0	未查询到此病	0	0	0	0	0	0	0	0	0	0	0	0	0	0	0	0	0	0	0	0	0	0	0	0	0	0	0	0	0	0	0	0	0	0	0	0	0	0	0	0	0	0	0	0	0
261	白质消融性白质脑炎	2014	0	未查询到此病	0	0	0	0	0	0	0	0	0	0	0	0	0	0	0	0	0	0	0	0	0	0	0	0	0	0	0	0	0	0	0	0	0	0	0	0	0	0	0	0	0	0	0	0	0
262	遗传性弥漫性白质脑病伴轴索球样变	2014	0	未查询到此病	0	0	0	0	0	0	0	0	0	0	0	0	0	0	0	0	0	0	0	0	0	0	0	0	0	0	0	0	0	0	0	0	0	0	0	0	0	0	0	0	0	0	0	0	0
263	β – 酮硫解酶缺乏症	2014	0	未查询到此病	0	0	0	0	0	0	0	0	0	0	0	0	0	0	0	0	0	0	0	0	0	0	0	0	0	0	0	0	0	0	0	0	0	0	0	0	0	0	0	0	0	0	0	0	0
264	溶酶体酸性脂肪酶缺乏症	2014	0	未查询到此病	0	0	0	0	0	0	0	0	0	0	0	0	0	0	0	0	0	0	0	0	0	0	0	0	0	0	0	0	0	0	0	0	0	0	0	0	0	0	0	0	0	0	0	0	0
265	谷固醇血症	2014	0	未查询到此病	0	0	0	0	0	0	0	0	0	0	0	0	0	0	0	0	0	0	0	0	0	0	0	0	0	0	0	0	0	0	0	0	0	0	0	0	0	0	0	0	0	0	0	0	0
266	神经轴索营养不良	2014	0	未查询到此病	0	0	0	0	0	0	0	0	0	0	0	0	0	0	0	0	0	0	0	0	0	0	0	0	0	0	0	0	0	0	0	0	0	0	0	0	0	0	0	0	0	0	0	0	0
267	家族性发作性运动诱发性运动障碍	2014	0	未查询到此病	0	0	0	0	0	0	0	0	0	0	0	0	0	0	0	0	0	0	0	0	0	0	0	0	0	0	0	0	0	0	0	0	0	0	0	0	0	0	0	0	0	0	0	0	0
268	Ⅵ型胶原蛋白相关肌病	2014	0	未查询到此病	0	0	0	0	0	0	0	0	0	0	0	0	0	0	0	0	0	0	0	0	0	0	0	0	0	0	0	0	0	0	0	0	0	0	0	0	0	0	0	0	0	0	0	0	0
269	肌原纤维肌病	2014	0	未查询到此病	0	0	0	0	0	0	0	0	0	0	0	0	0	0	0	0	0	0	0	0	0	0	0	0	0	0	0	0	0	0	0	0	0	0	0	0	0	0	0	0	0	0	0	0	0
270	结蛋白病	2014	0	未查询到此病	0	0	0	0	0	0	0	0	0	0	0	0	0	0	0	0	0	0	0	0	0	0	0	0	0	0	0	0	0	0	0	0	0	0	0	0	0	0	0	0	0	0	0	0	0
271	先天性胆汁酸合成障碍	2014	0	未查询到此病	0	0	0	0	0	0	0	0	0	0	0	0	0	0	0	0	0	0	0	0	0	0	0	0	0	0	0	0	0	0	0	0	0	0	0	0	0	0	0	0	0	0	0	0	0
272	自身免疫性小肠炎	2014	0	未查询到此病	0	0	0	0	0	0	0	0	0	0	0	0	0	0	0	0	0	0	0	0	0	0	0	0	0	0	0	0	0	0	0	0	0	0	0	0	0	0	0	0	0	0	0	0	0
273	Blau综合征	2014	1		1	8	NA	0	1	0	0	0	0	0	0	0	0	1	0	1	1	0	0	0	0	0	0	0	0	0	0	0	0	0	0	0	0	0	0	0	0	0	0	0	0	0	0	0	0
274	Schimke免疫骨发育不良	2014	0	未查询到此病	0	0	0	0	0	0	0	0	0	0	0	0	0	0	0	0	0	0	0	0	0	0	0	0	0	0	0	0	0	0	0	0	0	0	0	0	0	0	0	0	0	0	0	0	0
275	热纳综合征	2014	0	未查询到此病	0	0	0	0	0	0	0	0	0	0	0	0	0	0	0	0	0	0	0	0	0	0	0	0	0	0	0	0	0	0	0	0	0	0	0	0	0	0	0	0	0	0	0	0	0
276	假性软骨发育不全	2014	0	未查询到此病	0	0	0	0	0	0	0	0	0	0	0	0	0	0	0	0	0	0	0	0	0	0	0	0	0	0	0	0	0	0	0	0	0	0	0	0	0	0	0	0	0	0	0	0	0
277	非综合征性耳聋	2014	0	未查询到此病	0	0	0	0	0	0	0	0	0	0	0	0	0	0	0	0	0	0	0	0	0	0	0	0	0	0	0	0	0	0	0	0	0	0	0	0	0	0	0	0	0	0	0	0	0
278	家族性皮层肌阵挛震颤伴癫痫	2014	0	未查询到此病	0	0	0	0	0	0	0	0	0	0	0	0	0	0	0	0	0	0	0	0	0	0	0	0	0	0	0	0	0	0	0	0	0	0	0	0	0	0	0	0	0	0	0	0	0
279	肌酸缺乏综合征	2014	0	未查询到此病	0	0	0	0	0	0	0	0	0	0	0	0	0	0	0	0	0	0	0	0	0	0	0	0	0	0	0	0	0	0	0	0	0	0	0	0	0	0	0	0	0	0	0	0	0
280	息肉状脉络膜血管病变	2014	18		12	63.8889	14.0541	0	0	0	2	0	0	8	4	4	0	6	0	18	1	0	0	0	0	0	0	0	0	0	0	0	0	0	7	0	0	9	1	0	0	0	0	0	0	0	0	0	0
281	极早发型炎症性肠病	2014	0	未查询到此病	0	0	0	0	0	0	0	0	0	0	0	0	0	0	0	0	0	0	0	0	0	0	0	0	0	0	0	0	0	0	0	0	0	0	0	0	0	0	0	0	0	0	0	0	0
合计		2014	50555	0	25563	5540.15	2852.18	7796	5784	4589	7813	6120	6401	6010	3644	2027	369	4103	8398	42157	11897	1022	130	0	0	1429	931	1489	3268	1230	1023	0	1070	0	2487	2482	2089	2153	6841	2465	0	995	2519	0	461	0	760	112	941
疾病编码	疾病名称	年份	人次	最终结果核实	男性	Age_mean	Age_sd	0-4	5-14	15-24	25-34	35-44	45-54	55-64	65-74	75-84	85+	医院个数	重返人次	人数=总人次-重返人次	北京	天津	河北	山西	内蒙古	辽宁	吉林	黑龙江	上海	江苏	浙江	安徽	福建	江西	山东	河南	湖北	湖南	广东	广西	海南	重庆	四川	贵州	云南	西藏	陕西	甘肃	青海
1	进行性多灶性白质脑病	2015	11		3	44.4545	21.8923	1	1	1	0	1	1	6	0	0	0	11	0	11	2	0	0	0	0	0	0	0	1	1	0	0	0	0	1	1	0	1	1	0	0	0	1	0	1	0	0	0	0
2	朊蛋白病	2015	67		29	61.2836	8.57375	0	0	0	0	2	12	36	10	7	0	18	15	52	24	2	0	0	0	0	0	3	3	0	0	0	8	0	10	5	0	5	0	0	0	5	0	0	0	0	0	0	0
3	肺毛细血管瘤样增生症	2015	11		6	41.3636	24.3937	1	1	1	1	1	1	3	2	0	0	8	0	11	4	1	0	0	0	0	0	0	0	1	0	0	0	0	0	4	1	0	0	0	0	0	0	0	0	0	0	0	0
4	POEMS综合征	2015	618		369	51.4709	11.6257	0	0	1	43	128	216	145	67	15	3	55	198	420	138	9	2	0	0	11	8	19	60	14	54	0	17	0	22	85	24	21	29	15	0	3	71	0	0	0	12	0	0
5	Castleman病	2015	234		162	43.9402	15.1928	0	4	20	49	32	71	42	9	7	0	27	95	139	130	20	0	0	0	1	0	0	0	4	17	0	12	0	13	0	0	30	0	0	0	0	0	0	7	0	0	0	0
6	木村病	2015	82		67	41.2561	15.3798	1	5	6	9	25	20	13	2	1	0	19	23	59	0	0	0	0	0	1	0	0	2	2	1	0	4	0	1	8	11	1	34	7	0	1	0	0	0	0	0	0	0
7	甲状旁腺癌	2015	107		63	53.7009	12.6246	0	0	1	8	18	25	35	15	5	0	42	16	91	31	1	0	0	0	5	6	2	11	2	12	0	1	0	5	2	5	7	5	0	0	3	2	0	3	0	1	1	1
8	多发性内分泌腺瘤病	2015	156		66	43.9808	13.3293	0	2	10	26	37	50	21	7	3	0	33	18	138	60	0	0	0	0	5	1	0	33	2	4	0	3	0	4	3	1	6	15	0	0	8	2	0	0	0	0	8	0
9	雷特综合征	2015	35		12	19.4	18.8058	7	13	6	2	1	3	2	1	0	0	22	0	35	7	0	0	0	0	1	0	0	1	3	3	0	0	0	0	3	0	0	10	1	0	0	3	0	0	0	1	0	0
10	先天性视网膜劈裂症	2015	1		1	29	NA	0	0	0	1	0	0	0	0	0	0	1	0	1	0	0	0	0	0	0	0	0	0	0	0	0	0	0	0	0	0	0	1	0	0	0	0	0	0	0	0	0	0
11	视网膜血管病变伴有大脑白质脑病	2015	0	未查询到此病	0	0	0	0	0	0	0	0	0	0	0	0	0	0	0	0	0	0	0	0	0	0	0	0	0	0	0	0	0	0	0	0	0	0	0	0	0	0	0	0	0	0	0	0	0
12	视网膜色素变性	2015	966		505	50.9503	16.2861	14	15	34	81	144	242	244	136	47	9	72	133	833	180	16	6	0	0	29	57	25	113	11	54	0	30	0	16	49	34	66	118	19	0	16	61	0	5	0	10	0	6
13	Leber 遗传性视神经病	2015	14		13	19.7143	10.5205	0	6	6	0	1	1	0	0	0	0	3	2	12	0	0	0	0	0	0	0	0	0	0	3	0	1	0	0	0	10	0	0	0	0	0	0	0	0	0	0	0	0
14	慢性进行性眼外肌麻痹	2015	10		4	29.6	21.0987	2	1	1	2	1	2	1	0	0	0	8	0	10	8	0	0	0	0	0	0	0	0	0	0	0	0	0	0	0	0	1	1	0	0	0	0	0	0	0	0	0	0
15	KSS 综合征	2015	7		5	29.1429	28.1746	2	1	0	1	1	1	0	0	1	0	3	0	7	0	0	0	0	0	0	0	0	0	0	0	0	0	0	0	0	0	1	0	0	0	0	5	0	0	0	0	0	0
16	常染色体显性遗传性美尼尔病	2015	0	1402疾病名称无“常染色体显性遗传”表述，仅能查到梅（美）尼尔	0	0	0	0	0	0	0	0	0	0	0	0	0	0	0	0	0	0	0	0	0	0	0	0	0	0	0	0	0	0	0	0	0	0	0	0	0	0	0	0	0	0	0	0	0
17	遗传性肺动脉高压	2015	23		5	36.2609	16.3073	0	1	3	9	4	4	1	0	0	1	3	7	16	22	0	0	0	0	0	0	0	0	0	0	0	0	0	0	0	0	0	0	0	0	0	1	0	0	0	0	0	0
18	特发性肺动脉高压	2015	4875		1934	51.5625	23.949	342	99	230	562	517	607	768	821	748	181	65	281	4594	810	4	4	0	0	153	11	704	404	373	97	0	99	0	212	30	343	60	92	54	0	418	276	0	12	0	102	2	355
19	常染色体显性遗传性脑动脉病伴皮层下梗死和白质脑病	2015	23		7	55.3478	8.87596	0	0	0	1	1	9	9	3	0	0	4	3	20	0	0	0	0	0	0	0	1	0	0	18	0	0	0	0	0	0	2	0	0	0	0	0	0	2	0	0	0	0
20	常染色体隐性遗传性脑动脉病伴皮层下梗死和白质脑病	2015	0	未查询到此病	0	0	0	0	0	0	0	0	0	0	0	0	0	0	0	0	0	0	0	0	0	0	0	0	0	0	0	0	0	0	0	0	0	0	0	0	0	0	0	0	0	0	0	0	0
21	烟雾病	2015	3978		1834	42.3446	15.1473	58	279	145	447	1030	1263	598	142	16	0	72	437	3541	1136	26	18	0	0	82	211	155	463	161	165	0	79	0	218	657	165	115	109	25	0	22	77	0	16	0	45	0	5
22	红斑肢痛症	2015	42		24	47.5	22.291	0	5	4	3	3	8	8	6	5	0	18	1	41	8	0	0	0	0	1	3	0	1	0	1	0	2	0	1	12	5	0	4	1	0	0	2	0	0	0	0	0	0
23	儿童原发性小肠淋巴管扩张症	2015	2	疾病名称无“儿童”仅用限制患者年龄确定	0	8.5	9.19239	1	0	1	0	0	0	0	0	0	0	2	0	2	1	0	0	0	0	0	0	0	1	0	0	0	0	0	0	0	0	0	0	0	0	0	0	0	0	0	0	0	0
24	大动脉转位	2015	1139		757	7.78051	14.3561	794	153	51	52	29	35	16	9	0	0	54	145	994	465	7	2	0	0	5	16	9	262	3	15	0	5	0	25	48	41	22	134	15	0	1	39	0	0	0	4	1	3
25	主动脉缩窄	2015	1385		893	10.6715	16.3918	805	237	117	78	49	49	31	18	1	0	60	220	1165	750	2	0	0	0	0	15	20	196	9	5	0	11	0	20	22	13	65	137	5	0	2	82	0	5	0	5	3	1
26	左心发育不全综合征	2015	51		31	8.7451	17.4572	36	7	0	3	0	3	2	0	0	0	17	4	47	20	2	0	0	0	0	3	0	8	1	0	0	0	0	0	3	2	2	5	1	0	0	3	0	0	0	0	0	0
27	DiGeorge综合征	2015	14		7	4.71429	15.6472	13	0	0	0	0	0	1	0	0	0	7	0	14	2	0	0	0	0	0	0	0	6	0	0	0	0	0	0	2	0	1	1	0	0	1	0	0	1	0	0	0	0
28	致心律失常性右心室心肌病	2015	159		109	41.4088	16.3816	1	7	19	28	31	37	26	8	2	0	17	14	145	104	0	0	0	0	0	1	7	0	22	4	0	0	0	0	0	6	11	0	0	0	0	1	0	3	0	0	0	0
29	特发性心肌病	2015	5		1	52.6	19.9324	0	0	0	2	0	0	1	2	0	0	4	0	5	1	0	1	0	0	0	0	0	2	0	0	0	1	0	0	0	0	0	0	0	0	0	0	0	0	0	0	0	0
30	地中海贫血	2015	8073		1836	29.3722	16.4636	707	695	789	3845	998	406	263	218	100	52	71	1367	6706	206	30	0	0	0	6	3	0	70	13	50	0	172	0	1	6	258	282	4307	1651	0	230	661	0	116	0	2	0	0
31	溶血尿毒综合征	2015	267		165	19.7228	19.9131	57	111	9	20	12	47	3	6	2	0	43	99	168	128	1	0	0	0	18	8	7	21	0	12	0	10	0	10	24	4	4	2	1	0	2	4	0	0	0	0	1	0
32	陈发性睡眠性血红蛋白尿症	2015	708		390	41.8799	16.8	4	17	116	119	136	145	108	40	22	1	64	227	481	68	130	2	0	0	70	45	41	8	6	7	0	6	0	25	94	46	30	38	14	0	13	16	0	4	0	8	3	4
33	范可尼贫血	2015	186		111	24.0591	20.5401	26	67	17	18	15	26	11	6	0	0	39	36	150	66	34	0	0	0	1	0	0	14	1	11	0	3	0	4	20	2	12	5	0	0	1	6	0	1	0	1	0	0
34	先天性纯红细胞再生障碍性贫血	2015	567		306	47.2734	25.3225	64	20	28	57	62	89	73	88	65	21	60	174	393	75	219	1	0	0	16	24	5	42	20	10	0	11	0	14	11	28	26	7	4	0	19	2	0	6	0	8	1	11
35	先天性中性粒细胞减少伴胰腺机能不全综合征	2015	0	未查询到此病	0	0	0	0	0	0	0	0	0	0	0	0	0	0	0	0	0	0	0	0	0	0	0	0	0	0	0	0	0	0	0	0	0	0	0	0	0	0	0	0	0	0	0	0	0
36	先天性中性粒细胞缺乏	2015	7		4	3	3.31662	6	1	0	0	0	0	0	0	0	0	3	0	7	6	0	0	0	0	0	0	0	0	0	0	0	0	0	0	0	0	1	0	0	0	0	0	0	0	0	0	0	0
37	原发性慢性肉芽肿病	2015	51		41	3.33333	3.87126	38	13	0	0	0	0	0	0	0	0	7	5	46	31	0	0	0	0	2	0	0	8	0	0	0	0	0	0	1	0	0	0	0	0	0	2	0	6	0	0	0	0
38	朗格汉斯组织细胞增生症	2015	4355		2799	7.66246	11.4806	2480	1364	157	133	89	62	55	12	3	0	72	2804	1551	2558	8	2	0	0	12	7	4	307	39	86	0	33	0	121	142	284	146	334	67	0	11	60	0	0	0	5	0	1
39	家族性噬血细胞综合征	2015	13		7	25.2308	28.3671	7	0	0	1	0	2	2	1	0	0	7	0	13	10	0	0	0	0	0	0	0	0	0	0	0	0	0	0	0	0	1	1	0	0	0	1	0	0	0	0	0	0
40	X-连锁无丙种球蛋白血症	2015	75		74	10.08	7.46118	20	34	20	0	1	0	0	0	0	0	17	32	43	42	0	0	0	0	0	0	0	8	2	0	0	0	0	1	1	1	2	1	16	0	0	0	0	1	0	0	0	0
41	血管性假性血友病	2015	12		5	29.6667	25.7023	3	2	0	2	0	2	2	1	0	0	10	0	12	3	0	0	0	0	2	0	0	3	0	0	0	0	0	0	0	0	0	1	1	0	0	0	0	0	0	0	0	0
42	生物素酶缺乏症	2015	4		3	1	0.816497	4	0	0	0	0	0	0	0	0	0	3	1	3	0	0	0	0	0	0	0	0	0	0	2	0	0	0	0	0	0	1	0	0	0	0	0	0	0	0	0	0	0
43	(重症) 联合免疫缺陷	2015	24		17	6.25	19.2766	21	1	0	0	0	1	0	0	1	0	8	0	24	1	0	0	0	0	0	0	0	19	0	0	0	0	0	1	0	0	0	3	0	0	0	0	0	0	0	0	0	0
44	湿疹血小板减少伴免疫缺陷综合征	2015	2		2	38	0	0	0	0	0	2	0	0	0	0	0	1	1	1	0	2	0	0	0	0	0	0	0	0	0	0	0	0	0	0	0	0	0	0	0	0	0	0	0	0	0	0	0
45	X-连锁淋巴增生症	2015	5		5	6.8	5.1672	1	4	0	0	0	0	0	0	0	0	5	0	5	2	0	0	0	0	0	0	1	1	0	0	0	0	0	0	0	0	0	0	0	0	0	1	0	0	0	0	0	0
46	高IgE综合征	2015	82		57	25.3415	28.8629	22	27	6	4	2	4	4	2	10	1	21	16	66	25	0	0	0	0	0	0	1	5	1	2	0	7	0	9	0	16	5	4	0	0	4	1	0	2	0	0	0	0
47	遗传性血管性水肿	2015	9		3	48	14.824	0	0	0	2	2	0	4	1	0	0	7	0	9	3	0	0	0	0	0	0	1	1	0	0	0	0	0	0	0	1	1	0	0	0	2	0	0	0	0	0	0	0
48	血栓性血小板减少性紫癜	2015	285		114	43.4526	19.9671	7	10	28	60	43	52	37	25	21	2	59	43	242	49	23	0	0	0	9	7	41	17	0	18	0	18	0	14	11	3	24	7	3	0	11	12	0	6	0	1	3	1
49	先天性无巨核细胞性血小板减少症	2015	45		27	27.9556	26.6969	10	16	0	1	1	9	3	1	3	1	12	12	33	22	0	0	0	0	10	1	0	3	0	1	0	0	0	0	2	2	0	2	1	0	0	0	0	0	0	0	0	1
50	葡萄糖-6-磷酸脱氢酶缺乏症	2015	916		625	15.2762	22.7995	551	77	30	62	44	48	66	30	7	1	5	97	819	0	0	0	0	0	0	0	0	0	0	0	0	4	0	0	0	0	18	0	890	0	0	0	0	4	0	0	0	0
51	GATA1相关性全血细胞减少	2015	0	未查询到此病	0	0	0	0	0	0	0	0	0	0	0	0	0	0	0	0	0	0	0	0	0	0	0	0	0	0	0	0	0	0	0	0	0	0	0	0	0	0	0	0	0	0	0	0	0
52	血小板无力症	2015	7		1	33.7143	15.5426	1	0	0	0	5	1	0	0	0	0	4	0	7	5	0	0	0	0	0	1	0	0	0	1	0	0	0	0	0	0	0	0	0	0	0	0	0	0	0	0	0	0
53	遗传性纤维蛋白原异常血症	2015	52		21	32.2115	19.2724	5	6	6	13	7	8	4	3	0	0	24	2	50	10	5	1	0	0	0	5	0	13	2	1	0	0	0	3	3	2	0	3	1	0	0	1	0	0	0	0	0	0
54	铁粒幼红细胞性贫血	2015	53		31	60.6038	28.0394	3	4	2	0	4	4	4	8	13	11	26	9	44	8	5	0	0	0	3	8	4	1	0	1	0	2	0	0	1	0	2	3	0	0	3	7	0	1	0	0	0	0
55	先天性红细胞生成不良性贫血	2015	24		11	26.1667	20.7295	7	2	1	4	3	6	1	0	0	0	7	5	19	8	11	1	0	0	0	0	0	0	0	0	0	0	0	0	3	0	0	0	0	0	0	0	0	0	0	0	0	0
56	Erdheim-Chester病	2015	9		3	55.7778	13.8814	0	0	0	1	0	5	0	2	1	0	5	2	7	1	0	0	0	0	0	0	0	0	0	0	0	0	0	0	4	0	0	2	0	0	0	1	0	0	0	0	0	1
57	桥本脑病	2015	135		35	47.8963	19.1768	0	8	13	17	14	29	28	19	7	0	35	16	119	45	1	0	0	0	6	0	8	3	2	2	0	9	0	11	5	0	17	17	0	0	2	3	0	0	0	0	0	0
58	先天性高胰岛素性低血糖血症	2015	38		23	0.684211	2.19465	37	1	0	0	0	0	0	0	0	0	2	1	37	38	0	0	0	0	0	0	0	0	0	0	0	0	0	0	0	0	0	0	0	0	0	0	0	0	0	0	0	0
59	肢端肥大症	2015	1118		520	44.28	13.2218	3	11	51	199	304	295	203	32	20	0	69	235	883	393	8	6	0	0	29	6	5	195	16	25	0	84	0	22	17	70	53	85	5	0	3	34	0	7	0	13	4	2
60	卡尔曼综合征	2015	74		66	22.1216	11.0726	0	13	38	17	3	1	1	1	0	0	25	10	64	20	2	1	0	0	2	0	0	1	10	0	0	2	0	5	6	12	1	7	1	0	1	1	0	1	0	0	0	0
61	先天性肾上腺发育不良	2015	2		2	13.5	19.0919	1	0	0	1	0	0	0	0	0	0	2	0	2	1	0	0	0	0	0	0	1	0	0	0	0	0	0	0	0	0	0	0	0	0	0	0	0	0	0	0	0	0
62	先天性肾上腺皮质增生症	2015	588		268	8.69218	11.5664	297	161	63	43	14	4	6	0	0	0	43	56	532	91	6	0	0	0	1	0	6	136	3	19	0	5	0	53	20	2	33	138	23	0	0	2	0	4	0	3	3	0
63	巴特综合征	2015	169		88	24.1243	19.4346	43	22	23	31	20	17	11	2	0	0	48	8	161	52	3	0	0	0	9	2	3	11	3	7	0	3	0	3	6	4	11	14	8	0	0	13	0	3	0	2	4	3
64	Gitelman 综合征	2015	129		71	31.3256	15.758	2	13	37	28	22	13	11	3	0	0	34	6	123	22	2	0	0	0	12	1	0	21	1	17	0	3	0	11	2	1	19	11	0	0	0	0	0	0	0	3	0	0
65	拉伦氏综合征	2015	2		2	20.5	7.77817	0	0	1	1	0	0	0	0	0	0	2	0	2	1	0	0	0	0	0	0	0	0	0	0	0	0	0	1	0	0	0	0	0	0	0	0	0	0	0	0	0	0
66	早老症	2015	8		7	29.125	19.6719	1	1	1	2	1	1	1	0	0	0	7	0	8	2	0	1	0	0	0	0	0	0	0	0	0	0	0	0	3	1	0	1	0	0	0	0	0	0	0	0	0	0
67	全羧化酶合成酶缺乏症	2015	0	未查询到此病	0	0	0	0	0	0	0	0	0	0	0	0	0	0	0	0	0	0	0	0	0	0	0	0	0	0	0	0	0	0	0	0	0	0	0	0	0	0	0	0	0	0	0	0	0
68	四氢生物蝶呤缺乏症	2015	0	未查询到此病	0	0	0	0	0	0	0	0	0	0	0	0	0	0	0	0	0	0	0	0	0	0	0	0	0	0	0	0	0	0	0	0	0	0	0	0	0	0	0	0	0	0	0	0	0
69	苯丙酮尿症	2015	124		76	4.58871	9.8278	94	20	3	5	0	1	0	0	1	0	32	12	112	87	0	0	0	0	2	3	1	5	1	0	0	0	0	2	4	2	1	1	0	0	0	1	0	0	0	3	1	1
70	高苯丙氨酸血症	2015	47		24	1.2766	3.3473	42	5	0	0	0	0	0	0	0	0	5	1	46	45	0	0	0	0	0	0	0	1	0	0	0	0	0	1	0	0	0	0	0	0	0	0	0	0	0	0	0	0
71	酪氨酸血症	2015	6		5	1	2.44949	5	1	0	0	0	0	0	0	0	0	6	0	6	2	0	0	0	0	0	0	0	2	0	0	0	0	0	0	0	0	0	1	1	0	0	0	0	0	0	0	0	0
72	斑驳病	2015	0	未查询到此病	0	0	0	0	0	0	0	0	0	0	0	0	0	0	0	0	0	0	0	0	0	0	0	0	0	0	0	0	0	0	0	0	0	0	0	0	0	0	0	0	0	0	0	0	0
73	Chediak-Higashi综合征	2015	0	未查询到此病	0	0	0	0	0	0	0	0	0	0	0	0	0	0	0	0	0	0	0	0	0	0	0	0	0	0	0	0	0	0	0	0	0	0	0	0	0	0	0	0	0	0	0	0	0
74	白化病	2015	167		84	24.7006	24.8723	61	24	6	18	14	20	11	5	5	3	54	24	143	29	2	2	0	0	3	2	2	14	2	2	0	2	0	50	5	2	13	13	3	0	0	8	0	4	0	3	1	1
75	多种酰基辅酶A脱氢酶缺乏症	2015	2		2	2	0	2	0	0	0	0	0	0	0	0	0	1	0	2	0	0	0	0	0	0	0	0	0	0	0	0	0	0	2	0	0	0	0	0	0	0	0	0	0	0	0	0	0
76	枫糖尿症	2015	24		15	2.29167	4.08049	21	2	1	0	0	0	0	0	0	0	11	4	20	9	0	0	0	0	0	1	0	3	0	1	0	0	0	1	0	6	3	0	0	0	0	0	0	0	0	0	0	0
77	异戊酸血症	2015	1		0	2	NA	1	0	0	0	0	0	0	0	0	0	1	0	1	1	0	0	0	0	0	0	0	0	0	0	0	0	0	0	0	0	0	0	0	0	0	0	0	0	0	0	0	0
78	丙酸血症	2015	29		21	1.96552	3.65946	24	4	1	0	0	0	0	0	0	0	14	1	28	4	0	0	0	0	4	0	0	7	0	0	0	0	0	3	1	0	1	0	0	0	0	4	0	0	0	2	0	0
79	甲基丙二酸血症	2015	233		125	3.25322	6.41592	181	39	6	6	1	0	0	0	0	0	31	40	193	80	5	2	0	0	11	11	1	35	0	2	0	1	0	52	15	4	4	0	0	0	0	3	0	0	0	4	0	0
80	长链3-羟酰基辅酶A脱氢酶缺乏症	2015	0	未查询到此病	0	0	0	0	0	0	0	0	0	0	0	0	0	0	0	0	0	0	0	0	0	0	0	0	0	0	0	0	0	0	0	0	0	0	0	0	0	0	0	0	0	0	0	0	0
81	中链酰基辅酶A脱氢酶缺乏症	2015	0	未查询到此病	0	0	0	0	0	0	0	0	0	0	0	0	0	0	0	0	0	0	0	0	0	0	0	0	0	0	0	0	0	0	0	0	0	0	0	0	0	0	0	0	0	0	0	0	0
82	极长链酰基辅酶A脱氢酶缺乏症	2015	0	未查询到此病	0	0	0	0	0	0	0	0	0	0	0	0	0	0	0	0	0	0	0	0	0	0	0	0	0	0	0	0	0	0	0	0	0	0	0	0	0	0	0	0	0	0	0	0	0
83	肾上腺脑白质营养不良	2015	46		42	18.5435	15.5474	4	23	4	4	7	4	0	0	0	0	23	8	38	11	0	0	0	0	0	2	2	5	0	0	0	2	0	9	3	1	3	4	0	0	0	1	0	0	0	0	0	0
84	原发性肉碱缺乏症	2015	55		31	24.4909	27.338	26	4	2	4	3	3	9	1	2	1	16	6	49	37	0	0	0	0	1	2	0	4	0	0	0	0	0	1	0	0	6	3	0	0	0	0	0	0	0	0	1	0
85	鸟氨酸氨甲酰基转移酶缺乏症	2015	1		1	11	NA	0	1	0	0	0	0	0	0	0	0	1	0	1	0	0	0	0	0	0	0	0	0	0	0	0	1	0	0	0	0	0	0	0	0	0	0	0	0	0	0	0	0
86	N – 乙酰谷氨酸合成酶缺乏症	2015	0	未查询到此病	0	0	0	0	0	0	0	0	0	0	0	0	0	0	0	0	0	0	0	0	0	0	0	0	0	0	0	0	0	0	0	0	0	0	0	0	0	0	0	0	0	0	0	0	0
87	瓜氨酸血症	2015	26		19	5.26923	7.21974	14	10	1	1	0	0	0	0	0	0	12	8	18	10	0	0	0	0	6	0	1	4	0	0	0	0	0	1	0	1	0	3	0	0	0	0	0	0	0	0	0	0
88	戊二酸血症Ⅰ型	2015	1		0	0	NA	1	0	0	0	0	0	0	0	0	0	1	0	1	0	0	0	0	0	0	0	0	0	0	0	0	1	0	0	0	0	0	0	0	0	0	0	0	0	0	0	0	0
89	精氨酸酶缺乏症	2015	13		2	11.3077	22.0658	11	0	0	0	0	0	2	0	0	0	3	9	4	11	2	0	0	0	0	0	0	0	0	0	0	0	0	0	0	0	0	0	0	0	0	0	0	0	0	0	0	0
90	糖原累积病	2015	567		373	16.5344	20.5621	263	96	51	46	34	35	23	13	4	2	43	100	467	89	0	0	0	0	3	1	2	92	1	16	0	14	0	10	3	22	15	265	11	0	3	5	0	4	0	6	0	0
91	遗传性果糖不耐受症	2015	0	未查询到此病	0	0	0	0	0	0	0	0	0	0	0	0	0	0	0	0	0	0	0	0	0	0	0	0	0	0	0	0	0	0	0	0	0	0	0	0	0	0	0	0	0	0	0	0	0
92	半乳糖血症	2015	5		3	1.4	2.60768	4	1	0	0	0	0	0	0	0	0	3	0	5	1	0	0	0	0	0	0	0	0	0	0	0	0	0	1	0	0	3	0	0	0	0	0	0	0	0	0	0	0
93	伴钙化与囊变的脑白质病	2015	1		0	14	NA	0	1	0	0	0	0	0	0	0	0	1	0	1	0	0	0	0	0	0	0	0	0	0	0	0	0	0	0	0	0	1	0	0	0	0	0	0	0	0	0	0	0
94	山德霍夫氏病	2015	1		1	1	NA	1	0	0	0	0	0	0	0	0	0	1	0	1	0	0	0	0	0	0	0	0	0	0	0	0	0	0	0	0	0	1	0	0	0	0	0	0	0	0	0	0	0
95	GM1神经节苷脂贮积症	2015	0	未查询到此病	0	0	0	0	0	0	0	0	0	0	0	0	0	0	0	0	0	0	0	0	0	0	0	0	0	0	0	0	0	0	0	0	0	0	0	0	0	0	0	0	0	0	0	0	0
96	卡纳万型脑白质营养不良	2015	0	未查询到此病	0	0	0	0	0	0	0	0	0	0	0	0	0	0	0	0	0	0	0	0	0	0	0	0	0	0	0	0	0	0	0	0	0	0	0	0	0	0	0	0	0	0	0	0	0
97	亚历山大病	2015	1		1	0	NA	1	0	0	0	0	0	0	0	0	0	1	0	1	0	0	0	0	0	0	0	0	0	0	0	0	0	0	0	0	0	1	0	0	0	0	0	0	0	0	0	0	0
98	巨脑型脑白质营养不良	2015	0	未查询到此病	0	0	0	0	0	0	0	0	0	0	0	0	0	0	0	0	0	0	0	0	0	0	0	0	0	0	0	0	0	0	0	0	0	0	0	0	0	0	0	0	0	0	0	0	0
99	克拉贝病	2015	2		2	55.5	13.435	0	0	0	0	0	1	0	1	0	0	1	0	2	2	0	0	0	0	0	0	0	0	0	0	0	0	0	0	0	0	0	0	0	0	0	0	0	0	0	0	0	0
100	戈谢病	2015	54		34	19.9074	21.9057	20	11	4	4	5	5	3	1	1	0	24	1	53	12	3	0	0	0	2	1	2	3	0	0	0	0	0	1	7	9	5	4	1	0	2	0	0	0	0	0	0	0
101	佩梅病	2015	1		1	0	NA	1	0	0	0	0	0	0	0	0	0	1	0	1	0	0	0	0	0	0	0	0	0	0	0	0	1	0	0	0	0	0	0	0	0	0	0	0	0	0	0	0	0
102	尼曼匹克病	2015	45		30	13.9556	17.7648	23	7	4	4	2	4	1	0	0	0	24	0	45	6	1	1	0	0	2	4	0	1	0	3	0	1	0	6	4	3	7	1	1	0	0	1	0	0	0	1	0	0
103	异染性脑白质营养不良	2015	15		10	13.0667	16.7096	7	3	2	1	1	1	0	0	0	0	10	0	15	7	0	0	0	0	1	0	0	1	0	0	0	2	0	0	1	0	0	1	0	0	1	0	0	0	0	0	0	0
104	法布雷病	2015	35		24	33.3429	13.5211	0	3	9	5	13	3	2	0	0	0	13	5	30	6	0	0	0	0	5	0	1	13	0	0	0	0	0	1	3	3	2	0	0	0	0	0	0	1	0	0	0	0
105	神经元蜡样质脂褐素沉积症	2015	11		9	6.09091	2.91392	4	7	0	0	0	0	0	0	0	0	7	0	11	6	0	0	0	0	1	0	0	0	0	0	0	0	0	0	1	0	2	0	0	0	0	0	0	0	0	0	0	0
106	黏多糖贮积症	2015	116		74	24.7328	27.0624	31	36	7	6	4	5	11	8	8	0	38	3	113	13	0	0	0	0	41	1	1	18	3	3	0	1	0	3	2	7	5	5	0	0	1	3	0	1	0	1	0	1
107	家族性高乳糜微粒血症	2015	0	18个疾病名称无”家族性”	0	0	0	0	0	0	0	0	0	0	0	0	0	0	0	0	0	0	0	0	0	0	0	0	0	0	0	0	0	0	0	0	0	0	0	0	0	0	0	0	0	0	0	0	0
108	线粒体胃肠脑肌病	2015	0	未查询到此病	0	0	0	0	0	0	0	0	0	0	0	0	0	0	0	0	0	0	0	0	0	0	0	0	0	0	0	0	0	0	0	0	0	0	0	0	0	0	0	0	0	0	0	0	0
109	卟啉病	2015	42		14	30.5238	16.3233	0	4	16	10	5	3	1	3	0	0	22	5	37	8	0	6	0	0	3	1	0	2	4	1	0	3	0	2	3	0	2	2	2	0	0	1	0	0	0	0	0	0
110	体质性肝功能不良性黄疸	2015	89		74	37.191	18.3476	2	7	12	20	20	14	6	4	4	0	35	6	83	16	4	1	0	0	2	3	0	0	4	0	0	2	0	3	14	23	4	5	1	0	0	1	0	1	0	4	0	0
111	遗传性低镁血症	2015	1		0	1	NA	1	0	0	0	0	0	0	0	0	0	1	0	1	0	0	0	0	0	0	0	0	0	0	0	0	0	0	0	0	0	1	0	0	0	0	0	0	0	0	0	0	0
112	肝豆状核变性	2015	1567		887	24.8915	14.2047	60	355	433	368	181	113	41	14	2	0	73	266	1301	107	18	4	0	0	32	40	17	214	8	148	0	50	0	53	103	116	165	212	24	0	7	176	0	10	0	20	10	2
113	门克斯病	2015	8		7	11.75	21.4459	6	0	1	0	0	0	1	0	0	0	6	1	7	1	0	0	0	0	0	3	0	0	0	0	0	1	0	0	0	0	1	0	0	0	0	1	0	0	0	1	0	0
114	低碱性磷酸酶血症	2015	4		2	4	1.1547	2	2	0	0	0	0	0	0	0	0	1	1	3	0	0	0	0	0	0	0	0	0	0	0	0	0	0	4	0	0	0	0	0	0	0	0	0	0	0	0	0	0
115	囊性纤维化	2015	48		29	13.1042	16.1854	12	28	2	2	0	1	2	1	0	0	8	10	38	42	0	0	0	0	0	0	0	1	0	0	0	0	0	0	0	0	3	0	0	0	0	1	0	0	0	0	0	0
116	家族性地中海热	2015	17		5	36.4118	28.3197	1	5	2	2	0	1	0	6	0	0	5	2	15	10	0	0	0	0	0	0	1	6	0	0	0	0	0	0	0	0	0	0	0	0	0	0	0	0	0	0	0	0
117	家族性淀粉样周围神经病	2015	12		9	44.0833	15.7853	0	0	0	5	0	3	3	1	0	0	8	2	10	6	0	0	0	0	0	0	0	2	0	0	0	0	0	0	1	0	2	0	0	0	0	0	0	0	0	1	0	0
118	遗传性脑类淀粉血管病	2015	0	未查询到此病	0	0	0	0	0	0	0	0	0	0	0	0	0	0	0	0	0	0	0	0	0	0	0	0	0	0	0	0	0	0	0	0	0	0	0	0	0	0	0	0	0	0	0	0	0
119	原发性轻链型淀粉样变性	2015	0	未查询到此病	0	0	0	0	0	0	0	0	0	0	0	0	0	0	0	0	0	0	0	0	0	0	0	0	0	0	0	0	0	0	0	0	0	0	0	0	0	0	0	0	0	0	0	0	0
120	家族性高胆固醇血症	2015	104		51	42.3077	20.4764	3	12	10	13	13	18	25	5	5	0	27	20	84	56	0	0	0	0	4	0	0	11	0	3	0	0	0	4	0	4	6	8	0	0	3	2	0	0	0	0	2	1
121	假性甲状旁腺功能减低症	2015	105		67	18.8381	14.427	12	46	18	13	9	4	2	1	0	0	43	8	97	15	5	0	0	0	3	1	8	12	1	3	0	4	0	8	4	4	5	5	3	0	3	2	0	1	0	3	1	2
122	遗传性低血磷性佝偻病	2015	0	47个疾病名称无“遗传性”	0	0	0	0	0	0	0	0	0	0	0	0	0	0	0	0	0	0	0	0	0	0	0	0	0	0	0	0	0	0	0	0	0	0	0	0	0	0	0	0	0	0	0	0	0
123	ACTH非依赖性大结节样肾上腺增生	2015	0	未查询到此病	0	0	0	0	0	0	0	0	0	0	0	0	0	0	0	0	0	0	0	0	0	0	0	0	0	0	0	0	0	0	0	0	0	0	0	0	0	0	0	0	0	0	0	0	0
124	原发性色素性结节样肾上腺病	2015	15		4	49.8	12.8797	0	0	0	1	3	6	3	2	0	0	10	1	14	0	0	0	0	0	0	0	0	2	0	0	0	1	0	0	3	0	0	0	0	0	1	1	0	1	0	5	0	1
125	甲状腺激素抵抗综合征	2015	38		17	25.8158	22.0109	10	2	8	7	3	3	4	0	0	1	16	0	38	1	1	0	0	0	0	0	0	6	2	2	0	0	0	9	8	0	4	2	0	0	0	1	0	0	0	1	0	0
126	低促性腺激素性性腺功能减退症	2015	480		369	24.8021	12.2927	3	65	219	111	42	26	10	1	3	0	37	37	443	2	8	0	0	0	10	0	5	81	31	23	0	6	0	53	63	17	13	76	16	0	6	13	0	3	0	11	0	0
127	果糖-1，6-二磷酸酶缺乏症	2015	0	16个疾病名称无完全匹配仅有“果糖代谢紊乱”	0	0	0	0	0	0	0	0	0	0	0	0	0	0	0	0	0	0	0	0	0	0	0	0	0	0	0	0	0	0	0	0	0	0	0	0	0	0	0	0	0	0	0	0	0
128	丙酮酸脱氢酶E1-a缺乏症	2015	0	14个疾病名称无完全匹配仅有“丙酮酸脱羧酶缺乏”	0	0	0	0	0	0	0	0	0	0	0	0	0	0	0	0	0	0	0	0	0	0	0	0	0	0	0	0	0	0	0	0	0	0	0	0	0	0	0	0	0	0	0	0	0
129	a1－抗胰蛋白酶缺乏症	2015	10		5	31.5	23.3678	2	1	1	1	1	2	2	0	0	0	4	0	10	9	0	0	0	0	1	0	0	0	0	0	0	0	0	0	0	0	0	0	0	0	0	0	0	0	0	0	0	0
130	亨廷顿舞蹈症	2015	65		25	50.8462	13.7047	0	1	2	5	13	16	20	6	1	1	30	1	64	14	0	0	0	0	3	1	0	6	0	10	0	0	0	0	2	2	5	2	1	0	1	10	0	3	0	0	0	2
131	脊髓小脑性共济失调	2015	124		51	43.7419	16.1718	1	5	13	12	23	35	27	6	1	1	29	4	120	48	5	0	0	0	0	0	3	2	0	34	0	4	0	2	1	2	14	3	1	0	1	0	0	1	0	0	0	2
132	遗传性共济失调	2015	175		102	44.9371	17.4945	4	6	13	25	29	41	42	10	0	5	44	6	169	7	1	0	0	0	8	0	6	20	0	20	0	12	0	7	6	5	21	18	4	0	7	11	0	6	0	4	0	1
133	弗里德赖希共济失调	2015	4		2	15	22.286	2	1	0	0	0	1	0	0	0	0	2	0	4	0	0	0	0	0	0	0	0	0	0	0	0	0	0	0	1	0	0	0	0	0	0	0	0	0	0	0	0	0
134	毛细血管扩张共济失调症	2015	4		2	37.75	34.7599	0	2	0	0	0	1	0	0	1	0	4	0	4	2	0	0	0	0	0	0	0	1	0	0	0	0	0	0	0	0	0	0	0	0	0	0	0	1	0	0	0	0
135	遗传性痉挛性截瘫	2015	154		90	36.2468	16.2884	1	10	29	31	36	26	12	7	2	0	46	6	148	39	0	0	0	0	8	4	0	6	2	13	0	3	0	9	9	9	4	11	2	0	3	19	0	2	0	2	0	2
136	运动神经元病	2015	2027		1347	56.744	12.7656	6	4	26	65	213	503	652	433	121	4	69	219	1808	417	28	22	0	0	109	57	64	118	35	113	0	70	0	114	184	148	119	119	20	0	44	89	0	40	0	37	1	13
137	脊延髓肌萎缩症	2015	59		56	50.0847	10.559	0	0	1	5	9	25	15	3	1	0	30	1	58	33	0	0	0	0	0	1	0	6	0	1	0	3	0	4	2	1	2	1	1	0	1	1	0	0	0	1	0	0
138	脊髓性肌萎缩症	2015	190		131	25.6105	27.2586	82	13	13	15	7	17	22	13	7	1	54	16	174	30	1	0	0	0	10	4	2	14	2	10	0	10	0	5	12	5	12	23	6	0	2	10	0	7	0	9	0	0
139	帕金森病（青年型、早发性）	2015	166	年龄小于40	100	33.7939	6.55232	0	3	14	47	101	0	0	0	0	0	43	10	156	51	0	0	0	0	3	1	2	18	2	10	0	2	0	4	11	9	8	12	3	0	3	12	0	6	0	4	0	1
140	苍白球脑桥黑质变性	2015	20		12	42.7	27.1256	0	5	2	2	0	1	5	2	3	0	11	3	17	3	0	0	0	0	1	0	0	0	2	0	0	0	0	0	0	0	10	1	0	0	0	2	0	1	0	0	0	0
141	遗传性肌张力不全	2015	13		8	37.3077	25.921	1	3	1	0	3	3	0	0	2	0	11	0	13	0	0	0	0	0	0	0	0	0	0	0	0	1	0	2	2	3	0	3	0	0	0	0	0	0	0	0	0	0
142	额颞叶痴呆	2015	91		58	71.3187	13.3599	0	0	0	0	1	10	25	13	18	24	29	24	67	10	1	0	0	0	6	0	3	6	0	1	0	5	0	33	4	3	3	8	0	0	2	2	0	2	0	1	0	1
143	亚急性坏死性脑脊髓病	2015	74		61	53.5811	20.052	4	0	2	6	7	16	15	14	10	0	9	12	62	2	0	0	0	0	0	23	0	0	39	0	0	0	0	6	1	1	1	0	0	0	0	0	0	0	0	1	0	0
144	路易体痴呆	2015	189		128	75.8413	9.8189	0	0	0	0	0	5	19	54	76	35	40	35	154	32	3	0	0	0	9	0	5	5	1	21	0	6	0	22	12	6	12	33	2	0	8	6	0	0	0	3	0	1
145	高血钾型周期性瘫痪	2015	3		2	37.6667	5.1316	0	0	0	1	2	0	0	0	0	0	3	0	3	1	0	0	0	0	0	0	0	0	0	0	0	0	0	0	1	0	0	0	0	0	0	0	0	1	0	0	0	0
146	肌阵挛性癫痫伴破碎红纤维（MERRF）	2015	1		0	3	NA	1	0	0	0	0	0	0	0	0	0	1	0	1	0	0	0	0	0	0	0	0	0	0	0	0	0	0	0	0	0	1	0	0	0	0	0	0	0	0	0	0	0
147	常染色体显性遗传性癫痫伴听觉特征	2015	0	未查询到此病	0	0	0	0	0	0	0	0	0	0	0	0	0	0	0	0	0	0	0	0	0	0	0	0	0	0	0	0	0	0	0	0	0	0	0	0	0	0	0	0	0	0	0	0	0
148	常染色体显性遗传性夜发性额叶癫痫	2015	5		2	18.4	16.8167	1	2	1	0	0	1	0	0	0	0	5	0	5	2	0	0	0	0	0	0	0	0	0	0	0	0	0	0	0	0	0	2	0	0	0	0	0	0	0	1	0	0
149	良性家族性新生儿婴儿惊厥	2015	14		5	0.571429	0.646206	14	0	0	0	0	0	0	0	0	0	6	0	14	0	0	0	0	0	0	0	2	2	0	0	0	0	0	3	1	0	5	0	1	0	0	0	0	0	0	0	0	0
150	青少年肌阵挛癫痫	2015	37		20	16.6486	12.4994	0	24	7	4	0	1	0	1	0	0	15	3	34	18	0	0	0	0	1	0	0	2	0	1	0	1	0	0	2	0	0	6	1	0	0	1	0	0	0	0	0	1
151	Lennox-Gastaut 综合征	2015	75		45	8.28	6.29792	22	44	6	3	0	0	0	0	0	0	13	17	58	47	0	0	0	0	0	6	0	3	0	0	0	0	0	0	1	0	7	4	0	0	0	1	0	1	0	0	0	0
152	婴儿严重肌阵挛性癫痫	2015	73		43	3.41096	2.82762	62	11	0	0	0	0	0	0	0	0	18	9	64	16	0	0	0	0	0	0	0	5	0	3	0	1	0	4	6	0	32	2	3	0	0	0	0	0	0	1	0	0
153	维生素B6依赖性癫痫	2015	0	未查询到此病	0	0	0	0	0	0	0	0	0	0	0	0	0	0	0	0	0	0	0	0	0	0	0	0	0	0	0	0	0	0	0	0	0	0	0	0	0	0	0	0	0	0	0	0	0
154	早发家族性偏瘫型偏头痛	2015	1		1	33	NA	0	0	0	1	0	0	0	0	0	0	1	0	1	0	0	0	0	0	1	0	0	0	0	0	0	0	0	0	0	0	0	0	0	0	0	0	0	0	0	0	0	0
155	发作性睡病	2015	432		277	21.2917	18.2921	11	238	55	39	27	21	23	15	3	0	45	12	420	107	0	3	0	0	7	4	4	36	3	37	0	0	0	37	120	15	18	10	0	0	0	8	0	6	0	12	0	1
156	遗传性感觉神经病	2015	4		3	19.25	21.8994	0	3	0	0	0	1	0	0	0	0	3	0	4	3	0	0	0	0	0	0	0	0	0	0	0	0	0	0	0	0	1	0	0	0	0	0	0	0	0	0	0	0
157	遗传性运动神经病	2015	15		10	42	19.9105	1	0	2	2	3	0	7	0	0	0	8	1	14	8	0	1	0	0	0	0	0	0	0	0	0	1	0	1	1	2	0	1	0	0	0	0	0	0	0	0	0	0
158	遗传性自主神经病	2015	1		1	0	NA	1	0	0	0	0	0	0	0	0	0	1	0	1	1	0	0	0	0	0	0	0	0	0	0	0	0	0	0	0	0	0	0	0	0	0	0	0	0	0	0	0	0
159	腓骨肌萎缩症	2015	147		82	35.1429	16.7912	0	19	29	31	19	26	16	7	0	0	47	5	142	45	1	1	0	0	4	1	3	9	1	9	0	4	0	10	10	3	8	14	0	0	5	6	0	4	0	3	1	0
160	巨轴索神经病	2015	2		0	43	0	0	0	0	0	2	0	0	0	0	0	1	1	1	0	0	0	0	0	0	0	0	0	0	0	0	0	0	0	0	2	0	0	0	0	0	0	0	0	0	0	0	0
161	多灶性运动神经病	2015	78		50	51.4487	13.1866	0	0	3	3	16	23	22	9	1	1	25	12	66	21	1	0	0	0	1	0	0	9	0	6	0	4	0	2	6	0	9	6	1	0	3	0	0	1	0	1	0	3
162	慢性炎性脱髓鞘性多发神经病	2015	935		604	49.1262	18.3885	15	35	78	71	109	203	234	135	50	5	67	177	758	183	12	18	0	0	18	13	19	149	10	52	0	27	0	39	18	36	106	66	9	0	6	111	0	19	0	12	0	3
163	先天性肌无力综合征	2015	8		6	24.5	32.0223	3	2	0	0	1	0	1	0	1	0	5	0	8	7	0	0	0	0	0	0	0	0	0	0	0	0	0	0	0	0	1	0	0	0	0	0	0	0	0	0	0	0
164	线粒体脑肌病伴高乳酸血症和脑卒中样发作（MELAS）	2015	89		57	24.8315	15.4009	3	21	31	12	6	13	3	0	0	0	15	8	81	49	0	0	0	0	1	3	0	0	0	3	0	3	0	0	0	1	5	0	0	0	0	23	0	1	0	0	0	0
165	肢带型肌营养不良1型	2015	0	未查询到此病	0	0	0	0	0	0	0	0	0	0	0	0	0	0	0	0	0	0	0	0	0	0	0	0	0	0	0	0	0	0	0	0	0	0	0	0	0	0	0	0	0	0	0	0	0
166	肢带型肌营养不良2型	2015	0	未查询到此病	0	0	0	0	0	0	0	0	0	0	0	0	0	0	0	0	0	0	0	0	0	0	0	0	0	0	0	0	0	0	0	0	0	0	0	0	0	0	0	0	0	0	0	0	0
167	抗肌萎缩蛋白病	2015	505		421	18.3386	19.1896	146	157	55	30	44	42	23	6	2	0	64	46	459	51	17	2	0	0	21	7	10	30	3	28	0	12	0	21	58	17	32	42	38	0	11	38	0	11	0	15	1	1
168	远端性肌病	2015	9		7	30.4444	10.0637	0	1	1	4	2	1	0	0	0	0	6	0	9	6	0	0	0	0	0	0	0	0	0	1	0	0	0	0	0	0	0	0	0	0	0	2	0	0	0	0	0	0
169	中央核肌病	2015	0	未查询到此病	0	0	0	0	0	0	0	0	0	0	0	0	0	0	0	0	0	0	0	0	0	0	0	0	0	0	0	0	0	0	0	0	0	0	0	0	0	0	0	0	0	0	0	0	0
170	中央轴空病	2015	0	未查询到此病	0	0	0	0	0	0	0	0	0	0	0	0	0	0	0	0	0	0	0	0	0	0	0	0	0	0	0	0	0	0	0	0	0	0	0	0	0	0	0	0	0	0	0	0	0
171	性连锁肌管肌病	2015	0	未查询到此病	0	0	0	0	0	0	0	0	0	0	0	0	0	0	0	0	0	0	0	0	0	0	0	0	0	0	0	0	0	0	0	0	0	0	0	0	0	0	0	0	0	0	0	0	0
172	软骨萎缩性肌强直	2015	0	未查询到此病	0	0	0	0	0	0	0	0	0	0	0	0	0	0	0	0	0	0	0	0	0	0	0	0	0	0	0	0	0	0	0	0	0	0	0	0	0	0	0	0	0	0	0	0	0
173	埃梅里－德赖弗斯肌营养不良	2015	3		3	25	19.0526	0	2	0	0	0	1	0	0	0	0	3	0	3	3	0	0	0	0	0	0	0	0	0	0	0	0	0	0	0	0	0	0	0	0	0	0	0	0	0	0	0	0
174	眼咽型肌营养不良	2015	8		7	55.25	14.1295	0	0	0	1	1	0	4	2	0	0	6	0	8	5	0	0	0	0	0	0	0	1	0	1	0	0	0	1	0	0	0	0	0	0	0	0	0	0	0	0	0	0
175	面肩肱型肌营养不良	2015	27		23	35	13.188	0	1	7	3	9	6	1	0	0	0	14	1	26	10	0	0	0	0	1	1	1	1	0	3	0	1	0	2	0	0	2	4	0	0	1	0	0	0	0	0	0	0
176	肌强直性肌营养不良	2015	64		41	36.7812	12.1909	0	3	9	12	21	15	4	0	0	0	32	0	64	25	0	0	0	0	4	3	0	2	1	4	0	3	0	2	0	3	3	2	0	0	1	9	0	1	0	0	1	0
177	先天性肌强直	2015	7		3	36	27.9523	1	1	1	1	0	0	2	1	0	0	6	0	7	1	0	0	0	0	0	0	0	0	0	0	0	0	0	0	1	0	2	0	0	0	1	1	0	0	0	0	0	0
178	先天性肌营养不良	2015	9		4	9.22222	9.0385	5	2	1	1	0	0	0	0	0	0	4	0	9	5	0	0	0	0	0	1	0	0	0	0	0	0	0	0	0	0	3	0	0	0	0	0	0	0	0	0	0	0
179	杆状体肌病	2015	5		5	40.2	23.7108	0	1	1	0	0	2	0	1	0	0	2	1	4	5	0	0	0	0	0	0	0	0	0	0	0	0	0	0	0	0	0	0	0	0	0	0	0	0	0	0	0	0
180	先天性肌型比例失调	2015	0	未查询到此病	0	0	0	0	0	0	0	0	0	0	0	0	0	0	0	0	0	0	0	0	0	0	0	0	0	0	0	0	0	0	0	0	0	0	0	0	0	0	0	0	0	0	0	0	0
181	周期性瘫痪	2015	328		274	34.1616	13.5464	2	14	53	117	83	31	17	9	2	0	65	24	304	45	7	4	0	0	7	15	21	13	9	21	0	2	0	7	84	20	11	6	5	0	3	5	0	0	0	20	5	2
182	低血钾型周期性瘫痪	2015	1081		928	36.605	14.1201	2	23	178	349	258	151	78	27	7	8	69	53	1028	80	27	8	0	0	37	8	124	56	20	24	0	23	0	48	100	76	100	32	16	0	57	74	0	32	0	45	5	42
183	包涵体肌炎	2015	35		24	42.9143	23.9022	6	0	1	4	3	9	6	5	1	0	16	0	35	11	3	0	0	0	2	0	0	1	0	0	0	2	0	0	8	0	0	4	0	0	2	1	0	0	0	1	0	0
184	遗传性包涵体肌病	2015	6		5	17.3333	19.2527	3	0	0	2	1	0	0	0	0	0	3	0	6	2	0	0	0	0	0	0	0	0	0	0	0	1	0	0	3	0	0	0	0	0	0	0	0	0	0	0	0	0
185	Lambert-Eaton综合征	2015	199		120	53.6583	20.0576	12	4	4	8	9	41	68	33	19	1	46	20	179	69	3	4	0	0	1	7	7	17	0	3	0	7	0	35	11	4	8	4	2	0	2	2	0	0	0	6	0	0
186	特发性肺纤维化	2015	2294		1579	68.9608	13.1283	0	5	4	27	57	191	517	644	619	230	67	262	2032	313	5	3	0	0	115	18	17	63	99	14	0	18	0	133	198	13	90	54	16	0	36	287	0	7	0	92	2	601
187	进行性家族性肝内胆汁淤积症	2015	4		0	2.5	2.51661	3	1	0	0	0	0	0	0	0	0	3	1	3	1	2	0	0	0	0	0	0	0	0	1	0	0	0	0	0	0	0	0	0	0	0	0	0	0	0	0	0	0
188	皮肤松弛症	2015	764		107	49.3364	14.9258	1	1	36	83	165	210	162	54	44	8	46	58	706	590	8	0	0	0	4	14	4	56	2	18	0	5	0	6	2	25	2	12	0	0	2	1	0	6	0	1	0	0
189	先天性厚甲	2015	0	未查询到此病	0	0	0	0	0	0	0	0	0	0	0	0	0	0	0	0	0	0	0	0	0	0	0	0	0	0	0	0	0	0	0	0	0	0	0	0	0	0	0	0	0	0	0	0	0
190	遗传性色素性皮肤病	2015	34		21	59.2647	14.4123	0	0	0	3	1	7	11	7	5	0	16	0	34	1	0	0	0	0	1	0	3	1	0	1	0	0	0	1	1	2	4	1	0	0	1	0	0	0	0	1	0	1
191	毛囊闭锁三联症	2015	20		18	30.25	13.5292	0	0	7	7	3	1	2	0	0	0	10	4	16	5	0	0	0	0	0	2	0	0	0	0	0	0	0	0	1	1	2	8	0	0	0	0	0	0	0	0	0	0
192	结节性多动脉炎	2015	193		134	48.2487	17.6275	0	8	15	22	26	44	42	27	9	0	46	59	134	55	3	2	0	0	8	2	1	11	4	35	0	1	0	1	15	1	5	23	4	0	0	4	0	1	0	8	0	0
193	系统性硬化病	2015	1730		335	51.2353	14.2287	1	32	48	129	273	520	413	248	62	4	64	371	1359	444	80	17	0	0	117	62	81	69	3	148	0	65	0	42	14	73	214	11	23	0	0	67	0	73	0	4	19	3
194	免疫性坏死性肌肉病	2015	81		40	41.1481	17.5279	1	4	9	19	12	12	18	4	2	0	18	14	67	35	2	0	0	0	0	1	1	2	0	1	0	0	0	1	1	10	2	1	0	0	0	24	0	0	0	0	0	0
195	进行性骨化性肌炎	2015	8		6	22.625	18.1811	1	2	2	1	1	0	1	0	0	0	7	0	8	2	0	0	0	0	1	1	1	1	1	0	0	0	0	0	0	0	0	0	0	0	0	1	0	0	0	0	0	0
196	骨膜增生厚皮症	2015	20		19	23.1	9.15883	1	1	10	7	0	1	0	0	0	0	9	3	17	8	0	0	0	0	0	0	0	2	1	0	0	0	0	0	5	0	2	0	2	0	0	0	0	0	0	0	0	0
197	变形综合征	2015	2		2	27	25.4558	0	1	0	0	0	1	0	0	0	0	2	0	2	1	1	0	0	0	0	0	0	0	0	0	0	0	0	0	0	0	0	0	0	0	0	0	0	0	0	0	0	0
198	淋巴管肌瘤病	2015	19		1	41.1053	11.105	0	0	1	5	6	5	2	0	0	0	9	1	18	0	0	0	0	0	1	3	1	1	0	1	0	0	0	0	0	1	9	0	0	0	0	0	0	2	0	0	0	0
199	多巴反应性肌张力不全	2015	48		24	25	18.6958	10	6	8	10	6	5	3	0	0	0	23	2	46	18	0	0	0	0	2	0	0	4	0	2	0	1	0	3	2	1	6	3	2	0	0	0	0	0	0	0	0	0
200	先天性脊柱侧凸	2015	592		244	19.1419	19.1314	117	245	80	43	19	42	21	16	8	1	57	45	547	193	0	5	0	0	7	7	3	11	118	5	0	5	0	62	11	15	25	31	31	0	4	23	0	0	0	4	4	3
201	常染色体隐性遗传激素抵抗肾病综合征	2015	0	45589个名称不完全匹配仅有“肾病综合征”	0	0	0	0	0	0	0	0	0	0	0	0	0	0	0	0	0	0	0	0	0	0	0	0	0	0	0	0	0	0	0	0	0	0	0	0	0	0	0	0	0	0	0	0	0
202	常染色体显性遗传激素抵抗肾病综合征	2015	0	45589个名称不完全匹配仅有“肾病综合征”	0	0	0	0	0	0	0	0	0	0	0	0	0	0	0	0	0	0	0	0	0	0	0	0	0	0	0	0	0	0	0	0	0	0	0	0	0	0	0	0	0	0	0	0	0
203	先天性肾性尿崩症	2015	0	未查询到此病	0	0	0	0	0	0	0	0	0	0	0	0	0	0	0	0	0	0	0	0	0	0	0	0	0	0	0	0	0	0	0	0	0	0	0	0	0	0	0	0	0	0	0	0	0
204	Lowe综合征	2015	9		9	2.77778	2.68225	7	2	0	0	0	0	0	0	0	0	8	0	9	4	0	0	0	0	2	1	0	1	0	0	0	0	0	0	0	0	1	0	0	0	0	0	0	0	0	0	0	0
205	多发性大动脉炎	2015	855		155	34.4655	17.0583	23	90	140	202	157	120	78	33	12	0	66	177	678	225	17	0	0	0	28	13	52	97	24	22	0	28	0	51	60	35	10	35	1	0	7	40	0	4	0	72	1	5
206	遗传性囊性肾病	2015	0	未查询到此病	0	0	0	0	0	0	0	0	0	0	0	0	0	0	0	0	0	0	0	0	0	0	0	0	0	0	0	0	0	0	0	0	0	0	0	0	0	0	0	0	0	0	0	0	0
207	特发性结节样肾小球硬化	2015	0	未查询到此病	0	0	0	0	0	0	0	0	0	0	0	0	0	0	0	0	0	0	0	0	0	0	0	0	0	0	0	0	0	0	0	0	0	0	0	0	0	0	0	0	0	0	0	0	0
208	永久性新生儿糖尿病	2015	0	未查询到此病	0	0	0	0	0	0	0	0	0	0	0	0	0	0	0	0	0	0	0	0	0	0	0	0	0	0	0	0	0	0	0	0	0	0	0	0	0	0	0	0	0	0	0	0	0
209	Joubert 综合征	2015	3		0	15.3333	14.0475	1	1	0	1	0	0	0	0	0	0	3	0	3	0	0	0	0	0	0	0	0	0	0	0	0	1	0	0	0	0	0	0	1	0	0	0	0	0	0	0	0	0
210	无虹膜症	2015	61		47	20.3443	19.1458	20	11	5	6	10	8	1	0	0	0	14	5	56	33	0	0	0	0	0	1	1	2	1	0	0	0	0	1	0	4	2	13	0	0	0	2	0	1	0	0	0	0
211	Alagille 综合征	2015	607		334	52.4596	20.6832	40	17	12	24	42	130	169	120	48	5	58	111	496	295	6	3	0	0	0	3	10	41	9	8	0	2	0	12	6	17	83	11	1	0	0	2	0	6	0	46	11	33
212	常染色体隐性遗传多囊肾病	2015	7		3	42	24.4813	1	0	0	2	0	1	1	2	0	0	5	0	7	2	0	0	0	0	2	0	0	3	0	0	0	0	0	0	0	0	0	0	0	0	0	0	0	0	0	0	0	0
213	轴前肢端骨发育不全	2015	0	未查询到此病	0	0	0	0	0	0	0	0	0	0	0	0	0	0	0	0	0	0	0	0	0	0	0	0	0	0	0	0	0	0	0	0	0	0	0	0	0	0	0	0	0	0	0	0	0
214	软骨发育不良	2015	176		122	7.61932	13.7897	107	39	14	5	5	2	1	2	1	0	32	14	162	46	0	0	0	0	1	1	1	13	8	0	0	4	0	1	6	1	75	1	2	0	5	1	0	0	0	3	0	0
215	软骨发育不全	2015	69		35	7.17391	12.1534	40	20	5	0	2	0	2	0	0	0	24	5	64	21	0	0	0	0	0	1	0	4	0	6	0	5	0	5	9	2	2	6	0	0	0	0	0	0	0	0	0	0
216	成骨不全症	2015	231		131	13.1169	14.8233	52	121	32	10	5	1	4	1	5	0	35	33	198	22	4	0	0	0	13	4	0	17	1	1	0	3	0	101	7	10	7	2	0	0	6	9	0	1	0	3	0	0
217	McCune-Albright 综合征	2015	73		23	16.3562	12.9028	7	36	11	12	5	1	0	1	0	0	27	8	65	27	0	0	0	0	3	2	0	17	0	3	0	1	0	2	1	1	4	5	0	0	1	1	0	0	0	0	0	0
218	多发性骨骺发育不良	2015	38		28	14.7368	12.2798	5	22	4	2	4	1	0	0	0	0	13	2	36	23	0	0	0	0	0	1	0	4	0	0	0	0	0	1	0	1	2	2	2	0	0	1	0	0	0	0	0	0
219	X-连锁鱼鳞病	2015	2		2	54	29.6985	0	0	0	1	0	0	0	0	1	0	2	0	2	1	0	0	0	0	0	0	0	0	0	0	0	0	0	0	0	0	0	0	0	0	0	1	0	0	0	0	0	0
220	遗传性大疱性表皮松解症	2015	1																	1
221	掌跖角化症	2015	18		11	42.5	24.7915	1	2	2	2	1	3	2	3	2	0	12	1	17	3	0	0	0	0	0	0	0	0	0	1	0	0	0	2	1	0	3	3	2	0	0	2	0	0	0	0	0	0
222	着色性干皮病	2015	27		21	25.9259	16.8795	4	5	4	2	11	1	0	0	0	0	12	9	18	12	0	0	0	0	0	0	1	1	0	0	0	0	0	1	1	0	4	0	0	0	0	1	0	0	0	0	0	0
223	色素失禁症	2015	58		13	10.0862	18.3354	37	11	2	0	2	2	3	0	1	0	30	5	53	12	2	0	0	0	2	2	0	8	0	5	0	0	0	4	6	0	0	5	1	0	0	3	0	1	0	1	0	0
224	外胚层发育不良	2015	49		30	3.81633	6.21716	36	8	5	0	0	0	0	0	0	0	20	1	48	14	0	0	0	0	2	0	0	6	0	5	0	0	0	5	6	1	3	1	4	0	0	0	0	0	0	0	0	0
225	先天性角化不良	2015	17		10	41.5294	28.165	1	5	1	0	0	2	2	5	1	0	12	2	15	11	1	0	0	0	0	0	0	0	0	0	0	0	0	0	0	0	4	0	0	0	0	1	0	0	0	0	0	0
226	神经纤维瘤	2015	1141		596	32.3146	20.0889	66	195	221	191	128	157	107	45	28	3	79	123	1018	255	48	8	0	0	21	20	12	100	28	58	0	121	0	68	12	22	170	76	16	0	12	48	0	28	0	6	0	1
227	结节性硬化症	2015	421		208	17.2803	15.974	133	76	65	97	22	14	10	2	2	0	60	44	377	90	1	4	0	0	8	39	2	58	3	21	0	11	0	51	38	9	23	24	6	0	0	9	0	4	0	8	1	0
228	黑斑息肉综合征	2015	98		50	27.1531	16.3552	2	27	16	23	20	5	1	2	2	0	16	14	84	43	0	0	0	0	0	0	0	17	0	0	0	0	0	13	0	0	12	0	11	0	0	0	0	1	0	0	0	0
229	林岛综合征	2015	25		10	39.8	10.7005	0	0	2	5	10	5	3	0	0	0	14	3	22	1	1	0	0	0	1	0	0	4	2	0	0	2	0	7	0	1	1	2	1	0	0	1	0	0	0	0	0	0
230	Goldenhar综合征	2015	63		39	5.5873	7.53622	39	13	10	1	0	0	0	0	0	0	10	8	55	44	0	0	0	0	4	4	0	0	0	0	0	0	0	0	0	5	0	0	0	0	0	3	0	1	0	2	0	0
231	歌舞伎面谱综合征	2015	3		0	8	4.58258	1	2	0	0	0	0	0	0	0	0	2	0	3	3	0	0	0	0	0	0	0	0	0	0	0	0	0	0	0	0	0	0	0	0	0	0	0	0	0	0	0	0
232	Fraser综合征	2015	24		18	7.5	11.7251	15	5	1	2	0	1	0	0	0	0	7	1	23	0	0	0	0	0	0	0	0	1	0	0	0	0	0	12	2	0	0	8	0	0	1	0	0	0	0	0	0	0
233	Silver-Russell 综合征	2015	7		3	3.28571	2.05866	5	2	0	0	0	0	0	0	0	0	3	0	7	5	0	0	0	0	0	0	0	0	0	0	0	0	0	1	0	0	0	1	0	0	0	0	0	0	0	0	0	0
234	德朗热综合征	2015	0	未查询到此病	0	0	0	0	0	0	0	0	0	0	0	0	0	0	0	0	0	0	0	0	0	0	0	0	0	0	0	0	0	0	0	0	0	0	0	0	0	0	0	0	0	0	0	0	0
235	柯凯因综合征	2015	4		3	7.75	3.5	0	4	0	0	0	0	0	0	0	0	2	2	2	4	0	0	0	0	0	0	0	0	0	0	0	0	0	0	0	0	0	0	0	0	0	0	0	0	0	0	0	0
236	Noonan综合征	2015	10		9	14.7	8.9697	2	3	4	1	0	0	0	0	0	0	7	1	9	6	0	0	0	0	0	0	0	0	0	0	0	1	0	0	1	0	2	0	0	0	0	0	0	0	0	0	0	0
237	指甲髌骨综合症	2015	6		2	9.5	14.5705	4	1	0	0	1	0	0	0	0	0	4	1	5	2	0	0	0	0	0	0	0	0	0	0	0	0	0	1	0	0	2	1	0	0	0	0	0	0	0	0	0	0
238	Rubinstein-Taybi 综合征	2015	0	未查询到此病	0	0	0	0	0	0	0	0	0	0	0	0	0	0	0	0	0	0	0	0	0	0	0	0	0	0	0	0	0	0	0	0	0	0	0	0	0	0	0	0	0	0	0	0	0
239	马凡综合征	2015	931		558	29.8217	15.5772	19	156	190	232	159	107	56	11	0	1	68	103	828	246	4	4	0	0	31	16	19	126	31	35	0	22	0	40	46	23	72	116	17	0	9	38	0	13	0	7	0	2
240	威廉姆斯综合征	2015	20		11	5.5	4.51314	9	9	2	0	0	0	0	0	0	0	4	3	17	19	0	0	0	0	0	0	0	0	0	0	0	1	0	0	0	0	0	0	0	0	0	0	0	0	0	0	0	0
241	Alport 综合征	2015	148		102	14.223	13.1402	22	80	22	17	4	0	0	1	1	1	28	17	131	46	0	0	0	0	0	3	1	16	5	11	0	0	0	0	2	13	14	21	2	0	0	6	0	6	0	1	0	0
242	Prader-Willi 综合征	2015	52		37	7.32692	9.50278	26	18	4	3	0	1	0	0	0	0	12	5	47	15	0	0	0	0	0	9	0	0	0	0	0	0	0	12	2	0	4	8	0	0	1	1	0	0	0	0	0	0
243	原发性纤毛运动障碍	2015	93		44	15.914	18.3117	25	41	6	8	4	4	2	1	2	0	19	17	76	50	0	0	0	0	1	0	0	7	4	0	0	1	0	6	0	2	8	5	7	0	0	1	0	0	0	0	0	0
244	猫叫综合征	2015	11		4	8.09091	23.8933	9	1	0	0	0	0	0	0	1	0	6	1	10	0	0	0	0	0	2	0	0	2	0	0	0	0	0	0	0	0	1	0	0	0	0	3	0	0	0	3	0	0
245	Angelman 综合征	2015	30		21	2.13333	2.04658	27	3	0	0	0	0	0	0	0	0	13	5	25	7	0	0	0	0	3	8	0	2	0	2	0	0	0	2	0	2	0	2	1	0	0	1	0	0	0	0	0	0
246	特纳综合征	2015	156		0	17.5705	11.3899	12	64	44	20	12	2	2	0	0	0	45	12	144	24	0	0	0	0	8	0	2	26	4	8	0	4	0	8	15	2	8	12	7	0	1	5	0	2	0	0	4	0
247	克氏综合症	2015	94		86	26.9043	13.6862	5	1	35	41	5	4	0	1	2	0	32	11	83	46	2	2	0	0	3	0	0	2	3	5	0	1	0	1	1	3	4	9	0	0	1	3	0	1	0	1	1	0
248	脆性X染色体综合征	2015	3		3	27.6667	25.5799	0	1	1	0	0	0	1	0	0	0	3	0	3	1	0	0	0	0	0	0	0	0	0	0	0	0	0	0	0	0	1	0	0	0	1	0	0	0	0	0	0	0
249	巴德尔－别德尔综合征	2015	19		1	40.5789	12.2125	0	0	1	8	3	1	6	0	0	0	5	4	15	10	0	3	0	0	0	0	0	0	0	2	0	0	0	0	0	4	0	0	0	0	0	0	0	0	0	0	0	0
250	特发性肺含铁血黄素沉着症	2015	39		10	6.20513	5.91688	20	17	1	1	0	0	0	0	0	0	4	7	32	37	0	0	0	0	0	0	0	0	0	0	0	0	0	0	0	0	0	0	0	0	0	0	0	1	0	0	1	0
251	先天性中枢性低通气综合征	2015	0	14个疾病名称不完全匹配，无“先天性”	0	0	0	0	0	0	0	0	0	0	0	0	0	0	0	0	0	0	0	0	0	0	0	0	0	0	0	0	0	0	0	0	0	0	0	0	0	0	0	0	0	0	0	0	0
252	遗传性支气管扩张	2015	0	未查询到此病	0	0	0	0	0	0	0	0	0	0	0	0	0	0	0	0	0	0	0	0	0	0	0	0	0	0	0	0	0	0	0	0	0	0	0	0	0	0	0	0	0	0	0	0	0
253	IgG4相关性疾病	2015	570		358	57.2544	14.5019	0	3	13	27	52	120	179	106	66	4	48	134	436	172	34	0	0	0	27	0	9	79	42	15	0	24	0	12	17	7	13	60	8	0	2	22	0	0	0	0	0	0
254	Treacher Collins 综合征	2015	33		18	22.303	22.1578	11	2	8	4	3	1	1	3	0	0	11	4	29	14	0	0	0	0	0	0	0	6	0	0	0	0	0	0	0	2	1	4	0	0	0	0	0	0	0	6	0	0
255	石骨症	2015	146		96	10.4384	19.147	102	17	2	2	7	6	8	2	0	0	23	91	55	112	0	0	0	0	2	0	1	5	2	0	0	1	0	0	1	2	7	6	0	0	0	3	0	0	0	0	0	1
256	肺静脉闭塞病	2015	30		19	52	19.1671	1	1	3	0	3	2	15	5	0	0	9	13	17	17	0	0	0	0	7	1	0	0	0	0	0	0	0	0	0	0	1	3	0	0	0	0	0	0	0	0	0	0
257	消化道神经内分泌肿瘤	2015	0	未查询到此病	0	0	0	0	0	0	0	0	0	0	0	0	0	0	0	0	0	0	0	0	0	0	0	0	0	0	0	0	0	0	0	0	0	0	0	0	0	0	0	0	0	0	0	0	0
258	胰腺囊性肿瘤	2015	0	未查询到此病	0	0	0	0	0	0	0	0	0	0	0	0	0	0	0	0	0	0	0	0	0	0	0	0	0	0	0	0	0	0	0	0	0	0	0	0	0	0	0	0	0	0	0	0	0
259	X-连锁高IgM血症	2015	2		2	6	0	0	2	0	0	0	0	0	0	0	0	1	1	1	0	0	0	0	0	0	0	0	0	0	0	0	0	0	0	0	0	2	0	0	0	0	0	0	0	0	0	0	0
260	丙酮酸激酶缺乏症	2015	1		1	46	NA	0	0	0	0	0	1	0	0	0	0	1	0	1	0	1	0	0	0	0	0	0	0	0	0	0	0	0	0	0	0	0	0	0	0	0	0	0	0	0	0	0	0
261	白质消融性白质脑炎	2015	0	未查询到此病	0	0	0	0	0	0	0	0	0	0	0	0	0	0	0	0	0	0	0	0	0	0	0	0	0	0	0	0	0	0	0	0	0	0	0	0	0	0	0	0	0	0	0	0	0
262	遗传性弥漫性白质脑病伴轴索球样变	2015	0	未查询到此病	0	0	0	0	0	0	0	0	0	0	0	0	0	0	0	0	0	0	0	0	0	0	0	0	0	0	0	0	0	0	0	0	0	0	0	0	0	0	0	0	0	0	0	0	0
263	β – 酮硫解酶缺乏症	2015	0	未查询到此病	0	0	0	0	0	0	0	0	0	0	0	0	0	0	0	0	0	0	0	0	0	0	0	0	0	0	0	0	0	0	0	0	0	0	0	0	0	0	0	0	0	0	0	0	0
264	溶酶体酸性脂肪酶缺乏症	2015	0	未查询到此病	0	0	0	0	0	0	0	0	0	0	0	0	0	0	0	0	0	0	0	0	0	0	0	0	0	0	0	0	0	0	0	0	0	0	0	0	0	0	0	0	0	0	0	0	0
265	谷固醇血症	2015	0	未查询到此病	0	0	0	0	0	0	0	0	0	0	0	0	0	0	0	0	0	0	0	0	0	0	0	0	0	0	0	0	0	0	0	0	0	0	0	0	0	0	0	0	0	0	0	0	0
266	神经轴索营养不良	2015	0	未查询到此病	0	0	0	0	0	0	0	0	0	0	0	0	0	0	0	0	0	0	0	0	0	0	0	0	0	0	0	0	0	0	0	0	0	0	0	0	0	0	0	0	0	0	0	0	0
267	家族性发作性运动诱发性运动障碍	2015	0	未查询到此病	0	0	0	0	0	0	0	0	0	0	0	0	0	0	0	0	0	0	0	0	0	0	0	0	0	0	0	0	0	0	0	0	0	0	0	0	0	0	0	0	0	0	0	0	0
268	Ⅵ型胶原蛋白相关肌病	2015	0	未查询到此病	0	0	0	0	0	0	0	0	0	0	0	0	0	0	0	0	0	0	0	0	0	0	0	0	0	0	0	0	0	0	0	0	0	0	0	0	0	0	0	0	0	0	0	0	0
269	肌原纤维肌病	2015	0	未查询到此病	0	0	0	0	0	0	0	0	0	0	0	0	0	0	0	0	0	0	0	0	0	0	0	0	0	0	0	0	0	0	0	0	0	0	0	0	0	0	0	0	0	0	0	0	0
270	结蛋白病	2015	0	未查询到此病	0	0	0	0	0	0	0	0	0	0	0	0	0	0	0	0	0	0	0	0	0	0	0	0	0	0	0	0	0	0	0	0	0	0	0	0	0	0	0	0	0	0	0	0	0
271	先天性胆汁酸合成障碍	2015	0	未查询到此病	0	0	0	0	0	0	0	0	0	0	0	0	0	0	0	0	0	0	0	0	0	0	0	0	0	0	0	0	0	0	0	0	0	0	0	0	0	0	0	0	0	0	0	0	0
272	自身免疫性小肠炎	2015	0	未查询到此病	0	0	0	0	0	0	0	0	0	0	0	0	0	0	0	0	0	0	0	0	0	0	0	0	0	0	0	0	0	0	0	0	0	0	0	0	0	0	0	0	0	0	0	0	0
273	Blau综合征	2015	39		20	7.35897	7.71017	16	20	0	3	0	0	0	0	0	0	4	22	17	35	0	0	0	0	0	0	0	0	0	0	0	3	0	0	0	0	0	1	0	0	0	0	0	0	0	0	0	0
274	Schimke免疫骨发育不良	2015	0	未查询到此病	0	0	0	0	0	0	0	0	0	0	0	0	0	0	0	0	0	0	0	0	0	0	0	0	0	0	0	0	0	0	0	0	0	0	0	0	0	0	0	0	0	0	0	0	0
275	热纳综合征	2015	0	未查询到此病	0	0	0	0	0	0	0	0	0	0	0	0	0	0	0	0	0	0	0	0	0	0	0	0	0	0	0	0	0	0	0	0	0	0	0	0	0	0	0	0	0	0	0	0	0
276	假性软骨发育不全	2015	0	未查询到此病	0	0	0	0	0	0	0	0	0	0	0	0	0	0	0	0	0	0	0	0	0	0	0	0	0	0	0	0	0	0	0	0	0	0	0	0	0	0	0	0	0	0	0	0	0
277	非综合征性耳聋	2015	0	未查询到此病	0	0	0	0	0	0	0	0	0	0	0	0	0	0	0	0	0	0	0	0	0	0	0	0	0	0	0	0	0	0	0	0	0	0	0	0	0	0	0	0	0	0	0	0	0
278	家族性皮层肌阵挛震颤伴癫痫	2015	0	未查询到此病	0	0	0	0	0	0	0	0	0	0	0	0	0	0	0	0	0	0	0	0	0	0	0	0	0	0	0	0	0	0	0	0	0	0	0	0	0	0	0	0	0	0	0	0	0
279	肌酸缺乏综合征	2015	0	未查询到此病	0	0	0	0	0	0	0	0	0	0	0	0	0	0	0	0	0	0	0	0	0	0	0	0	0	0	0	0	0	0	0	0	0	0	0	0	0	0	0	0	0	0	0	0	0
280	息肉状脉络膜血管病变	2015	23		14	65	10.3221	0	0	0	0	1	2	8	5	7	0	4	5	18	0	0	0	0	0	0	0	0	0	0	0	0	2	0	10	0	0	11	0	0	0	0	0	0	0	0	0	0	0
281	极早发型炎症性肠病	2015	0	未查询到此病	0	0	0	0	0	0	0	0	0	0	0	0	0	0	0	0	0	0	0	0	0	0	0	0	0	0	0	0	0	0	0	0	0	0	0	0	0	0	0	0	0	0	0	0	0
	合计	2015	56191	0	28289	5672.31	3044.66	8962	6484	4663	8969	6526	7245	6289	3989	2428	634	4526	10029	46162	13871	961	178	0	0	1329	925	1616	4444	1310	1795	0	1279	0	2236	2732	2306	2868	7326	3176	0	1063	2738	0	548	0	740	108	1130
2014+2015
疾病编码	疾病名称	年份	人次	最终结果核实	男性	Age_mean	Age_sd	0-4	5-14	15-24	25-34	35-44	45-54	55-64	65-74	75-84	85+	医院个数	重返人次	人数=总人次-重返人次	北京	天津	河北	山西	内蒙古	辽宁	吉林	黑龙江	上海	江苏	浙江	安徽	福建	江西	山东	河南	湖北	湖南	广东	广西	海南	重庆	四川	贵州	云南	西藏	陕西	甘肃	青海
1	进行性多灶性白质脑病		21		8			3	1	5	2	1	3	6	1	1	0				2	0	0	0	0	0	1	3	1	1	0	0	0	0	1	1	1	1	2	0	0	2	1	0	3	0	0	0	0
2	朊蛋白病		99		42			29	0	0	0	3	18	52	18	8	0				26	2	0	0	0	0	0	5	4	3	0	0	10	0	18	8	1	10	2	0	0	5	0	0	1	0	1	0	1
3	肺毛细血管瘤样增生症		21		12			6	1	1	2	4	3	7	2	0	0				7	3	0	0	0	1	0	0	1	1	1	0	0	0	0	4	1	1	1	0	0	0	0	0	0	0	0	0	0
4	POEMS综合征		1213		709			369	1	6	91	270	369	304	143	26	3				336	13	3	0	0	19	14	26	92	26	91	0	32	0	42	157	48	45	54	23	0	6	165	0	0	0	14	0	0
5	Castleman病		301		215			162	5	24	52	49	84	58	16	13	0				156	23	1	0	0	4	0	0	0	13	19	0	18	0	13	0	0	38	0	0	0	0	0	0	16	0	0	0	0
6	木村病		179		153			67	20	17	16	49	41	30	4	1	0				2	0	0	0	0	3	0	0	5	4	2	0	10	0	3	20	25	1	75	8	0	1	1	0	0	0	1	0	0
7	甲状旁腺癌		200		113			63	0	4	20	39	46	60	24	7	0				56	3	0	0	0	7	10	7	28	4	13	0	5	0	11	5	10	10	7	2	0	4	4	0	4	0	5	3	1
8	多发性内分泌腺瘤病		276		111			66	7	14	55	59	85	37	14	5	0				114	0	0	0	0	11	1	1	60	4	14	0	6	0	4	4	1	8	16	0	0	11	9	0	0	0	0	11	0
9	雷特综合征		80		40			25	38	10	2	1	6	2	1	0	0				13	0	0	0	0	1	1	0	2	5	3	0	1	0	0	5	0	1	36	1	0	0	6	0	0	0	1	0	0
10	先天性视网膜劈裂症		2		2			1	1	0	1	0	0	0	0	0	0				0	0	0	0	0	0	0	0	0	0	0	0	1	0	0	0	0	0	1	0	0	0	0	0	0	0	0	0	0
11	视网膜血管病变伴有大脑白质脑病		0		0			0	0	0	0	0	0	0	0	0	0				0	0	0	0	0	0	0	0	0	0	0	0	0	0	0	0	0	0	0	0	0	0	0	0	0	0	0	0	0
12	视网膜色素变性		1852		956			515	30	54	170	298	453	484	245	85	9				358	24	10	0	0	52	113	40	173	27	99	0	68	0	37	96	73	125	236	29	0	32	103	0	14	0	27	4	19
13	Leber 遗传性视神经病		19		17			13	9	7	1	1	1	0	0	0	0				0	0	0	0	0	0	2	0	0	0	3	0	1	0	0	0	13	0	0	0	0	0	0	0	0	0	0	0	0
14	慢性进行性眼外肌麻痹		10		4			4	1	1	2	1	2	1	0	0	0				8	0	0	0	0	0	0	0	0	0	0	0	0	0	0	0	0	1	1	0	0	0	0	0	0	0	0	0	0
15	KSS 综合征		14		9			5	5	0	1	1	2	2	0	1	0				3	0	0	0	0	0	0	0	0	0	0	0	0	0	0	0	0	1	2	0	0	0	7	0	0	0	0	0	0
16	常染色体显性遗传性美尼尔病		0		0			0	0	0	0	0	0	0	0	0	0				0	0	0	0	0	0	0	0	0	0	0	0	0	0	0	0	0	0	0	0	0	0	0	0	0	0	0	0	0
17	遗传性肺动脉高压		40		10			5	2	3	16	10	6	2	0	0	1				38	0	0	0	0	0	0	0	0	0	0	0	0	0	0	0	0	0	0	0	0	0	2	0	0	0	0	0	0
18	特发性肺动脉高压		9536		3771			2429	209	505	1180	1022	1216	1514	1476	1276	301				1596	4	8	0	0	248	18	1348	734	667	133	0	119	0	650	83	701	106	183	136	0	800	468	0	18	0	305	6	789
19	常染色体显性遗传性脑动脉病伴皮层下梗死和白质脑病		57		23			7	0	1	2	8	25	17	4	0	0				22	0	0	0	0	0	0	1	0	0	24	0	0	0	0	0	2	3	0	0	0	0	3	0	2	0	0	0	0
20	常染色体隐性遗传性脑动脉病伴皮层下梗死和白质脑病		0		0			0	0	0	0	0	0	0	0	0	0				0	0	0	0	0	0	0	0	0	0	0	0	0	0	0	0	0	0	0	0	0	0	0	0	0	0	0	0	0
21	烟雾病		7419		3476			1898	516	319	912	1946	2251	1076	244	33	0				2092	55	29	0	0	145	400	301	891	324	291	0	175	0	380	1173	344	182	199	48	0	47	145	0	46	0	88	0	7
22	红斑肢痛症		89		51			24	12	5	6	8	15	21	12	10	0				13	0	0	0	0	3	3	0	1	0	3	0	4	0	6	21	11	3	4	1	0	2	4	0	1	0	2	0	0
23	儿童原发性小肠淋巴管扩张症		4		0			0	2	1	0	0	0	0	0	0	0				1	0	0	0	0	0	0	0	1	0	0	0	2	0	0	0	0	0	0	0	0	0	0	0	0	0	0	0	0
24	大动脉转位		2221		1464			1545	278	110	96	57	52	29	15	2	0				866	14	4	0	0	11	25	33	503	7	19	0	14	0	61	88	83	53	301	26	0	1	65	0	0	0	7	2	4
25	主动脉缩窄		2654		1758			1649	492	198	143	96	84	56	19	5	0				1503	4	0	0	0	3	31	32	361	28	7	0	21	0	43	40	38	90	259	13	0	4	133	0	7	0	7	6	1
26	左心发育不全综合征		116		62			86	16	1	3	0	3	2	0	0	0				49	4	0	0	0	0	5	0	14	4	1	0	0	0	2	5	4	8	13	1	0	0	5	0	0	0	0	0	0
27	DiGeorge综合征		27		14			17	2	1	0	0	0	1	0	0	0				4	0	0	0	0	0	0	0	8	0	0	0	0	0	2	3	0	3	5	0	0	1	0	0	1	0	0	0	0
28	致心律失常性右心室心肌病		329		232			113	16	37	49	67	81	49	20	5	0				218	0	1	0	0	3	7	13	0	40	14	0	0	0	0	0	12	13	0	0	0	0	1	0	6	0	0	1	0
29	特发性心肌病		15		4			3	0	0	4	3	0	2	3	1	0				5	0	1	0	0	1	0	1	2	0	0	0	1	0	3	0	0	0	0	0	0	0	1	0	0	0	0	0	0
30	地中海贫血		14855		3597			2607	1288	1525	6833	1803	717	556	391	187	77				398	52	0	0	0	12	10	1	138	17	69	0	337	0	1	14	437	435	7872	3106	0	429	1317	0	185	0	6	2	2
31	溶血尿毒综合征		532		318			211	226	18	60	28	78	6	10	3	0				237	15	0	0	0	26	19	10	31	1	12	0	10	0	47	54	13	8	17	2	0	3	8	0	0	0	0	1	0
32	陈发性睡眠性血红蛋白尿症		1337		742			391	26	222	241	271	275	182	73	41	1				112	267	7	0	0	103	123	92	25	14	15	0	7	0	43	128	90	58	85	26	0	16	31	0	5	0	10	8	6
33	范可尼贫血		350		205			137	130	26	32	33	39	24	13	1	0				97	103	0	0	0	2	0	0	18	1	15	0	4	0	7	29	5	22	18	3	0	5	12	0	1	0	3	0	0
34	先天性纯红细胞再生障碍性贫血		1113		560			355	37	50	99	132	175	177	171	117	42				128	401	1	0	0	29	49	12	75	45	12	0	20	0	40	15	94	43	24	8	0	32	5	0	9	0	17	2	21
35	先天性中性粒细胞减少伴胰腺机能不全综合征		0		0			0	0	0	0	0	0	0	0	0	0				0	0	0	0	0	0	0	0	0	0	0	0	0	0	0	0	0	0	0	0	0	0	0	0	0	0	0	0	0
36	先天性中性粒细胞缺乏		8		5			4	2	0	0	0	0	0	0	0	0				6	0	0	0	0	0	0	0	0	0	0	0	0	0	0	0	0	2	0	0	0	0	0	0	0	0	0	0	0
37	原发性慢性肉芽肿病		103		84			81	25	0	0	0	0	0	0	0	0				74	0	0	0	0	4	0	0	9	0	0	0	0	0	0	1	5	0	0	0	0	0	2	0	7	0	0	0	0
38	朗格汉斯组织细胞增生症		7657		4913			4726	2404	281	209	139	116	81	16	4	0				4638	14	2	0	0	27	8	7	470	65	95	0	46	0	176	284	419	240	648	155	0	29	125	0	2	0	9	0	1
39	家族性噬血细胞综合征		38		20			14	2	3	1	5	4	6	1	2	0				35	0	0	0	0	0	0	0	0	0	0	0	0	0	0	0	0	1	1	0	0	0	1	0	0	0	0	0	0
40	X-连锁无丙种球蛋白血症		109		107			81	58	21	0	1	0	0	1	1	0				44	0	0	0	0	0	0	0	14	2	0	0	0	0	2	2	1	5	2	33	0	0	2	0	1	0	0	0	0
41	血管性假性血友病		26		8			5	9	2	2	1	5	2	2	0	0				6	0	0	0	0	3	0	0	3	0	2	0	0	0	0	2	2	0	1	1	0	0	1	0	0	0	0	0	0
42	生物素酶缺乏症		7		6			4	1	0	0	0	0	0	1	0	0				0	0	0	0	0	0	0	0	1	0	2	0	0	0	0	0	0	2	1	0	0	0	0	0	0	0	0	0	0
43	(重症) 联合免疫缺陷		31		23			23	1	0	0	0	1	1	0	1	0				1	0	0	0	0	0	0	0	24	0	0	0	0	0	1	0	0	0	4	0	0	0	1	0	0	0	0	0	0
44	湿疹血小板减少伴免疫缺陷综合征		5		5			5	0	0	0	2	0	0	0	0	0				0	2	0	0	0	0	1	0	0	0	0	0	0	0	0	0	0	2	0	0	0	0	0	0	0	0	0	0	0
45	X-连锁淋巴增生症		12		6			6	6	0	0	1	0	3	0	0	0				4	0	0	0	0	1	1	2	1	0	0	0	0	0	0	0	0	0	0	0	0	1	1	0	1	0	0	0	0
46	高IgE综合征		146		109			72	49	10	8	8	5	12	5	11	1				49	0	0	0	0	1	0	1	8	1	2	0	23	0	10	2	18	8	9	0	0	7	4	0	3	0	0	0	0
47	遗传性血管性水肿		15		8			3	1	1	3	2	2	5	1	0	0				5	0	0	0	0	0	0	1	1	0	0	0	0	0	0	0	3	1	0	0	0	2	1	0	0	0	1	0	0
48	血栓性血小板减少性紫癜		688		276			118	95	75	123	104	118	80	51	29	2				86	65	0	0	0	25	19	72	32	6	35	0	29	0	106	30	15	54	15	7	0	24	28	0	16	0	6	3	3
49	先天性无巨核细胞性血小板减少症		82		43			30	25	0	9	1	15	7	6	4	2				30	0	0	0	0	10	4	0	6	0	2	0	0	0	3	2	3	0	2	1	0	0	0	0	0	0	0	0	3
50	葡萄糖-6-磷酸脱氢酶缺乏症		1306		883			884	89	39	84	61	67	91	51	12	2				0	4	0	0	0	0	0	0	0	0	0	0	7	0	0	0	0	22	1	1268	0	0	0	0	4	0	0	0	0
51	GATA1相关性全血细胞减少		0		0			0	0	0	0	0	0	0	0	0	0				0	0	0	0	0	0	0	0	0	0	0	0	0	0	0	0	0	0	0	0	0	0	0	0	0	0	0	0	0
52	血小板无力症		13		3			2	4	1	0	5	1	0	0	0	0				6	4	0	0	0	0	2	0	0	0	1	0	0	0	0	0	0	0	0	0	0	0	0	0	0	0	0	0	0
53	遗传性纤维蛋白原异常血症		177		94			43	40	25	23	19	23	13	5	2	0				71	35	1	0	0	1	5	2	21	2	3	0	0	0	4	6	3	3	11	2	0	3	1	0	0	0	0	0	0
54	铁粒幼红细胞性贫血		105		64			35	4	4	2	10	9	12	18	27	12				13	12	0	0	0	5	14	6	1	0	1	0	4	0	1	5	1	4	6	2	0	4	14	0	1	0	0	0	0
55	先天性红细胞生成不良性贫血		36		19			13	4	1	4	8	8	1	1	0	0				10	17	1	0	0	0	0	0	0	0	0	0	0	0	0	5	1	0	0	0	0	0	0	0	0	0	0	0	0
56	Erdheim-Chester病		18		7			3	0	0	1	1	8	3	4	1	0				3	0	0	0	0	2	0	0	0	0	0	0	0	0	0	4	0	0	4	0	0	1	1	0	0	0	0	1	1
57	桥本脑病		256		66			35	9	22	30	28	52	72	31	12	0				46	2	0	0	0	18	0	30	8	4	2	0	14	0	43	19	1	27	24	4	0	2	5	0	0	0	1	0	1
58	先天性高胰岛素性低血糖血症		40		25			25	1	0	0	0	0	0	0	0	0				38	0	0	0	0	0	0	0	0	0	0	0	0	0	0	0	0	2	0	0	0	0	0	0	0	0	0	0	0
59	肢端肥大症		1988		937			521	16	90	357	499	517	391	67	47	0				704	24	12	0	0	55	15	22	313	28	51	0	157	0	51	28	103	74	139	12	0	10	63	0	14	0	29	13	3
60	卡尔曼综合征		152		138			66	27	87	28	6	1	1	1	1	0				42	4	2	0	0	3	0	1	4	22	1	0	3	0	9	16	20	1	13	3	0	1	2	0	2	0	0	1	0
61	先天性肾上腺发育不良		7		4			4	1	1	1	0	0	0	1	0	0				4	0	0	0	0	1	0	1	0	0	0	0	0	0	0	0	0	0	0	0	0	0	0	0	1	0	0	0	0
62	先天性肾上腺皮质增生症		1063		491			503	305	118	71	25	5	6	1	0	0				101	11	0	0	0	5	0	10	192	8	26	0	6	0	110	41	5	71	325	38	0	2	2	0	6	0	8	3	2
63	巴特综合征		353		190			121	48	59	66	42	35	24	3	0	0				100	6	0	0	0	17	3	6	17	4	11	0	6	0	15	27	7	29	35	19	0	0	24	0	5	0	4	5	3
64	Gitelman 综合征		266		138			74	26	69	64	45	34	16	7	0	0				43	5	0	0	0	15	1	1	50	12	37	0	5	0	13	7	5	32	22	1	0	2	2	0	0	0	6	0	0
65	拉伦氏综合征		7		3			2	2	4	1	0	0	0	0	0	0				1	1	0	0	0	0	0	0	0	0	0	0	0	0	3	0	0	1	1	0	0	0	0	0	0	0	0	0	0
66	早老症		23		16			10	5	2	3	6	2	1	0	0	0				9	0	1	0	0	0	0	0	0	0	0	0	0	0	0	3	2	1	6	0	0	0	1	0	0	0	0	0	0
67	全羧化酶合成酶缺乏症		0		0			0	0	0	0	0	0	0	0	0	0				0	0	0	0	0	0	0	0	0	0	0	0	0	0	0	0	0	0	0	0	0	0	0	0	0	0	0	0	0
68	四氢生物蝶呤缺乏症		0		0			0	0	0	0	0	0	0	0	0	0				0	0	0	0	0	0	0	0	0	0	0	0	0	0	0	0	0	0	0	0	0	0	0	0	0	0	0	0	0
69	苯丙酮尿症		246		147			170	38	7	8	0	3	0	1	1	0				176	4	3	0	0	2	3	2	6	2	0	0	0	0	3	7	4	2	4	0	0	0	1	0	1	0	11	4	1
70	高苯丙氨酸血症		126		60			93	10	2	1	0	1	0	1	0	0				118	0	0	0	0	0	0	0	2	0	0	0	0	0	2	0	0	0	0	0	0	0	2	0	0	0	0	0	1
71	酪氨酸血症		14		10			10	3	0	0	0	0	0	0	1	0				3	0	0	0	0	0	0	0	5	0	0	0	0	0	0	0	1	2	1	1	0	0	0	0	0	0	0	0	1
72	斑驳病		0		0			0	0	0	0	0	0	0	0	0	0				0	0	0	0	0	0	0	0	0	0	0	0	0	0	0	0	0	0	0	0	0	0	0	0	0	0	0	0	0
73	Chediak-Higashi综合征		0		0			0	0	0	0	0	0	0	0	0	0				0	0	0	0	0	0	0	0	0	0	0	0	0	0	0	0	0	0	0	0	0	0	0	0	0	0	0	0	0
74	白化病		333		175			151	41	17	39	29	29	20	14	12	4				56	7	3	0	0	8	3	3	22	4	9	0	4	0	106	16	6	28	15	3	0	2	18	0	5	0	3	1	2
75	多种酰基辅酶A脱氢酶缺乏症		2		2			2	0	0	0	0	0	0	0	0	0				0	0	0	0	0	0	0	0	0	0	0	0	0	0	2	0	0	0	0	0	0	0	0	0	0	0	0	0	0
76	枫糖尿症		40		26			19	3	1	2	0	4	2	2	1	0				14	4	0	0	0	0	1	0	6	0	1	0	0	0	1	0	7	3	0	0	0	0	0	0	2	0	0	0	0
77	异戊酸血症		1		0			0	0	0	0	0	0	0	0	0	0				1	0	0	0	0	0	0	0	0	0	0	0	0	0	0	0	0	0	0	0	0	0	0	0	0	0	0	0	0
78	丙酸血症		58		39			48	6	1	0	0	0	0	0	0	0				15	0	0	0	0	5	0	0	8	0	0	0	0	0	9	5	0	1	0	0	0	0	4	0	0	0	6	1	0
79	甲基丙二酸血症		470		257			296	92	12	10	2	2	0	0	0	0				196	5	4	0	0	22	16	1	55	0	2	0	1	0	84	40	12	4	4	0	0	0	3	0	0	0	18	0	0
80	长链3-羟酰基辅酶A脱氢酶缺乏症		0		0			0	0	0	0	0	0	0	0	0	0				0	0	0	0	0	0	0	0	0	0	0	0	0	0	0	0	0	0	0	0	0	0	0	0	0	0	0	0	0
81	中链酰基辅酶A脱氢酶缺乏症		0		0			0	0	0	0	0	0	0	0	0	0				0	0	0	0	0	0	0	0	0	0	0	0	0	0	0	0	0	0	0	0	0	0	0	0	0	0	0	0	0
82	极长链酰基辅酶A脱氢酶缺乏症		0		0			0	0	0	0	0	0	0	0	0	0				0	0	0	0	0	0	0	0	0	0	0	0	0	0	0	0	0	0	0	0	0	0	0	0	0	0	0	0	0
83	肾上腺脑白质营养不良		93		84			46	47	10	10	10	8	0	0	0	0				22	0	0	0	0	0	3	3	12	0	0	0	4	0	14	3	3	8	8	1	0	1	2	0	1	0	0	1	0
84	原发性肉碱缺乏症		86		56			42	17	7	4	4	3	10	1	2	1				56	0	0	0	0	1	2	0	7	0	0	0	1	0	1	0	0	8	6	0	0	0	0	0	0	0	2	1	0
85	鸟氨酸氨甲酰基转移酶缺乏症		1		1			1	1	0	0	0	0	0	0	0	0				0	0	0	0	0	0	0	0	0	0	0	0	1	0	0	0	0	0	0	0	0	0	0	0	0	0	0	0	0
86	N – 乙酰谷氨酸合成酶缺乏症		0		0			0	0	0	0	0	0	0	0	0	0				0	0	0	0	0	0	0	0	0	0	0	0	0	0	0	0	0	0	0	0	0	0	0	0	0	0	0	0	0
87	瓜氨酸血症		55		42			30	14	1	2	12	1	0	0	0	0				15	0	0	0	0	10	0	1	9	0	0	0	0	0	2	1	1	1	3	0	0	0	1	0	0	0	11	0	0
88	戊二酸血症Ⅰ型		1		0			0	0	0	0	0	0	0	0	0	0				0	0	0	0	0	0	0	0	0	0	0	0	1	0	0	0	0	0	0	0	0	0	0	0	0	0	0	0	0
89	精氨酸酶缺乏症		14		3			2	0	1	0	0	0	2	0	0	0				12	2	0	0	0	0	0	0	0	0	0	0	0	0	0	0	0	0	0	0	0	0	0	0	0	0	0	0	0
90	糖原累积病		1178		772			624	167	89	117	90	81	63	34	17	6				175	0	0	0	0	5	1	2	142	1	19	0	30	0	25	3	45	45	619	26	0	5	5	0	5	0	11	1	0
91	遗传性果糖不耐受症		1		0			0	1	0	0	0	0	0	0	0	0				0	0	0	0	0	0	0	0	0	0	0	0	0	0	0	0	0	0	0	1	0	0	0	0	0	0	0	0	0
92	半乳糖血症		10		6			8	1	0	0	0	0	0	0	0	0				4	0	0	0	0	0	0	0	0	0	0	0	0	0	1	0	0	5	0	0	0	0	0	0	0	0	0	0	0
93	伴钙化与囊变的脑白质病		1		0			0	1	0	0	0	0	0	0	0	0				0	0	0	0	0	0	0	0	0	0	0	0	0	0	0	0	0	1	0	0	0	0	0	0	0	0	0	0	0
94	山德霍夫氏病		1		1			1	0	0	0	0	0	0	0	0	0				0	0	0	0	0	0	0	0	0	0	0	0	0	0	0	0	0	1	0	0	0	0	0	0	0	0	0	0	0
95	GM1神经节苷脂贮积症		0		0			0	0	0	0	0	0	0	0	0	0				0	0	0	0	0	0	0	0	0	0	0	0	0	0	0	0	0	0	0	0	0	0	0	0	0	0	0	0	0
96	卡纳万型脑白质营养不良		0		0			0	0	0	0	0	0	0	0	0	0				0	0	0	0	0	0	0	0	0	0	0	0	0	0	0	0	0	0	0	0	0	0	0	0	0	0	0	0	0
97	亚历山大病		1		1			1	0	0	0	0	0	0	0	0	0				0	0	0	0	0	0	0	0	0	0	0	0	0	0	0	0	0	1	0	0	0	0	0	0	0	0	0	0	0
98	巨脑型脑白质营养不良		0		0			0	0	0	0	0	0	0	0	0	0				0	0	0	0	0	0	0	0	0	0	0	0	0	0	0	0	0	0	0	0	0	0	0	0	0	0	0	0	0
99	克拉贝病		3		3			3	0	0	0	0	1	0	1	0	0				2	0	0	0	0	0	0	0	0	0	0	0	0	0	0	0	0	1	0	0	0	0	0	0	0	0	0	0	0
100	戈谢病		123		79			59	25	9	10	7	9	6	7	5	0				26	5	0	0	0	4	1	3	6	2	1	0	1	0	1	13	14	15	21	2	0	2	1	0	0	0	0	0	0
101	佩梅病		1		1			1	0	0	0	0	0	0	0	0	0				0	0	0	0	0	0	0	0	0	0	0	0	1	0	0	0	0	0	0	0	0	0	0	0	0	0	0	0	0
102	尼曼匹克病		86		53			47	16	9	8	4	4	3	0	2	0				14	2	1	0	0	2	9	0	7	0	3	0	1	0	13	9	3	12	1	1	0	0	2	0	1	0	1	0	0
103	异染性脑白质营养不良		21		13			14	3	2	2	2	1	0	0	0	0				9	0	0	0	0	1	0	0	2	0	0	0	2	0	0	1	0	1	2	0	0	1	0	0	0	0	1	0	0
104	法布雷病		69		51			24	5	17	13	26	5	3	0	0	0				19	0	0	0	0	10	0	1	27	0	0	0	0	0	1	3	3	2	2	0	0	0	0	0	1	0	0	0	0
105	神经元蜡样质脂褐素沉积症		21		14			11	13	1	1	0	0	0	0	0	0				14	0	0	0	0	2	0	0	0	0	0	0	0	0	0	1	0	2	0	0	0	0	0	0	0	0	0	0	0
106	黏多糖贮积症		507		310			92	60	16	38	45	54	100	83	52	10				23	0	0	0	0	379	3	2	21	4	3	0	1	0	9	3	10	10	15	1	0	1	6	0	1	0	4	0	2
107	家族性高乳糜微粒血症		0		0			0	0	0	0	0	0	0	0	0	0				0	0	0	0	0	0	0	0	0	0	0	0	0	0	0	0	0	0	0	0	0	0	0	0	0	0	0	0	0
108	线粒体胃肠脑肌病		0		0			0	0	0	0	0	0	0	0	0	0				0	0	0	0	0	0	0	0	0	0	0	0	0	0	0	0	0	0	0	0	0	0	0	0	0	0	0	0	0
109	卟啉病		92		30			15	7	37	26	8	7	2	4	0	0				25	1	12	0	0	3	5	0	3	5	1	0	3	0	4	4	4	3	2	4	0	6	4	0	0	0	0	0	0
110	体质性肝功能不良性黄疸		192		150			82	14	36	37	38	23	21	6	7	0				39	5	1	0	0	6	4	0	3	6	0	0	3	0	4	27	56	11	12	2	0	0	3	0	3	0	5	1	0
111	遗传性低镁血症		1		0			0	0	0	0	0	0	0	0	0	0				0	0	0	0	0	0	0	0	0	0	0	0	0	0	0	0	0	1	0	0	0	0	0	0	0	0	0	0	0
112	肝豆状核变性		3000		1660			945	692	853	695	365	188	61	24	4	0				265	33	9	0	0	61	70	26	400	18	193	0	111	0	128	184	198	307	440	42	0	16	365	0	31	0	23	17	3
113	门克斯病		12		11			10	0	1	0	1	0	1	0	0	0				2	0	0	0	0	0	3	0	0	0	0	0	1	0	0	0	0	3	0	0	0	0	2	0	0	0	1	0	0
114	低碱性磷酸酶血症		7		5			4	2	0	1	0	0	0	0	0	0				0	0	0	0	0	0	0	0	0	0	0	0	0	0	5	0	0	1	0	0	0	0	0	0	0	0	0	0	0
115	囊性纤维化		87		44			33	51	6	2	2	4	3	1	1	1				69	0	0	0	0	0	0	0	3	0	1	0	1	0	0	0	3	6	0	0	0	0	3	0	0	0	0	0	0
116	家族性地中海热		32		7			5	11	3	2	0	1	0	14	0	0				14	0	0	0	0	0	0	1	13	0	0	0	0	0	0	0	0	0	4	0	0	0	0	0	0	0	0	0	0
117	家族性淀粉样周围神经病		19		15			9	0	0	8	1	4	4	1	1	0				8	1	0	0	0	0	0	0	3	0	0	0	0	0	0	2	0	3	0	0	0	0	1	0	0	0	1	0	0
118	遗传性脑类淀粉血管病		0		0			0	0	0	0	0	0	0	0	0	0				0	0	0	0	0	0	0	0	0	0	0	0	0	0	0	0	0	0	0	0	0	0	0	0	0	0	0	0	0
119	原发性轻链型淀粉样变性		0		0			0	0	0	0	0	0	0	0	0	0				0	0	0	0	0	0	0	0	0	0	0	0	0	0	0	0	0	0	0	0	0	0	0	0	0	0	0	0	0
120	家族性高胆固醇血症		1714		852			52	20	33	70	137	368	505	362	197	18				99	1	0	0	0	8	0	0	22	1	6	0	0	0	4	1	7	10	18	0	0	3	2	0	0	0	0	2	1
121	假性甲状旁腺功能减低症		197		119			79	79	42	26	16	5	3	1	1	0				26	9	0	0	0	7	2	12	19	4	8	0	6	0	13	18	9	12	7	3	0	3	11	0	3	0	4	5	3
122	遗传性低血磷性佝偻病		0		0			0	0	0	0	0	0	0	0	0	0				0	0	0	0	0	0	0	0	0	0	0	0	0	0	0	0	0	0	0	0	0	0	0	0	0	0	0	0	0
123	ACTH非依赖性大结节样肾上腺增生		0		0			0	0	0	0	0	0	0	0	0	0				0	0	0	0	0	0	0	0	0	0	0	0	0	0	0	0	0	0	0	0	0	0	0	0	0	0	0	0	0
124	原发性色素性结节样肾上腺病		27		10			4	0	3	4	4	11	3	2	0	0				1	0	0	0	0	1	0	1	5	0	0	0	1	0	0	4	1	0	1	0	0	1	1	0	1	0	8	0	1
125	甲状腺激素抵抗综合征		71		33			20	3	13	13	9	7	8	4	0	1				1	1	0	0	0	1	0	0	14	3	4	0	1	0	13	10	0	9	3	0	0	1	1	0	0	0	2	0	1
126	低促性腺激素性性腺功能减退症		904		678			370	93	443	212	81	38	23	7	3	0				7	24	0	0	0	20	0	8	157	68	35	0	22	0	64	134	49	26	142	31	0	9	16	0	6	0	13	0	0
127	果糖-1，6-二磷酸酶缺乏症		0		0			0	0	0	0	0	0	0	0	0	0				0	0	0	0	0	0	0	0	0	0	0	0	0	0	0	0	0	0	0	0	0	0	0	0	0	0	0	0	0
128	丙酮酸脱氢酶E1-a缺乏症		0		0			0	0	0	0	0	0	0	0	0	0				0	0	0	0	0	0	0	0	0	0	0	0	0	0	0	0	0	0	0	0	0	0	0	0	0	0	0	0	0
129	a1－抗胰蛋白酶缺乏症		13		8			5	1	3	1	1	2	2	0	1	0				10	0	0	0	0	1	0	0	0	0	0	0	2	0	0	0	0	0	0	0	0	0	0	0	0	0	0	0	0
130	亨廷顿舞蹈症		117		53			25	3	4	9	19	37	33	10	1	1				28	2	0	0	0	9	1	1	9	1	12	0	0	0	0	8	5	5	4	1	0	1	17	0	5	0	1	0	3
131	脊髓小脑性共济失调		168		77			51	8	17	21	31	42	34	10	1	3				54	7	0	0	0	0	0	3	4	0	39	0	12	0	2	6	6	18	6	2	0	1	0	0	2	0	0	0	2
132	遗传性共济失调		364		216			104	16	27	53	69	94	76	13	1	9				20	3	1	0	0	16	3	7	38	4	25	0	18	0	36	11	11	43	39	10	0	17	21	0	11	0	11	0	5
133	弗里德赖希共济失调		14		6			2	2	3	2	2	3	0	0	0	0				0	0	0	0	0	0	0	0	0	0	0	0	0	0	0	8	1	0	0	1	0	0	0	0	0	0	0	0	0
134	毛细血管扩张共济失调症		8		4			2	4	0	1	0	1	0	0	2	0				4	0	0	0	0	0	0	0	2	0	0	0	0	0	0	0	1	0	0	0	0	0	0	0	1	0	0	0	0
135	遗传性痉挛性截瘫		298		193			93	23	68	65	60	42	24	10	2	0				79	1	0	0	0	12	4	1	15	4	14	0	5	0	16	21	18	8	30	3	0	14	30	0	5	0	8	0	2
136	运动神经元病		4057		2678			1357	15	65	135	451	989	1279	857	239	11				849	61	35	0	0	187	111	103	226	83	211	0	140	0	236	336	280	229	238	38	0	95	290	0	76	0	69	4	21
137	脊延髓肌萎缩症		101		97			56	1	2	7	21	35	28	4	3	0				54	0	0	0	0	0	5	0	6	0	3	0	4	0	6	5	3	4	6	1	0	1	1	0	0	0	1	0	0
138	脊髓性肌萎缩症		389		261			212	34	29	33	19	31	43	25	9	3				69	5	0	0	0	20	7	6	33	2	11	0	18	0	18	24	8	24	41	12	0	10	18	0	9	0	19	0	1
139	帕金森病（青年型、早发性）		315		189			100	3	18	86	207	0	0	0	0	0				98	2	0	0	0	6	5	3	32	4	12	0	4	0	6	22	30	17	21	3	0	4	21	0	11	0	7	0	1
140	苍白球脑桥黑质变性		30		18			13	6	3	3	0	2	8	2	5	0				5	0	0	0	0	2	0	0	0	2	0	0	1	0	0	1	1	12	2	0	0	0	2	0	1	0	0	0	0
141	遗传性肌张力不全		27		10			9	8	2	1	7	3	0	1	3	0				0	0	0	0	0	0	0	0	0	0	0	0	2	0	2	2	8	2	5	1	0	0	1	0	1	0	0	0	0
142	额颞叶痴呆		140		84			58	0	1	0	3	15	43	26	26	26				10	1	0	0	0	8	0	6	9	1	2	0	13	0	33	8	4	6	18	1	0	3	4	0	4	0	2	0	1
143	亚急性坏死性脑脊髓病		219		159			69	11	7	17	27	43	47	36	19	0				11	0	0	0	0	0	42	0	1	74	0	0	0	0	70	1	2	2	1	1	0	0	2	0	0	0	3	0	0
144	路易体痴呆		335		215			128	0	0	0	1	10	38	97	137	52				72	6	1	0	0	19	1	14	10	1	36	0	11	0	23	17	8	14	64	3	0	8	20	0	0	0	4	0	1
145	高血钾型周期性瘫痪		6		5			2	3	0	1	2	0	0	0	0	0				1	0	0	0	0	0	0	0	0	0	0	0	0	0	0	1	0	2	1	0	0	0	0	0	1	0	0	0	0
146	肌阵挛性癫痫伴破碎红纤维（MERRF）		1		0			0	0	0	0	0	0	0	0	0	0				0	0	0	0	0	0	0	0	0	0	0	0	0	0	0	0	0	1	0	0	0	0	0	0	0	0	0	0	0
147	常染色体显性遗传性癫痫伴听觉特征		0		0			0	0	0	0	0	0	0	0	0	0				0	0	0	0	0	0	0	0	0	0	0	0	0	0	0	0	0	0	0	0	0	0	0	0	0	0	0	0	0
148	常染色体显性遗传性夜发性额叶癫痫		6		2			2	2	2	0	0	1	0	0	0	0				2	0	0	0	0	0	0	0	0	0	0	0	0	0	0	0	0	0	3	0	0	0	0	0	0	0	1	0	0
149	良性家族性新生儿婴儿惊厥		15		6			6	0	0	0	0	0	0	0	0	0				0	0	0	0	0	0	0	2	2	0	0	0	0	0	3	2	0	5	0	1	0	0	0	0	0	0	0	0	0
150	青少年肌阵挛癫痫		51		28			20	31	14	4	0	1	0	1	0	0				18	0	0	0	0	2	0	0	3	0	1	0	1	0	0	2	0	0	17	2	0	0	1	0	0	0	0	0	1
151	Lennox-Gastaut 综合征		141		87			75	71	14	4	0	0	0	0	0	0				88	0	1	0	0	0	6	0	5	0	0	0	1	0	0	1	1	9	9	0	0	0	1	0	1	0	0	0	0
152	婴儿严重肌阵挛性癫痫		104		57			72	13	0	0	0	0	0	0	0	0				16	0	0	0	0	0	0	1	6	0	3	0	1	0	4	8	0	52	3	5	0	0	0	0	1	0	3	0	0
153	维生素B6依赖性癫痫		0		0			0	0	0	0	0	0	0	0	0	0				0	0	0	0	0	0	0	0	0	0	0	0	0	0	0	0	0	0	0	0	0	0	0	0	0	0	0	0	0
154	早发家族性偏瘫型偏头痛		2		2			1	0	0	1	0	1	0	0	0	0				0	0	0	0	0	1	0	0	0	0	0	0	0	0	0	0	0	0	1	0	0	0	0	0	0	0	0	0	0
155	发作性睡病		961		659			289	584	100	68	61	51	39	29	5	1				236	1	4	0	0	36	7	12	70	6	67	0	2	0	80	299	28	37	20	0	0	2	18	0	9	0	19	0	1
156	遗传性感觉神经病		13		11			4	5	0	1	1	1	4	0	0	0				9	0	0	0	0	2	0	0	0	0	1	0	0	0	0	0	0	1	0	0	0	0	0	0	0	0	0	0	0
157	遗传性运动神经病		36		25			14	5	5	4	4	2	9	1	1	0				19	0	1	0	0	0	0	0	1	0	0	0	1	0	1	3	2	0	2	0	0	0	6	0	0	0	0	0	0
158	遗传性自主神经病		1		1			1	0	0	0	0	0	0	0	0	0				1	0	0	0	0	0	0	0	0	0	0	0	0	0	0	0	0	0	0	0	0	0	0	0	0	0	0	0	0
159	腓骨肌萎缩症		264		160			82	27	52	52	37	49	31	12	4	0				70	6	2	0	0	7	3	7	21	3	15	0	5	0	19	17	5	17	25	0	0	8	11	0	6	0	5	2	0
160	巨轴索神经病		3		1			0	0	0	0	2	1	0	0	0	0				1	0	0	0	0	0	0	0	0	0	0	0	0	0	0	0	2	0	0	0	0	0	0	0	0	0	0	0	0
161	多灶性运动神经病		139		93			50	1	5	6	28	41	39	15	3	1				39	2	0	0	0	1	0	1	14	0	11	0	5	0	4	12	1	15	10	3	0	9	0	0	1	0	1	0	3
162	慢性炎性脱髓鞘性多发神经病		1631		1035			622	64	144	155	174	350	404	206	94	7				329	28	20	0	0	26	23	43	233	19	88	0	55	0	55	39	78	163	114	20	0	25	204	0	33	0	18	3	4
163	先天性肌无力综合征		10		8			6	3	0	0	1	0	1	1	1	0				8	0	0	0	0	0	0	0	0	0	0	0	0	0	0	0	0	2	0	0	0	0	0	0	0	0	0	0	0
164	线粒体脑肌病伴高乳酸血症和脑卒中样发作（MELAS）		194		111			62	48	64	26	20	20	8	0	0	0				134	2	0	0	0	1	4	0	0	0	4	0	6	0	0	0	3	6	0	0	0	0	33	0	1	0	0	0	0
165	肢带型肌营养不良1型		0		0			0	0	0	0	0	0	0	0	0	0				0	0	0	0	0	0	0	0	0	0	0	0	0	0	0	0	0	0	0	0	0	0	0	0	0	0	0	0	0
166	肢带型肌营养不良2型		0		0			0	0	0	0	0	0	0	0	0	0				0	0	0	0	0	0	0	0	0	0	0	0	0	0	0	0	0	0	0	0	0	0	0	0	0	0	0	0	0
167	抗肌萎缩蛋白病		926		740			544	269	106	72	80	67	48	12	2	0				93	27	4	0	0	40	10	20	48	7	40	0	21	0	46	112	44	62	83	64	0	20	59	0	16	0	29	5	2
168	远端性肌病		20		15			7	1	5	5	7	2	0	0	0	0				14	0	0	0	0	0	0	0	1	0	1	0	0	0	0	0	0	0	1	0	0	0	3	0	0	0	0	0	0
169	中央核肌病		0		0			0	0	0	0	0	0	0	0	0	0				0	0	0	0	0	0	0	0	0	0	0	0	0	0	0	0	0	0	0	0	0	0	0	0	0	0	0	0	0
170	中央轴空病		0		0			0	0	0	0	0	0	0	0	0	0				0	0	0	0	0	0	0	0	0	0	0	0	0	0	0	0	0	0	0	0	0	0	0	0	0	0	0	0	0
171	性连锁肌管肌病		0		0			0	0	0	0	0	0	0	0	0	0				0	0	0	0	0	0	0	0	0	0	0	0	0	0	0	0	0	0	0	0	0	0	0	0	0	0	0	0	0
172	软骨萎缩性肌强直		0		0			0	0	0	0	0	0	0	0	0	0				0	0	0	0	0	0	0	0	0	0	0	0	0	0	0	0	0	0	0	0	0	0	0	0	0	0	0	0	0
173	埃梅里－德赖弗斯肌营养不良		3		3			3	2	0	0	0	1	0	0	0	0				3	0	0	0	0	0	0	0	0	0	0	0	0	0	0	0	0	0	0	0	0	0	0	0	0	0	0	0	0
174	眼咽型肌营养不良		17		12			7	2	0	3	2	1	6	3	0	0				9	0	0	0	0	0	0	0	2	0	2	0	1	0	2	0	0	1	0	0	0	0	0	0	0	0	0	0	0
175	面肩肱型肌营养不良		46		34			23	3	17	3	12	7	4	0	0	0				14	0	0	0	0	3	3	1	2	0	3	0	2	0	2	0	1	4	9	0	0	1	0	0	0	0	0	0	0
176	肌强直性肌营养不良		125		77			43	3	13	23	39	33	12	0	0	0				48	0	0	0	0	7	3	0	5	1	8	0	3	0	16	1	4	4	6	0	0	1	14	0	2	0	0	1	0
177	先天性肌强直		17		12			4	1	7	1	0	0	4	2	0	0				5	0	0	0	0	0	0	0	1	0	0	0	0	0	0	2	0	2	3	0	0	2	1	0	0	0	0	0	0
178	先天性肌营养不良		20		12			7	7	3	2	0	0	0	0	0	0				14	0	0	0	0	0	1	0	0	0	0	0	0	0	0	0	0	4	0	0	0	0	1	0	0	0	0	0	0
179	杆状体肌病		5		5			5	1	1	0	0	2	0	1	0	0				5	0	0	0	0	0	0	0	0	0	0	0	0	0	0	0	0	0	0	0	0	0	0	0	0	0	0	0	0
180	先天性肌型比例失调		0		0			0	0	0	0	0	0	0	0	0	0				0	0	0	0	0	0	0	0	0	0	0	0	0	0	0	0	0	0	0	0	0	0	0	0	0	0	0	0	0
181	周期性瘫痪		680		580			276	34	116	218	174	80	33	16	5	0				86	15	16	0	0	23	33	46	26	21	29	0	5	0	33	160	34	18	11	19	0	5	6	0	6	0	41	6	9
182	低血钾型周期性瘫痪		2211		1912			930	50	394	671	528	318	159	53	21	13				168	74	12	0	0	65	26	234	127	44	50	0	44	0	97	194	153	179	79	30	0	103	168	0	67	0	85	12	95
183	包涵体肌炎		52		36			24	0	2	6	3	13	10	10	2	0				16	4	0	0	0	5	0	0	5	0	0	0	2	0	0	11	0	0	4	1	0	2	1	0	0	0	1	0	0
184	遗传性包涵体肌病		7		6			5	0	0	3	1	0	0	0	0	0				3	0	0	0	0	0	0	0	0	0	0	0	1	0	0	3	0	0	0	0	0	0	0	0	0	0	0	0	0
185	Lambert-Eaton综合征		329		204			120	5	11	10	27	59	102	69	31	3				108	7	5	0	0	5	19	13	31	2	4	0	10	0	48	21	6	13	6	4	0	2	3	0	0	0	6	0	2
186	特发性肺纤维化		3764		2580			1579	5	10	45	111	323	875	1071	1005	319				478	9	6	0	0	198	59	58	127	154	24	0	30	0	196	362	18	152	88	45	0	79	388	0	14	0	162	2	965
187	进行性家族性肝内胆汁淤积症		4		0			0	1	0	0	0	0	0	0	0	0				1	2	0	0	0	0	0	0	0	0	1	0	0	0	0	0	0	0	0	0	0	0	0	0	0	0	0	0	0
188	皮肤松弛症		1432		218			107	5	58	149	318	424	264	106	90	17				1129	18	0	0	0	8	23	12	59	8	19	0	12	0	6	10	58	7	29	0	0	5	4	0	10	0	3	0	1
189	先天性厚甲		2		2			1	1	0	0	0	0	0	0	0	0				0	0	0	0	0	0	0	0	0	0	0	0	0	0	0	0	1	1	0	0	0	0	0	0	0	0	0	0	0
190	遗传性色素性皮肤病		60		38			21	0	1	4	3	16	15	10	10	1				1	0	0	0	0	5	2	3	2	0	1	0	0	0	3	1	2	7	3	0	0	4	0	0	0	0	4	0	1
191	毛囊闭锁三联症		35		33			18	0	16	10	4	2	3	0	0	0				11	0	0	0	0	1	3	0	1	1	0	0	0	0	0	3	1	3	8	0	0	0	0	0	0	0	0	0	0
192	结节性多动脉炎		351		235			136	12	26	40	63	69	69	51	19	0				83	5	3	0	0	25	10	2	17	8	43	0	3	0	7	29	9	13	43	9	0	2	6	0	2	0	8	0	0
193	系统性硬化病		3252		621			337	42	100	254	502	965	828	438	111	9				818	182	37	0	0	238	131	141	117	6	271	0	99	0	93	25	128	423	33	47	0	1	124	0	138	0	10	32	4
194	免疫性坏死性肌肉病		129		69			41	5	12	25	21	24	24	12	3	1				51	2	0	0	0	0	1	1	2	0	1	0	0	0	2	1	21	3	1	0	0	1	42	0	0	0	0	0	0
195	进行性骨化性肌炎		18		8			7	4	3	1	1	3	4	0	0	0				6	0	0	0	0	1	1	2	1	2	1	0	0	0	0	0	0	2	0	0	0	0	2	0	0	0	0	0	0
196	骨膜增生厚皮症		37		34			19	1	17	13	1	3	1	0	0	0				16	1	0	0	0	0	0	0	2	3	0	0	1	0	0	5	0	4	0	2	0	0	2	0	0	0	0	0	0
197	变形综合征		2		2			2	1	0	0	0	1	0	0	0	0				1	1	0	0	0	0	0	0	0	0	0	0	0	0	0	0	0	0	0	0	0	0	0	0	0	0	0	0	0
198	淋巴管肌瘤病		47		3			1	0	5	10	10	15	7	0	0	0				10	1	0	0	0	3	6	2	1	1	2	0	1	0	0	0	2	12	2	0	0	0	2	0	2	0	0	0	0
199	多巴反应性肌张力不全		78		34			25	16	10	13	16	8	4	0	0	0				20	0	0	0	0	5	0	0	7	0	2	0	3	0	3	4	3	10	7	5	0	0	1	0	0	0	0	0	0
200	先天性脊柱侧凸		1394		597			459	584	188	88	41	69	39	34	16	3				497	0	6	0	0	21	11	10	17	257	7	0	11	0	139	37	41	58	84	42	0	9	59	0	3	0	13	9	7
201	常染色体隐性遗传激素抵抗肾病综合征		0		0			0	0	0	0	0	0	0	0	0	0				0	0	0	0	0	0	0	0	0	0	0	0	0	0	0	0	0	0	0	0	0	0	0	0	0	0	0	0	0
202	常染色体显性遗传激素抵抗肾病综合征		0		0			0	0	0	0	0	0	0	0	0	0				0	0	0	0	0	0	0	0	0	0	0	0	0	0	0	0	0	0	0	0	0	0	0	0	0	0	0	0	0
203	先天性肾性尿崩症		0		0			0	0	0	0	0	0	0	0	0	0				0	0	0	0	0	0	0	0	0	0	0	0	0	0	0	0	0	0	0	0	0	0	0	0	0	0	0	0	0
204	Lowe综合征		21		18			19	3	0	0	1	0	0	0	0	0				10	0	0	0	0	3	1	0	3	0	0	0	0	0	0	0	0	1	1	0	0	0	1	0	0	0	0	0	0
205	多发性大动脉炎		1607		337			170	177	281	375	282	217	143	67	26	1				455	39	0	0	0	49	22	96	164	51	27	0	42	0	108	139	59	21	65	1	0	10	93	0	8	0	104	5	7
206	遗传性囊性肾病		0		0			0	0	0	0	0	0	0	0	0	0				0	0	0	0	0	0	0	0	0	0	0	0	0	0	0	0	0	0	0	0	0	0	0	0	0	0	0	0	0
207	特发性结节样肾小球硬化		1		1			0	0	0	1	0	0	0	0	0	0				0	0	0	0	0	0	0	0	0	0	0	0	0	0	0	0	0	0	0	0	0	0	0	0	1	0	0	0	0
208	永久性新生儿糖尿病		0		0			0	0	0	0	0	0	0	0	0	0				0	0	0	0	0	0	0	0	0	0	0	0	0	0	0	0	0	0	0	0	0	0	0	0	0	0	0	0	0
209	Joubert 综合征		3		0			0	1	0	1	0	0	0	0	0	0				0	0	0	0	0	0	0	0	0	0	0	0	1	0	0	0	0	0	0	1	0	0	0	0	0	0	0	0	0
210	无虹膜症		127		72			70	18	17	15	15	13	4	2	0	0				65	0	3	0	0	1	2	2	4	1	0	0	0	0	5	0	7	2	31	0	0	0	3	0	1	0	0	0	0
211	Alagille 综合征		1046		617			356	32	23	32	78	202	280	223	99	15				364	8	5	0	0	2	4	18	62	23	22	0	6	0	67	7	26	117	137	4	0	2	8	0	12	0	91	14	42
212	常染色体隐性遗传多囊肾病		8		4			3	0	0	2	0	1	1	2	1	0				2	0	0	0	0	3	0	0	3	0	0	0	0	0	0	0	0	0	0	0	0	0	0	0	0	0	0	0	0
213	轴前肢端骨发育不全		0		0			0	0	0	0	0	0	0	0	0	0				0	0	0	0	0	0	0	0	0	0	0	0	0	0	0	0	0	0	0	0	0	0	0	0	0	0	0	0	0
214	软骨发育不良		292		189			206	51	17	11	8	4	4	4	2	0				67	0	0	0	0	4	2	3	21	19	0	0	5	0	4	10	3	110	2	5	0	5	2	0	3	0	15	1	0
215	软骨发育不全		112		59			64	31	7	1	2	0	2	0	0	0				21	0	0	0	0	0	1	0	9	0	6	0	12	0	8	15	4	2	10	4	0	0	3	0	0	0	6	0	0
216	成骨不全症		469		255			182	263	51	26	10	4	6	1	5	0				41	5	0	0	0	21	5	0	28	2	2	0	5	0	230	13	16	16	5	1	0	14	18	0	1	0	3	0	0
217	McCune-Albright 综合征		136		43			32	71	15	17	10	6	0	1	0	0				46	0	0	0	0	4	2	1	35	0	7	0	1	0	9	2	1	5	10	1	0	1	2	0	0	0	0	0	0
218	多发性骨骺发育不良		66		44			31	38	11	4	4	1	0	0	0	0				42	0	0	0	0	2	2	0	4	1	0	0	0	0	1	2	1	2	3	3	0	1	1	0	0	0	0	0	0
219	X-连锁鱼鳞病		2		2			2	0	0	1	0	0	0	0	1	0				1	0	0	0	0	0	0	0	0	0	0	0	0	0	0	0	0	0	0	0	0	0	1	0	0	0	0	0	0
220	遗传性大疱性表皮松解症		1		0			0	0	0	0	0	0	0	0	0	0				0	0	0	0	0	0	0	0	0	0	0	0	0	0	0	0	0	0	0	0	0	0	0	0	0	0	0	0	0
221	掌跖角化症		34		19			12	2	5	4	2	5	7	5	2	0				7	1	0	0	0	0	1	0	1	0	2	0	0	0	2	2	0	5	4	2	0	0	5	0	0	0	1	0	0
222	着色性干皮病		54		32			25	8	7	5	23	2	1	0	0	0				26	0	0	0	0	0	0	1	1	0	0	0	0	0	1	3	0	6	0	0	0	0	6	0	0	0	0	0	0
223	色素失禁症		108		21			53	15	4	1	2	3	4	1	1	0				32	2	0	0	0	3	4	1	12	0	5	0	1	0	7	11	2	3	9	2	0	0	4	0	1	0	1	0	0
224	外胚层发育不良		87		57			57	13	7	1	2	0	1	0	0	0				31	0	0	0	0	5	0	0	10	0	5	0	0	0	9	6	1	4	3	7	0	0	2	0	1	0	0	0	0
225	先天性角化不良		27		18			10	6	3	0	1	4	6	5	1	0				18	1	0	0	0	0	1	0	0	0	0	0	0	0	0	0	0	4	0	0	0	0	3	0	0	0	0	0	0
226	神经纤维瘤		2081		1067			655	382	410	317	231	270	206	99	36	5				417	82	14	0	0	42	46	19	129	63	105	0	215	0	142	21	39	323	176	32	0	19	94	0	45	0	15	3	3
227	结节性硬化症		1064		561			327	126	211	267	86	68	41	6	7	0				440	1	4	0	0	31	94	4	106	4	24	0	23	0	87	69	17	43	44	14	0	3	15	0	6	0	10	1	0
228	黑斑息肉综合征		149		71			50	34	33	31	24	13	6	4	2	0				56	0	0	0	0	0	0	0	19	0	0	0	3	0	21	0	0	31	0	14	0	0	0	0	4	0	0	0	0
229	林岛综合征		66		36			10	0	7	16	25	11	7	0	0	0				16	7	0	0	0	2	0	0	6	6	1	0	4	0	10	1	2	2	6	1	0	0	1	0	0	0	0	0	0
230	Goldenhar综合征		99		64			61	20	16	2	0	0	0	0	0	0				70	0	0	0	0	8	4	0	0	0	0	0	0	0	0	0	6	0	1	0	0	0	3	0	3	0	4	0	0
231	歌舞伎面谱综合征		6		1			3	2	0	0	0	0	0	0	0	0				6	0	0	0	0	0	0	0	0	0	0	0	0	0	0	0	0	0	0	0	0	0	0	0	0	0	0	0	0
232	Fraser综合征		39		29			27	10	1	3	0	1	0	0	0	0				0	0	0	0	0	0	0	0	1	0	0	0	0	0	19	2	0	0	13	0	0	2	0	0	0	0	2	0	0
233	Silver-Russell 综合征		13		7			4	7	0	0	0	0	0	0	0	0				11	0	0	0	0	0	0	0	0	0	0	0	0	0	1	0	0	0	1	0	0	0	0	0	0	0	0	0	0
234	德朗热综合征		2		1			0	1	0	1	0	0	0	0	0	0				1	0	0	0	0	0	1	0	0	0	0	0	0	0	0	0	0	0	0	0	0	0	0	0	0	0	0	0	0
235	柯凯因综合征		9		5			3	9	0	0	0	0	0	0	0	0				9	0	0	0	0	0	0	0	0	0	0	0	0	0	0	0	0	0	0	0	0	0	0	0	0	0	0	0	0
236	Noonan综合征		15		13			9	7	4	1	0	1	0	0	0	0				9	0	0	0	0	0	0	0	0	0	0	0	1	0	1	1	0	3	0	0	0	0	0	0	0	0	0	0	0
237	指甲髌骨综合症		7		3			2	1	0	0	1	0	0	1	0	0				2	0	0	0	0	0	0	0	0	0	1	0	0	0	1	0	0	2	1	0	0	0	0	0	0	0	0	0	0
238	Rubinstein-Taybi 综合征		1		0			0	0	0	0	0	0	0	0	0	0				0	0	0	0	0	0	0	0	0	0	0	0	0	0	0	0	0	0	0	0	0	0	0	0	0	0	0	0	0
239	马凡综合征		1751		1051			593	268	344	460	301	198	104	19	2	1				498	12	6	0	0	47	32	34	212	51	71	0	50	0	64	76	44	125	225	37	0	18	87	0	18	0	10	0	2
240	威廉姆斯综合征		20		11			11	9	2	0	0	0	0	0	0	0				19	0	0	0	0	0	0	0	0	0	0	0	1	0	0	0	0	0	0	0	0	0	0	0	0	0	0	0	0
241	Alport 综合征		250		175			118	135	40	27	5	1	0	2	1	1				79	2	0	0	0	1	5	1	17	5	11	0	1	0	0	2	42	19	41	2	0	0	7	0	11	0	1	0	0
242	Prader-Willi 综合征		102		60			56	44	7	5	0	1	0	0	0	0				38	0	0	0	0	0	16	0	0	0	0	0	0	0	19	2	0	7	13	0	0	2	1	0	2	0	2	0	0
243	原发性纤毛运动障碍		123		61			46	50	12	13	5	5	7	1	3	0				52	0	0	0	0	2	0	1	8	5	0	0	5	0	10	1	2	10	5	10	0	0	6	0	1	0	0	0	0
244	猫叫综合征		23		10			15	1	0	0	0	0	0	0	2	0				1	1	0	0	0	4	0	0	3	0	0	0	0	0	1	3	1	2	0	0	0	0	4	0	0	0	3	0	0
245	Angelman 综合征		42		28			29	7	0	0	0	0	0	0	0	0				10	0	0	0	0	4	10	0	4	0	2	0	0	0	2	0	2	4	2	1	0	0	1	0	0	0	0	0	0
246	特纳综合征		291		0			8	113	91	35	26	4	2	0	0	0				43	1	0	0	0	9	0	2	39	6	12	0	12	0	11	30	6	17	27	9	0	2	22	0	7	0	3	9	0
247	克氏综合症		141		129			88	4	50	58	14	5	0	1	2	0				57	4	2	0	0	3	2	0	7	7	8	0	4	0	3	3	5	5	11	0	0	1	7	0	1	0	3	1	0
248	脆性X染色体综合征		11		10			6	4	1	0	0	1	2	0	0	0				6	0	0	0	0	0	0	0	0	0	0	0	0	0	0	0	0	2	2	0	0	1	0	0	0	0	0	0	0
249	巴德尔－别德尔综合征		34		2			2	2	2	12	6	5	6	0	0	0				21	0	3	0	0	0	0	0	0	0	3	0	0	0	0	1	5	0	0	0	0	0	0	0	0	0	0	0	0
250	特发性肺含铁血黄素沉着症		42		12			10	19	2	1	0	0	0	0	0	0				37	0	0	0	0	0	0	0	0	0	0	0	0	0	0	0	0	0	0	0	0	0	0	0	1	0	0	3	0
251	先天性中枢性低通气综合征		0		0			0	0	0	0	0	0	0	0	0	0				0	0	0	0	0	0	0	0	0	0	0	0	0	0	0	0	0	0	0	0	0	0	0	0	0	0	0	0	0
252	遗传性支气管扩张		0		0			0	0	0	0	0	0	0	0	0	0				0	0	0	0	0	0	0	0	0	0	0	0	0	0	0	0	0	0	0	0	0	0	0	0	0	0	0	0	0
253	IgG4相关性疾病		900		540			364	11	24	49	80	190	287	158	89	6				206	44	0	0	0	52	0	12	126	67	22	0	31	0	84	27	8	19	107	17	0	2	31	0	0	0	1	0	0
254	Treacher Collins 综合征		52		27			22	10	15	4	3	1	1	3	0	0				22	0	0	0	0	0	0	0	7	0	0	0	0	0	1	1	2	4	4	0	0	0	3	0	0	0	6	0	0
255	石骨症		211		145			134	25	5	7	10	10	10	4	0	0				156	0	0	0	0	4	1	1	8	2	0	0	2	0	1	3	5	9	8	0	0	0	5	0	0	0	2	0	1
256	肺静脉闭塞病		45		25			19	2	5	4	4	4	16	8	1	0				24	0	0	0	0	8	3	0	0	0	1	0	0	0	0	0	0	2	5	0	0	0	0	0	0	0	0	1	0
257	消化道神经内分泌肿瘤		0		0			0	0	0	0	0	0	0	0	0	0				0	0	0	0	0	0	0	0	0	0	0	0	0	0	0	0	0	0	0	0	0	0	0	0	0	0	0	0	0
258	胰腺囊性肿瘤		0		0			0	0	0	0	0	0	0	0	0	0				0	0	0	0	0	0	0	0	0	0	0	0	0	0	0	0	0	0	0	0	0	0	0	0	0	0	0	0	0
259	X-连锁高IgM血症		2		2			2	2	0	0	0	0	0	0	0	0				0	0	0	0	0	0	0	0	0	0	0	0	0	0	0	0	0	2	0	0	0	0	0	0	0	0	0	0	0
260	丙酮酸激酶缺乏症		1		1			1	0	0	0	0	1	0	0	0	0				0	1	0	0	0	0	0	0	0	0	0	0	0	0	0	0	0	0	0	0	0	0	0	0	0	0	0	0	0
261	白质消融性白质脑炎		0		0			0	0	0	0	0	0	0	0	0	0				0	0	0	0	0	0	0	0	0	0	0	0	0	0	0	0	0	0	0	0	0	0	0	0	0	0	0	0	0
262	遗传性弥漫性白质脑病伴轴索球样变		0		0			0	0	0	0	0	0	0	0	0	0				0	0	0	0	0	0	0	0	0	0	0	0	0	0	0	0	0	0	0	0	0	0	0	0	0	0	0	0	0
263	β – 酮硫解酶缺乏症		0		0			0	0	0	0	0	0	0	0	0	0				0	0	0	0	0	0	0	0	0	0	0	0	0	0	0	0	0	0	0	0	0	0	0	0	0	0	0	0	0
264	溶酶体酸性脂肪酶缺乏症		0		0			0	0	0	0	0	0	0	0	0	0				0	0	0	0	0	0	0	0	0	0	0	0	0	0	0	0	0	0	0	0	0	0	0	0	0	0	0	0	0
265	谷固醇血症		0		0			0	0	0	0	0	0	0	0	0	0				0	0	0	0	0	0	0	0	0	0	0	0	0	0	0	0	0	0	0	0	0	0	0	0	0	0	0	0	0
266	神经轴索营养不良		0		0			0	0	0	0	0	0	0	0	0	0				0	0	0	0	0	0	0	0	0	0	0	0	0	0	0	0	0	0	0	0	0	0	0	0	0	0	0	0	0
267	家族性发作性运动诱发性运动障碍		0		0			0	0	0	0	0	0	0	0	0	0				0	0	0	0	0	0	0	0	0	0	0	0	0	0	0	0	0	0	0	0	0	0	0	0	0	0	0	0	0
268	Ⅵ型胶原蛋白相关肌病		0		0			0	0	0	0	0	0	0	0	0	0				0	0	0	0	0	0	0	0	0	0	0	0	0	0	0	0	0	0	0	0	0	0	0	0	0	0	0	0	0
269	肌原纤维肌病		0		0			0	0	0	0	0	0	0	0	0	0				0	0	0	0	0	0	0	0	0	0	0	0	0	0	0	0	0	0	0	0	0	0	0	0	0	0	0	0	0
270	结蛋白病		0		0			0	0	0	0	0	0	0	0	0	0				0	0	0	0	0	0	0	0	0	0	0	0	0	0	0	0	0	0	0	0	0	0	0	0	0	0	0	0	0
271	先天性胆汁酸合成障碍		0		0			0	0	0	0	0	0	0	0	0	0				0	0	0	0	0	0	0	0	0	0	0	0	0	0	0	0	0	0	0	0	0	0	0	0	0	0	0	0	0
272	自身免疫性小肠炎		0		0			0	0	0	0	0	0	0	0	0	0				0	0	0	0	0	0	0	0	0	0	0	0	0	0	0	0	0	0	0	0	0	0	0	0	0	0	0	0	0
273	Blau综合征		40		21			20	21	0	3	0	0	0	0	0	0				36	0	0	0	0	0	0	0	0	0	0	0	3	0	0	0	0	0	1	0	0	0	0	0	0	0	0	0	0
274	Schimke免疫骨发育不良		0		0			0	0	0	0	0	0	0	0	0	0				0	0	0	0	0	0	0	0	0	0	0	0	0	0	0	0	0	0	0	0	0	0	0	0	0	0	0	0	0
275	热纳综合征		0		0			0	0	0	0	0	0	0	0	0	0				0	0	0	0	0	0	0	0	0	0	0	0	0	0	0	0	0	0	0	0	0	0	0	0	0	0	0	0	0
276	假性软骨发育不全		0		0			0	0	0	0	0	0	0	0	0	0				0	0	0	0	0	0	0	0	0	0	0	0	0	0	0	0	0	0	0	0	0	0	0	0	0	0	0	0	0
277	非综合征性耳聋		0		0			0	0	0	0	0	0	0	0	0	0				0	0	0	0	0	0	0	0	0	0	0	0	0	0	0	0	0	0	0	0	0	0	0	0	0	0	0	0	0
278	家族性皮层肌阵挛震颤伴癫痫		0		0			0	0	0	0	0	0	0	0	0	0				0	0	0	0	0	0	0	0	0	0	0	0	0	0	0	0	0	0	0	0	0	0	0	0	0	0	0	0	0
279	肌酸缺乏综合征		0		0			0	0	0	0	0	0	0	0	0	0				0	0	0	0	0	0	0	0	0	0	0	0	0	0	0	0	0	0	0	0	0	0	0	0	0	0	0	0	0
280	息肉状脉络膜血管病变		41		26			14	0	0	2	1	2	16	9	11	0				1	0	0	0	0	0	0	0	0	0	0	0	2	0	17	0	0	20	1	0	0	0	0	0	0	0	0	0	0
281	极早发型炎症性肠病		0		0			0	0	0	0	0	0	0	0	0	0				0	0	0	0	0	0	0	0	0	0	0	0	0	0	0	0	0	0	0	0	0	0	0	0	0	0	0	0	0
			106746		53852			36085	12268	9252	16782	12646	13646	12299	7633	4455	1003	126069			25768	1983	308	0	0	2758	1856	3105	7712	2540	2818	0	2349	0	4723	5214	4395	5021	14167	5641	0	2058	5257	0	1009	0	1500	220	2071
[truncated: 2 more columns]

## Sheet: TRDL
NO.	Name of disease	Total No. of hospitalizations	2014	2015
1	Thalassemia	14855	6782	8073
2	Idiopathic pulmonary arterial hypertension，IPAH*	9536	4661	4875
3	Pulmonary Langerhans’cell histiocytosis， PLCH*	7657	3302	4355
4	Moyamoya disease	7419	3441	3978
5	Motor neuron disease*	4057	2030	2027
6	Idiopathic pulmory fibrosis*	3764	1470	2294
7	Systemic sclerosis*	3252	1522	1730
8	Hepatolenticular degeneration，HLD*	3000	1433	1567
9	Coarctation of the aorta, CoA	2654	1269	1385
10	Transposition of great artery, TGA	2221	1082	1139
11	Hypokalemic Periodic paralysis	2211	1130	1081
12	Neurofibromatosis	2081	940	1141
13	Acromcgaly	1988	870	1118
14	Retinitis pigmentosa*	1852	886	966
15	Marfan syndrome*	1751	820	931
16	Familial hypercholesterolemia, FH*	1714	1610	104
17	Chronic inflammatory demyelinating polyradiculoneuropathy，CIDP	1631	696	935
18	Takayasu's arteritis	1607	752	855
19	Cutis Laxa	1432	668	764
20	Congenital scoliosis*	1394	802	592
21	Paroxysmal nocturnal hemoglobinia*	1337	629	708
22	Glucose-6-phosphate dehydrogenase, G6PD	1306	390	916
23	POEMS syndrome*	1213	595	618
24	Glycogen storage disease*	1178	611	567
25	Diamond-Blackfan anemia*	1113	546	567
26	Tuberous sclerosis complex，TSC*	1064	643	421
27	Congenital adrenal cortical hyperplasia	1063	475	588
28	Alagille syndrome	1046	439	607
29	Narcolepsy	961	529	432
30	Dystrophinopathy	926	421	505
31	Hypogonadotropic hypogonadism*	904	424	480
32	IgG4 related diseases*	900	330	570
33	Thrombotic thrombocytopenic purpura, TTP	688	403	285
34	Periodic paralysis	680	352	328
35	Hemolytic uremic syndrome*	532	265	267
36	Mucopolysaccharidosis*	507	391	116
37	Methylmalonic academia*	470	237	233
38	Osteogenesis imperfecta，OI*	469	238	231
39	Spinal muscular atrophy*	389	199	190
40	Hereditary ataxia	364	189	175
41	Bartter syndrome	353	184	169
42	Polyarteritis nodosa	351	158	193
43	Fanconi anemia*	350	164	186
44	Lewy dementia	335	146	189
45	Albinism*	333	166	167
46	Arrhythmogenic right ventricular cardiomypathy, ARVC	329	170	159
47	Lambert-Eaton Syndrome，LEMS	329	130	199
48	Parkinson disease (young-onset, early-onset) *	315	149	166
49	Castleman disease, CD*	301	67	234
50	Hereditary spastic paraplegia*	298	144	154
51	Hypochondroplasia	292	116	176
52	Turner syndrome	291	135	156
53	Multiple endocrine neoplasia	276	120	156
54	Gitelman syndrome*	266	137	129
55	Charcot-maric-tooth disease*	264	117	147
56	Hashimoto encephalopathy	256	121	135
57	Alport syndrome*	250	102	148
58	Phenylketouria*	246	122	124
59	Subacute necrotizing encephalomyelopathy	219	145	74
60	Osteopetrosis	211	65	146
61	Parathyroid carcinoma,PTC	200	93	107
62	Pseudo-hypoparathyroidism	197	92	105
63	Mitochondrial encephalomyopathy with lactic acidosis and stroke-like episodes (MELAS)	194	105	89
64	Gilbert’s syndrome	192	103	89
65	Kimura disease, KD	179	97	82
66	Inherited abnomalities of fibrinogen	177	125	52
67	Spinocerebellar ataxia*	168	44	124
68	Kallmann syndrome*	152	78	74
69	Hyper IgE syndrome，HIES	146	64	82
70	Lennox-Gastaut syndrome	141	66	75
71	Klinefelter syndrome	141	47	94
72	Frontotemporal dementia	140	49	91
73	Multifocal motor neuropathy, MMN*	139	61	78
74	McCune-Albright syndrome*	136	63	73
75	Autoimmune necrotic myopathy	129	48	81
76	Aniridia	127	66	61
77	Hyperphenylalaninemia*	126	79	47
78	Myotonic dystrophy*	125	61	64
79	Gaucher’s disease*	123	69	54
80	Primary ciliary dyskinesia (PCD)	123	30	93
81	Huntington disease*	117	52	65
82	Hypoplastic left heart syndrome, HLHS	116	65	51
83	Achondroplasia	112	43	69
84	X-linked agammaglobulinemia*	109	34	75
85	Progressive multifocal leukoencephalopathy	108	10	98
86	Incontinentia Pigmenti	108	50	58
87	Sideroblastic anemia, SA	105	52	53
88	Severe myoclonic epilepsy in infancy*	104	31	73
89	Chronic primary granulomatous disease	103	52	51
90	Prader-Willi syndrome*	102	50	52
91	Spinal and bulbar muscular atrophy*	101	42	59
92	Prion disease	99	32	67
93	Goldenhar syndrome	99	36	63
94	Adrenoleukodystrophy，ALD*	93	47	46
95	Porphyria*	92	50	42
96	Erythromelalgia	89	47	42
97	Cystic fibrosis，CF*	87	39	48
98	Ectodermal dysplasia	87	38	49
99	Primary carnitine deficiency*	86	31	55
100	Niemann-Pick disease*	86	41	45
101	Congenital amegakarypcytic thrombocytopenia, CAMT	82	37	45
102	Rett syndrome	80	45	35
103	Dopa-responsive dystonia, DRD	78	30	48
104	Thyroid hormone resistance syndrome，RTH	71	33	38
105	Fabry disease*	69	34	35
106	Multiple epiphyseal dysplasia	66	28	38
107	Von Hippel-Lindau disease	66	41	25
108	Peutz-Jeghers syndrome*	62	51	11
109	Hereditary pigmented dermatosis	60	26	34
110	Propionic academia*	58	29	29
111	Cerebral autosomal dominant arteriopathy with subcortical infarcts and leukoencephalopathy, CADASIL	57	34	23
112	Citrullinemia*	55	29	26
113	Xeroderma pigmentosum，XP	54	27	27
114	Inclusion body myositis	52	17	35
115	Treacher Collins Syndrome，TCS	52	19	33
116	Juvenile myoclonic epilepsy	51	14	37
117	Lymphangioleiomyomatosis (LAM)*	47	28	19
118	Facioscapulohumeral muscular dystrophy	46	19	27
119	Pulmory veno-occlusive disease (PVOD)	45	15	30
120	Angelman syndrome*	42	12	30
121	Idiopathic pulmonary hemosiderosis, IPH	42	3	39
122	Polypoidal choroidal vasculopathy	41	18	23
123	Heritable pulmonary arterial hypertension	40	17	23
124	Congenital hyperinsulinemic hypoglycemia*	40	2	38
125	Maple syrup urine disease*	40	16	24
126	Fraser syndrome	39	15	24
127	Familial hemophagocytic lymphohistiocytosis	38	25	13
128	Pachydermoperiostosis	37	17	20
129	Congenital dyserythropoietic anemia, CDA	36	12	24
130	Hereditary motor neuropathy	36	21	15
131	Follicular occlusion triad	35	15	20
132	Palmoplantar keratoderma	34	16	18
133	Bardet-Biedle syndrome，BBS	34	15	19
134	Familial Mediterranean fever*	32	15	17
135	(Severe) combined immune deficiency*	31	7	24
136	Hallervorden-Spatz syndrome	30	10	20
137	DiGeorge Syndrome, DGS	27	13	14
138	Primary pigmented nodular adrenocortical disease	27	12	15
139	Hereditary dystonia*	27	14	13
140	Dyskeratosis congenita	27	10	17
141	Von Willebrand disease,vWD	26	14	12
142	Progeria	23	15	8
143	Cri-du-chat syndrome	23	12	11
144	Pulmonary capillary hemangiomatosis (PCH)	21	10	11
145	Metachromatic leukodystrophy	21	6	15
146	Neuronal ceroid lipofuscinosis	21	10	11
147	Lowe syndrome	21	12	9
148	Distal myopathy	20	11	9
149	Congenital Muscular dystrophy	20	11	9
150	Williams syndrome*	20	0	20
151	Leber hereditary optic neuropathy*	19	5	14
152	Familial amyloid polyneuropathy	19	7	12
153	Erdheim-Chester disease*	18	9	9
154	Myositis ossificans progressive	18	10	8
155	Oculopharygeal Muscular dystrophy	17	9	8
156	Congenital myotonia syndrome*	17	10	7
157	Idiopathic cardiomyopathy*	15	10	5
158	Hereditary angioedema (HAE)*	15	6	9
159	Benign familial neonatal-infantile seizures	15	1	14
160	Noonan syndrome*	15	5	10
161	Kearns-Sayre syndrome	14	7	7
162	Tyrosinemia*	14	8	6
163	Arginase deficiency*	14	1	13
164	Friedreich ataxia，FRDA	14	10	4
165	Glanzmann thrombasthenia, GT	13	6	7
166	a-1-Antitrypsin Deficiency, AATD	13	3	10
167	Hereditary sensory neuropathy	13	9	4
168	Silver-Russell syndrome*	13	6	7
169	X-linked lymphoproliferative disease*	12	7	5
170	Menkes disease，MD	12	4	8
171	Fragile X syndrome	11	8	3
172	Chronic progressive ophthalmoplegia	10	0	10
173	Galactosemia*	10	5	5
174	Congenital myasthenic syndrome，CMS*	10	2	8
175	Cockayne syndrome	9	5	4
176	Congenital neutropenia*	8	1	7
177	Ataxia telangiectasia	8	4	4
178	Autosomal recessive polycystic kidney disease (ARPKD)	8	1	7
179	Biotinidase deficiency*	7	3	4
180	Congenital adrenal hypoplasia*	7	5	2
181	Laron syndrome*	7	5	2
182	Hypophosphatasia，HPP*	7	3	4
183	Hereditary inclusion body myopathy	7	1	6
184	Nail-patella syndrome	7	1	6
185	Hyperkalemic Periodic paralysis	6	3	3
186	Autosomal dominant Nocturnal Frontal Lobe Epilepsy	6	1	5
187	Kabuki syndrome	6	3	3
188	Wiskott-Aldrich syndrome*	5	3	2
189	Nemaline myopathy	5	0	5
190	Primary intestinal lymphangiectasia，PIL	4	2	2
191	Progressive familial intrahepatic cholestasis*	4	0	4
192	Krabbe disease	3	1	2
193	Giant axonal neuropathy	3	1	2
194	Emery－dreifuss Muscular dystrophy	3	0	3
195	Joubert syndrome	3	0	3
196	Blau syndrome，BS	3	1	2
197	Congenital retinoschisis	2	1	1
198	Multiple acyl-CoA dehydrogenase deficiency*	2	0	2
199	Early-onset familial hemiplegic migraine	2	1	1
200	Pachyonychia congenita	2	2	0
201	Proteus syndrome	2	0	2
202	Recessive X-linked ichthyosis	2	0	2
203	Cornelia de Lange Syndrome	2	2	0
204	Pancreatic cyctic tumor	2	0	2
205	Isovaleric acidemia*	1	0	1
206	Ornithine transcarbamylase deficiency*	1	0	1
207	Glutaric acidemia type Ⅰ*	1	0	1
208	Hereditary fructose intolerance*	1	1	0
209	Leukoencephalopathy, cerebral calcifications，and cysts	1	0	1
210	Sandhoff disease	1	0	1
211	Alexander disease	1	0	1
212	Pelizaeus-Merzbacher disease	1	0	1
213	Hereditary hypomagnesemia*	1	0	1
214	Myoclonic epilepsy with ragged-red fibers（MERRF）	1	0	1
215	Hereditary autonomic neuropathy	1	0	1
216	Idiopathic glomerular nodular sclerosis	1	1	0
217	Hereditary epidermolysis bullosa*	1	0	1
218	Rubinstein-Taybi syndrome	1	1	0
219	Digestive duct and neuroendocrine tumor	1	0	1
220	Retinal vasculopathy with cerebral leukodystrophy，RVCL	0	0	0
221	Autosomal-dominant familial Meniere disease	0	0	0
222	Cerebral autosomal recessive arteriopathy with subcortical infarcts and leukoencephalopathy,CARASIL	0	0	0
223	Shwachman-Diamond syndrome	0	0	0
224	GATA1-related cytopenia, GRC	0	0	0
225	Holocarboxylase synthetase deficiency*	0	0	0
226	Tetrahydrobiopterin deficiency*	0	0	0
227	Piebaldism	0	0	0
228	Chediak-Higashi syndrome	0	0	0
229	Long chain 3-hydroxyacyl-CoA dehydrogenase deficiency*	0	0	0
230	Medium chain acyl-CoA dehydrogenase deficiency*	0	0	0
231	Very long chain acyl-CoA dehydrogenase deficiency*	0	0	0
232	NAGS deficiency*	0	0	0
233	GM1 gangliosidoses	0	0	0
234	Canavan leukodystrophy.	0	0	0
235	Megalencephalic leukoencephalopathy with subcortical cysts	0	0	0
236	Familial hyperchylomicronemia	0	0	0
237	Mitochondrial neurogastrointestinal encephalomyopathy (MNGIE)*	0	0	0
238	Hereditary cerebral amyloid angiopathy	0	0	0
239	Primary light chain amyloidosis*	0	0	0
240	Hereditary hypophosphatemic rickets*	0	0	0
241	ACTH-independent Macronodular adrenal hyperplasia	0	0	0
242	Fructose-1,6-bisphosphatase deficiency	0	0	0
243	Pyruvatede hydrogenase E1-a deficiency	0	0	0
244	Autosomal dominant Epilepsy with auditory feature	0	0	0
245	Pyridoxine-dependent epilepsy，PDE	0	0	0
246	Limb girdle Muscular dystrophy type 1	0	0	0
247	Limb girdle Muscular dystrophy type 2	0	0	0
248	Centronuclear myopathy	0	0	0
249	Central Core disease	0	0	0
250	X-linked myotubular myopathy	0	0	0
251	Schwartz Jampel syndrome	0	0	0
252	Congenital fiber type disproportion	0	0	0
253	Autosomal recessive steroid-resistant nephrotic syndrome	0	0	0
254	Autosomal dominant steroid-resistant nephrotic syndrome	0	0	0
255	Congenital nephrogenic diabetes insipidus, cNDI	0	0	0
256	Hereditary cystic kidney disease	0	0	0
257	Permanent neonatal diabetes mellitus*	0	0	0
258	Nager acrofacial dysostosis	0	0	0
259	Congenital central hypoventilation syndrome, CCHS	0	0	0
260	Hereditary bronchiectasis	0	0	0
261	X-linked hyper IgM syndrome	0	0	0
262	Pyruvate kinase deficiency, PKD	0	0	0
263	Leukoencephalopathy with vanishing white matter	0	0	0
264	Hereditary Diffuse Leukoencephalopathy with Spheroids，HDLS	0	0	0
265	Beta-ketothiolase deficiency*	0	0	0
266	Lysosomal acid lipase deficiency*	0	0	0
267	Sitosterolemia*	0	0	0
268	Neuroaxonal dystrophy	0	0	0
269	Familial Paroxysmal Kinesigenic Dyskinesia	0	0	0
270	The collagen Ⅵ-related myopathies	0	0	0
271	Myofibrillar myopathy	0	0	0
272	Desminopathy	0	0	0
273	Inborn errors of bile acid synthesis*	0	0	0
274	Autoimmune enteritis	0	0	0
275	Schimke immuno-osseous dysplasia，SIOD	0	0	0
276	Jeune syndrome*	0	0	0
277	Pseudoachondroplasia	0	0	0
278	Non-syndromic deafness*	0	0	0
279	Familial cortical myoclonic tremor with epilepsy.	0	0	0
280	Creatine deficiency syndrome, CDS	0	0	0
281	Very early onset inflammatory bowel disease,VEO-IBD	0	0	0
	*stand for the rare disease is also in the"First Rare Diseases Catalogue"
